# Supplementary material for: Elevated albumin-bilirubin score as a predictor of kidney stones in adults with type 2 diabetes mellitus: evidence from a cross-sectional study
Source: PeerJ. 2025 May 14;13:e19419. doi: 10.7717/peerj.19419 (PMC12085120; doi:10.7717/peerj.19419)
Supplement: Supplemental Information 1 [file peerj-13-19419-s001.xls]

## Sheet: Raw data
Patiens No.	sex	height (cm)	weight （kg）	BMI	age	Marital status	Systolic pressure (mmHg)	Diastolic pressure (mmHg)	hypertension	HbA1c, %	RBC, ×10*12/L	Hb, g/L	WBC, ×10*9/L	PLT×10*9/L	AST, IU/L	ALT, IU/L	ALP, IU/L	ALBIscore	Scr, µmol/L	UA, μmol/L	BUN, mmol/L	eGRF, mL/min/1.73m²	TG, mmol/L	LDL, mmol/L	HDL, mmol/L	Renal stones
1	1	155	48	19.9792	54	1	126	80	0	12.9	4.55	137	5.79	233	30	28	92	-3.0592	35	277	8.5	117.83	0.63	2.67	1.39	0
2	2	165	59	21.6713	69	1	133	82	0	6.4	4.54	142	4.66	232	15	19	54	-2.79171	73	251	8.3	94.8867	1.26	2.32	1.02	0
3	1	168	66.5	23.5615	45	1	126	84	0	9.2	3.76	83	4.54	255	13.7	11.6	56	-2.6852	28	180.9	4.95	131.499	1.73	3.07	1.03	0
4	2	158	60	24.0346	68	1	144	71	1	9.1	3.84	113	6.09	167	27	21	115	-2.7432	41	162	4.6	113.65	1.42	0.81	0.73	0
5	2	177	103	32.8769	54	1	133	84	0	7.3	4.8	148	3.88	184	33	26	56	-2.86647	65	329	4.8	107.881	2.23	1.18	0.56	0
6	2	173	65	21.7181	52	1	117	77	0	8.5	4.46	140	5.09	124	69.6	33.1	108	-2.74153	76	274.5	6.1	104.193	0.95	2.39	1.11	0
7	1	155	65	27.0552	64	1	168	88	1	7.9	4.21	126	7.33	233	45	25	112	-2.99313	41	262	4.41	106.583	1.56	4.26	1.1	0
8	1	170	70	24.2215	63	1	171	94	1	8	4.53	138	5.43	149	21	22	96	-2.76499	68	232	6.9	86.7271	0.82	1.98	1.43	0
9	2	185	87	25.42	48	1	128	77	0	6.5	5.67	179	5.65	138	29.2	22.1	93	-2.68088	63	318.7	5.29	113.044	2.6	3.15	0.97	1
10	2	166	64	23.2254	74	2	152	83	1	6.3	5.67	123	5.72	166	18.1	15	49	-2.64842	68	269.3	9.85	93.9736	0.81	1.81	1.03	0
11	2	170	78	26.9896	64	1	139	82	0	7.3	4.43	140	5.5	83	19	16	93	-2.57111	73	305	7.36	97.8837	1.17	2.21	0.65	0
12	1	150	58	25.7778	55	1	150	91	1	10.3	4.2	129	6.2	321	35.8	17.1	111	-2.7749	44	285.9	4.74	110.817	1.39	4.06	1.31	0
13	2	180	85	26.2346	54	1	155	99	1	9.3	4.77	137	4.93	152	81	38	59	-2.75451	77	335	3.58	102.5	1.6	2.8	0.63	1
14	2	174	93.5	30.8825	33	0	189	122	1	12.2	4.49	136	7.38	249	18	20	54	-2.70647	88	579	10.53	102.473	28.33	0.92	0.54	0
15	2	176	89	28.7319	57	1	141	90	1	7.7	5.11	171	7.42	104	79	46	80	-2.80981	59	362	5.26	109.029	4.29	2.02	0.64	0
16	2	173	59	19.7133	56	1	152	93	1	10	2.75	84	4.73	211	5	10	79	-1.59038	66	165	5.37	106.057	0.79	2.15	1.74	1
17	2	158	68.5	27.4395	61	2	124	101	1	9.4	4.61	143	5.68	147	12	17.5	64	-2.67924	56	333	4.44	108.04	3.53	2.06	0.86	0
18	2	170	64	22.1453	58	1	114	79	0	11.8	4.24	126	4.95	177	14	14	96	-2.5878	68	259	7.9	103.806	1.65	1.64	0.77	1
19	2	176	80	25.8264	46	1	111	77	0	12.6	5.48	161	8.14	283	20	14	69	-2.09518	84	450	4.63	99.9403	7.36	2.75	0.74	0
20	2	174	66	21.7994	65	1	127	79	0	7.8	3.98	126	4.13	102	27.4	23.6	71	-2.44158	111	370.5	10.83	63.5578	0.64	1.16	1.11	0
21	2	173	88	29.4029	58	1	170	92	1	8	4.73	141	3.5	157	14	18	70	-2.71824	60	304	4.94	107.805	0.88	2.94	1.29	1
22	2	187	80	22.8774	44	1	120	98	1	6.7	4.05	137	5.16	98	28.9	38.3	65	-3.17566	58	346.8	7.92	118.822	24.66	1.2	0.9	0
23	2	173	77	25.7276	28	1	118	86	0	9.8	5.59	157	7.97	197	35.5	18.1	60	-2.94148	66	355.7	5.56	126.231	2.72	3.18	0.99	0
24	2	167	68	24.3824	69	1	130	78	0	6.5	3.67	121	9.45	163	21	27	56	-2.47778	79	360	5.9	92.65	1.63	1.44	0.66	0
25	1	160	63	24.6094	78	1	133	84	0	10.1	4.29	119	4.84	239	9	20	90	-2.86496	109	260	6.6	44.8476	2.15	3	0.86	0
26	1	152	52	22.5069	64	1	117	70	0	11.3	3.84	111	4.08	136	21	19	88	-3.41644	116	436	14.64	45.4062	1.96	1.41	1.01	0
27	1	167	64	22.9481	64	1	116	84	0	5.7	3.93	131	3.62	165	31.1	29.8	89	-2.8999	54	349.8	6.87	99.7381	1.23	3.25	1.4	0
28	1	155	50	20.8117	84	1	138	68	0	9.8	4.53	126	6.43	132	20	23	66	-2.80804	92	244	8	52.9541	1.52	3.07	1.3	0
29	2	178	81	25.565	60	1	132	90	1	8.1	4.53	140	7.25	251	15.1	19.5	80	-2.83502	64	411.3	7.1	104.417	11.97	2.24	0.83	0
30	2	160	78	30.4687	79	1	158	81	1	7.7	3.7	111	4.57	167	33	31.1	88	-2.26092	67	365.7	8.78	91.5048	1.67	2.27	0.76	0
31	2	175	65	21.2245	63	1	109	69	0	9.9	4.78	141	6.66	204	23	14	112	-2.38786	75	196	6.32	97.6936	1.06	2.31	0.97	1
32	2	172	70	23.6614	49	1	125	83	0	8.9	5.02	148	6.8	222	20	12	81	-3.20092	70	267	6.1	108.825	3.26	3.43	0.88	0
33	2	178	102	32.1929	37	1	130	78	0	12	4.69	136	6.4	204	88.9	59.1	86	-2.32906	55	391.8	3.22	126.116	5.36	2.87	0.69	0
34	2	172	74	25.0135	73	1	143	73	1	7.6	4.31	128	7.08	230	18	19	64	-2.64156	122	429	7.3	53.9904	1.59	2.39	0.62	0
35	2	163	60	22.5827	49	1	117	86	0	6.8	3.88	112	8.54	207	14	25	79	-2.95022	82	323	7.55	100.971	1.76	1.62	1.17	0
36	2	173	81	27.0641	77	1	198	98	1	9.6	3.59	117	8.97	220	33.7	29.2	89	-2.6172	94	393.9	7.51	72.0097	2.08	1.81	0.7	0
37	2	173	61	20.3816	70	1	158	96	1	10.4	4.52	146	5.76	129	21	16	149	-2.53882	74	345	8.23	93.9117	2.09	2.87	0.74	0
38	2	177	80	25.5354	61	1	124	72	0	7.8	4.6	139	5.88	131	36	20	89	-3.18444	62	272	8.18	104.769	2.06	1.07	0.74	0
39	1	160	68	26.5625	45	1	128	88	0	9.8	4.31	102	6.12	181	12.7	16.8	74	-2.58788	49	260	5.19	114.908	0.81	1.52	1.15	0
40	1	155	64	26.6389	86	1	148	76	1	7.8	4.07	125	6.57	161	19	17	74	-2.95292	68	365	8	75.1678	1.62	1.8	1.14	0
41	1	160	68	26.5625	64	1	146	73	1	6.6	3.8	119	5.29	193	23	12	67	-2.4957	79	232	5.79	71.9966	0.94	1.65	0.99	0
42	1	160	41.5	16.2109	44	1	99	77	0	10.5	3.64	86	13.5	478	17.6	54.5	150.3	-2.36984	33	164.6	7.21	127.182	1.83	4.16	0.61	0
43	1	150	60	26.6667	80	2	159	87	1	7.5	4.46	140	6.26	184	33.2	27	90	-2.54361	54	425.1	3.89	90.2911	2.26	2.91	1.19	0
44	2	175	69	22.5306	61	1	124	68	0	8.5	4.6	139	6.48	217	18	19	119	-3.069	71	265	7.14	100.567	1.2	2.03	1.05	0
45	1	155	80	33.2986	57	1	159	84	1	8.3	4.25	121	9.7	249	29	38	109	-2.6544	60	426	7.24	101.564	2.72	3.54	1.27	0
46	2	168	51	18.0697	64	1	131	88	0	6.5	4.53	135	4.36	148	37	31	63	-3.34171	63	366	6.87	102.337	1.01	2.12	0.96	0
47	2	167	62	22.231	65	1	113	62	0	7.5	3.99	120	4.71	128	15.3	17.4	103	-2.54036	86	229	6.72	86.3293	2.21	2.75	0.93	0
48	2	170	70	24.2215	79	1	152	98	1	6.2	5.06	144	9.24	394	13	20	82	-2.434	85	306	4.8	80.249	2.54	4.8	1.11	0
49	1	158	49	19.6283	59	1	135	75	0	6.6	3.86	84	9.45	273	15	18	50	-2.0528	52	194	6.7	103.828	1.04	3.81	2.12	0
50	2	168	69.5	24.6244	54	1	124	82	0	7.7	4.11	123	4.64	125	28	23	93	-2.44243	135	301	9.92	53.8105	2.8	1.47	0.93	0
51	2	168	61	21.6128	73	1	165	83	1	6	4.53	139	5.24	150	73.8	48.3	91	-2.2857	59	176	5.56	98.7023	1.05	3.16	1.23	1
52	1	150	51	22.6667	65	1	156	84	1	10.9	4.15	115	7.74	171	9.1	10.8	89	-2.64236	52	204.5	4.98	100.025	1.49	1.82	1.01	0
53	2	182	84	25.3593	70	1	117	74	0	6	3.82	125	4.79	190	12	18	56	-3.30316	76	345	4	93.1584	0.86	1.69	0.73	0
54	2	172	89	30.0838	45	1	160	109	1	9.7	4.71	146	5.25	200	20	12	86	-3.25923	95	410	9.2	86.7578	2.74	3.13	1.18	0
55	1	151	55	24.1217	70	1	133	87	0	9.9	3.91	120	5.6	173	18	18	64	-3.42348	73	301	7.1	76.2555	3.48	4.34	1.17	0
56	2	178	75	23.6713	50	1	108	80	0	10.8	5.29	152	8.08	259	15	14	69	-2.24296	69	390	11.3	108.621	1.64	3.29	0.64	0
57	2	170	70	24.2215	72	1	138	74	0	11	4.59	143	8.6	196	33	19	109	-3.10167	81	274	11.21	88.8112	0.93	1.16	0.83	0
58	2	180	70	21.6049	68	1	105	84	0	13.2	3.81	117	6.9	316	12	10	120	-2.53329	44	220	4.88	111.252	1.37	5	0.81	1
59	2	171	74	25.3069	75	1	150	85	1	8.2	5.2	152	6.65	167	124.1	37.5	80	-2.09642	102	343.9	7.37	66.1038	1.84	2.65	0.72	1
60	1	158	62	24.8358	76	2	118	59	0	8.7	4.02	121	3.89	197	78	158	88	-3.03496	102	342	10	49.1736	1.24	1.32	1.27	0
61	1	159	50	19.7777	39	1	152	96	1	9.9	3.75	112	11.17	286	96.1	52.2	170	-2.20303	38	217.7	4.44	126.813	5.98	5.65	1.47	0
62	2	170	76	26.2976	42	1	115	99	1	10.1	4.87	137	9.16	175	34	18	88	-2.91579	59	302	3.4	119.69	3.48	3.71	0.74	0
63	1	168	69	24.4473	42	1	122	80	0	7.5	4.21	92	7.05	427	20	16	70	-2.77702	42	210	4.51	121.503	1.54	3.17	0.88	0
64	1	162	65	24.7676	74	1	132	88	0	7.6	4.05	126	4.06	191	24	23	96	-3.69416	50	242	6.5	95.4786	1.39	2.98	1.54	0
65	2	174	94	31.0477	49	1	180	91	1	6	4.62	136	6.1	277	15.5	12.3	75	-2.5946	52	213.8	5.98	119.046	1.54	2.31	0.78	0
66	1	159	57	22.5466	53	1	107	80	0	6.8	3.81	118	4.91	239	12	7	42	-2.14218	47	226	5.8	110.434	1.7	3.73	2.1	0
67	1	171	64	21.8871	30	1	129	72	0	8.2	4.04	115	5.58	246	12	16	50	-2.57857	49	318	4.35	126.144	0.76	2.08	1.57	0
68	1	168	62	21.9671	63	1	110	67	0	6.1	3.89	116	3.98	112	12	19	84	-2.69304	62	251	7.7	96.8937	0.5	1.3	1.55	0
69	1	151	47	20.6131	54	1	133	80	0	12.3	4.57	137	5.1	168	14.3	16	111	-2.66357	46	216.5	6.27	110.32	2.46	4.82	1.41	0
70	2	172	85	28.7317	61	1	139	87	0	9.6	5.49	162	6.48	179	19	21	63	-2.91128	83	421	5.98	92.3564	1.19	3.14	0.67	0
71	1	158	62	24.8358	39	1	119	80	0	10.1	5.01	145	7.68	398	16	29	82	-2.97046	41	648	6.14	124.512	2.98	3.31	0.5	0
72	2	174	79	26.0933	54	1	132	86	0	7.1	4.71	129	5.17	129	15	16	74	-2.81286	48	365	6.01	118.225	1.44	2.06	0.93	0
73	2	174	65	21.4692	53	1	143	83	1	6.5	5.06	154	7.7	94	14.7	18.8	80.4	-2.76238	60.7	244.1	14.82	110.821	1.4	1.56	0.55	0
74	1	168	68	24.093	74	1	141	83	1	8.7	4.14	121	5.65	166	21.8	20.1	113	-2.71176	95	453.1	8.41	54.2233	2.48	2.83	1.01	1
75	2	167	64	22.9481	59	1	147	97	1	7.6	4.03	128	7.34	189	32.8	26.6	85	-2.57446	85	356.3	5.8	90.8782	2.64	3.68	1.15	0
76	1	157	48	19.4734	87	1	144	73	1	11.4	3.34	74	8.26	290	14	25.7	81	-2.24744	51	172	3.98	87.6436	1.39	1.62	0.78	0
77	2	180	95	29.321	35	1	116	73	0	7.4	5.26	151	10.43	185	17	18	92	-3.18948	63	311	5.5	122.564	2.54	4.28	1.06	0
78	1	150	62	27.5556	77	1	136	82	0	5.8	3.15	105	3.43	129	15.6	33	49	-2.6695	109	390.1	6.52	45.1274	2.23	3.32	1.12	0
79	1	155	70	29.1363	63	1	149	81	1	10.7	3.49	103	5.89	256	12	12	86	-2.44601	53	264	7.9	100.813	2.05	3.21	1.16	1
80	2	178	105	33.1398	49	1	145	96	1	8	4.56	137	7.61	170	41.8	28.5	79	-2.9332	87	475.1	5.48	94.048	4.08	3.48	0.94	0
81	1	165	60	22.0386	62	1	125	79	0	9.8	3.92	123	6.42	283	20	17	87	-2.81192	51	289	6.02	102.387	3.98	2.45	0.74	0
82	2	171	65	22.2291	32	1	124	77	0	9.7	4.51	138	5.78	143	16.9	11.4	80	-2.34459	121	499.3	7.43	70.3635	6.52	2.56	0.9	0
83	2	178	74	23.3556	67	1	94	64	0	4.9	4.89	142	3.78	146	14.1	15.3	46	-2.22604	39	275.8	7.26	116.099	1.01	1.71	0.91	0
84	1	150	90	40	38	1	147	75	1	7.1	4.58	121	11.92	269	41.5	40	109	-2.5732	38	326.7	4.09	127.605	2.56	3.25	0.99	0
85	2	175	75	24.4898	43	1	125	82	0	10.4	5.31	164	6.43	161	16	13	95	-3.0847	86	417	6.78	98.9876	7.39	2.57	0.7	0
86	2	179	112.5	35.1113	32	1	133	89	0	10.8	4.57	135	4.76	129	22	18	91	-2.97992	48	414	6.77	135.56	11.76	1.9	0.73	0
87	1	163	68	25.5937	78	1	149	70	1	7.4	4.16	125	7.3	191	15	22	104	-3.13594	44	356	6.5	96.0466	1.64	1.99	0.94	0
88	1	153	50	21.3593	57	1	99	68	0	7.1	3.91	115	4.39	266	25	27	68	-2.66481	55	266	5.8	103.716	2.15	1.36	0.6	0
89	2	170	86	29.7578	58	1	143	89	1	7.4	5.09	155	8.32	236	30	19	84	-2.82374	84	471	6.59	92.7531	1.74	1.98	0.81	0
90	2	162	70	26.6728	56	1	130	89	0	8.7	4.68	152	9.67	207	34.3	24.2	81	-2.60226	76	378.4	5.77	101.633	1.6	2.24	0.98	0
91	2	173	69	23.0546	72	1	148	62	1	7.8	4	127	7.65	382	29	27	81	-2.1412	49	151	3.02	105.048	1.08	1.6	0.71	0
92	2	178	67	21.1463	58	1	115	80	0	7.5	3.46	113	10.59	194	101	112	214	-2.2971	83	247	5.8	94.0957	1.38	1.69	1.07	0
93	1	157	56	22.719	68	1	158	94	1	11.2	4.15	127	4.06	190	14.6	19.2	73.7	-3.31081	46	162.4	6.08	101.121	2.19	3.66	0.93	0
94	2	180	95	29.321	46	1	141	106	1	12.5	5.54	163	7.84	270	39.5	22.9	103.9	-3.15535	96.5	419.2	5.32	84.6141	1.31	2.48	0.72	0
95	2	172	63	21.2953	74	1	117	65	0	8.9	4.91	149	8.41	380	18.3	17	68	-2.81674	72.5	371	7.6	92.1725	0.86	3.28	1.23	0
96	2	178	76	23.9869	57	1	133	85	0	8.5	4.77	150	6.07	158	11	17	63	-2.79008	60	271	5.4	108.477	1.84	2.62	0.63	0
97	1	158	62	24.8358	48	1	120	80	0	8.4	3.76	115	7.45	242	10.8	20.3	79	-2.74176	62	413.6	8.31	106.368	1.56	3.83	1.11	0
98	2	178	82	25.8806	68	1	124	71	0	7.3	3.51	115	5.32	151	14	10	53	-2.57408	69	341	6.84	97.1174	1.13	0.83	0.84	0
99	1	155	63	26.2227	58	1	113	64	0	6	3.33	103	5.13	140	10	16	57	-3.22792	55	388	4.8	103.073	1.77	2.65	0.96	0
100	1	160	74	28.9062	57	1	127	87	0	6.7	3.95	124	6.03	302	31.7	25.8	100	-2.75132	42	229.6	3.44	110.681	1.8	1.55	1.04	0
101	1	167	68	24.3824	68	1	122	88	0	7.5	3.84	106	7.97	324	40.2	20.5	187	-2.1944	36	242.9	4.5	107.274	0.74	1.49	0.84	0
102	1	168	75	26.5731	58	1	140	88	1	6.4	4.62	135	5.02	191	53	40	71	-3.34698	50	390	5.8	105.468	1.54	2.06	1.19	0
103	1	160	60	23.4375	59	1	159	97	1	7.5	4.33	132	6.28	140	7.6	13.3	89	-2.45358	51	229.6	3.36	104.315	1.79	1.61	0.88	0
104	2	175	62	20.2449	59	1	116	79	0	10.3	4.5	149	4.62	292	11	14	57	-2.89304	65	286	7.3	104.578	0.83	3.73	1.32	0
105	1	153	59	25.204	70	1	109	71	0	9.1	4.44	127	6.45	228	23	23.3	106	-2.44402	65	268.2	6.44	87.6522	1.84	4.38	1.38	0
106	2	170	75	25.9516	49	1	143	103	1	6.5	5.94	124	7.23	237	10	11	48	-2.28676	67	257	6	110.274	1.36	3.27	0.8	0
107	2	170	70	24.2215	46	1	146	92	1	6.9	4.33	139	7.27	252	20.6	12.6	110	-2.79292	55	229.2	6.89	119.251	2.55	1.65	0.7	0
108	2	165	68	24.977	73	1	146	93	1	8.6	3.88	118	7.82	210	13	13	100	-2.29194	78	229	8.27	90.7219	0.7	1.63	0.76	0
109	1	168	51.5	18.2469	60	1	129	72	0	7.5	4.14	117	5.11	138	11	19.6	135	-2.39302	50	178	4.42	104.165	1.3	2.36	1.06	0
110	1	163	62.5	23.5237	49	1	106	81	0	6.5	4.24	134	5.31	210	63.2	44.8	100	-2.56617	49	226.9	6.82	112.085	1.09	3.04	1.29	0
111	2	175	61	19.9184	76	1	137	85	0	5.9	4.26	138	20.66	118	18	22	71	-2.8839	60	251	6.94	96.3873	0.6	3.06	1.1	0
112	2	179	86	26.8406	43	1	148	99	1	5.9	4.67	145	7.52	115	10.4	16.2	57	-3.029	67	439.9	5.1	114.467	3.88	1.59	0.79	0
113	2	174	99	32.6992	56	1	155	95	1	7.5	4.9	139	5.37	138	41	27	55	-2.81938	59	330	4.63	109.71	2.51	2.3	1.05	0
114	2	180	93	28.7037	46	1	131	88	0	8	5.08	153	13.74	305	32	28	93	-3.31749	62	508	5.09	115.014	2.5	3.12	0.84	1
115	2	165	65	23.8751	45	1	107	75	0	13.6	5.35	156	4.77	159	25.9	20	238	-2.86699	46	220.5	5.23	126.648	1.95	3.06	1.28	0
116	2	170	75	25.9516	57	1	130	83	0	12.2	4.48	139	4.8	124	15.9	14.3	69	-2.1015	71	352.8	7.02	103.1	2.91	2.74	0.83	1
117	2	175	72	23.5102	35	1	120	86	0	7.1	5.37	170	7.99	148	36	16	104	-2.80698	76	423	6.9	115.813	4.58	2.65	1.01	1
118	2	165	59	21.6713	62	1	123	68	0	9.1	4.16	131	5.02	215	11	12	64	-2.47144	75	279	6.89	98.3031	0.8	2.16	1.29	0
119	2	170	72	24.9135	50	1	158	96	1	9.6	4.29	136	8.21	274	35	18	95	-3.07746	62	424	5.49	112.188	3	2.71	0.69	0
120	2	158	78	31.245	45	1	153	102	1	8.6	5.04	161	5.81	177	36	16	85	-3.25288	73	349	6	110.161	8.7	2.83	0.76	0
121	1	162	66	25.1486	63	1	114	76	0	5.9	3.96	124	5.4	117	18	18.1	64	-2.46272	60	224.9	6.89	97.8441	0.6	2.19	1.77	0
122	1	160	57	22.2656	53	1	153	92	1	5.8	4.23	126	5.02	187	43.5	40.1	73	-2.69088	57	263.4	4.82	105.418	2	3.15	1.33	0
123	2	159	94	37.1821	32	1	153	99	1	12	4.45	138	7.11	344	97	83	119	-3.0147	86	534	7.73	105.997	5.98	3.43	0.71	1
124	2	155	79	32.8824	57	1	122	70	0	8.2	3.62	120	8.65	161	14	14	82	-2.77084	87	394	8.18	89.4832	7.79	1.45	0.54	0
125	1	175	65	21.2245	47	1	156	110	1	8.1	4.83	154	9.52	256	25	23	69	-2.72826	60	413	5.35	108.081	2.71	3.29	0.72	0
126	1	150	69	30.6667	77	1	120	62	0	6.7	3.1	97	6.99	176	222	185	137	-2.6877	104	433	10.34	47.7432	1.17	3.41	1.13	0
127	2	155	88	36.6285	20	0	137	87	0	13	5.29	160	8.37	254	11	14	58	-2.97764	63	276	4.65	134.548	0.93	2.36	0.88	0
128	2	160	74	28.9062	67	1	118	64	0	6.9	4.72	139	6.37	211	41	34	62	-2.57326	45	277	5.39	111.189	0.78	0.86	1.17	0
129	1	176	70	22.5981	74	1	143	71	1	5.9	4.35	127	5.43	147	24	17	66	-2.81653	49	314	4.86	95.9446	1.34	1.59	0.91	0
130	2	155	85	35.3798	39	1	143	78	1	8.7	4.75	138	5.17	181	22.7	18.2	69	-2.78861	55	293.6	8.14	124.557	3.16	2.72	0.95	0
131	2	168	67	23.7387	73	1	132	75	0	8.5	5.92	148	7.94	124	32	31	73	-2.24124	120	423	14.1	55.072	0.97	2.17	1.05	0
132	1	170	69	23.8754	56	1	138	74	0	9.7	4.33	128	6.07	221	18.3	18.5	82	-2.75442	52	131.8	6.7	105.784	0.97	4.8	1.44	0
133	2	160	58	22.6562	61	1	133	89	0	8.4	4.43	145	5.79	193	14	20	83	-2.30463	72	361	7.54	100.143	0.88	2.42	1.5	0
134	2	165	71	26.079	52	1	124	87	0	9.4	4.73	140	6.19	185	22	18	81	-3.04329	59	383	7.32	112.473	1.21	2.68	1.1	0
135	2	160	72.5	28.3203	79	1	132	72	0	8.1	4.01	122	7.22	182	17	13	94	-2.64204	87	351	6.59	78.0404	1.38	1.41	0.49	0
136	2	155	71	29.5525	55	1	121	85	0	10.7	4.43	138	7.43	176	33	27	72	-3.47341	80	371	8.25	100.198	2.09	3.01	0.96	0
137	1	160	59	23.0469	57	1	140	69	1	7	4.41	110	4.6	204	18	17	77	-2.96452	47	323	4.44	107.721	0.68	2.64	1.53	1
138	1	160	57	22.2656	71	1	113	60	0	7.9	3.5	113	5.22	155	16	24.2	59	-2.64248	63	309	7.78	90.4376	1.65	2.35	1.35	0
139	2	166	76	27.5802	55	1	139	97	1	9.6	4.65	144	6.25	165	11	13	59	-2.17269	58	387	4.51	110.965	3.77	1.36	0.73	0
140	1	183	63	18.8121	51	1	143	74	1	7.4	4.33	126	6.67	342	14	14	129	-3.02459	46	444	4.17	112.397	1.52	4.01	1.24	0
141	1	175	57	18.6122	80	1	172	74	1	8.4	4.1	116	6.58	163	10	14	108	-3.18788	43	358	6.4	95.3863	1.37	2.49	1.4	0
142	1	155	60	24.974	58	1	122	73	0	6.7	3.46	107	6.85	250	71	39	73	-3.10048	84	588	10.3	69.4282	1.5	1.01	0.58	0
143	1	158	51.5	20.6297	54	1	118	80	0	13.6	4.21	125	3.45	121	68	26	94	-2.53511	31	163	4.91	121.328	1.04	2.4	1.14	1
144	2	162	65	24.7676	50	1	114	71	0	8.9	4	118	5.39	129	16	12	119	-3.0184	52	166	5.4	118.308	1.48	1.43	1.1	0
145	2	171	95	32.4886	39	1	138	95	1	8.4	5.25	152	9.49	260	27	17	70	-3.80699	58	387	6.3	122.575	1.59	1.64	0.71	0
146	2	160	62	24.2187	63	1	133	83	0	9.7	5.14	158	9.3	201	26.6	23.5	80	-2.60036	88	316.2	7.35	85.0314	8.81	2.01	0.74	0
147	2	158	65	26.0375	63	1	161	79	1	8.4	4.56	140	7.58	209	17	11	92	-2.9759	52	310	6.3	109.119	4.05	2.63	0.88	0
148	2	165	80.5	29.5684	48	1	135	70	0	13.3	4.82	138	8.9	262	13	11	81	-2.78062	72	301	7.9	108.576	1.79	3.6	0.77	0
149	1	173	55	18.3768	79	1	172	104	1	11.4	4.05	126	6.99	222	14	13	104	-2.63723	75	172	5.71	69.8033	0.94	2.82	0.97	0
150	1	168	60	21.2585	66	1	136	69	0	6.9	3.42	109	6.48	142	19	41	61	-2.46952	55	290	5.7	98.0705	1.98	3.26	1.2	0
151	1	168	62	21.9671	55	1	151	98	1	10.8	4.3	123	6.93	150	29	20	75	-2.93794	42	211	4.58	112.066	0.98	3.41	0.67	0
152	1	176	70	22.5981	73	1	123	62	0	7.5	3.98	114	14.64	129	13	18	44	-2.87984	90	350	5.6	58.219	1.59	2.18	1.4	0
153	2	163	66	24.841	72	1	153	100	1	7.3	4.17	125	3.47	171	13	12	63	-2.62692	55	274	5.9	101.446	1.78	2.63	0.95	0
154	2	160	76	29.6875	59	1	138	94	1	8.9	4.72	154	5.05	187	30.6	29.3	94	-2.84742	50	280.4	7.34	113.201	4.52	3.06	1.09	0
155	1	166	66	23.9512	49	1	113	75	0	10.4	3.79	112	5.12	306	6	11	65	-2.74894	56	422	6.95	108.535	2.54	1.32	0.53	0
156	2	159	75	29.6665	49	1	123	87	0	8.1	4.88	143	5.75	120	21	18	62	-2.69505	62	467	7.2	112.888	3.58	1.63	0.59	0
157	2	175	91	29.7143	47	1	152	93	1	10.2	4.53	134	6.32	231	13.6	13.1	101	-2.5694	87	324.5	6.91	95.2251	1.89	3.13	0.97	0
158	2	174	80	26.4236	78	1	124	88	0	7.1	4.18	131	7.84	271	17	15	67	-3.35964	106	404	8.5	61.955	1.87	1.04	0.83	0
159	1	150	90	40	73	1	129	68	0	7.4	3.45	106	5.87	102	241	176	146	-2.5439	83	617	12.46	64.1596	2.52	1.13	0.87	0
160	2	150	60	26.6667	64	1	195	87	1	12.2	4.04	123	7.99	195	25	31	102	-3.25467	136	259	9.1	50.12	2.65	4.11	1.21	0
161	2	165	62	22.7732	71	1	102	71	0	6.3	4.32	138	8	229	21.4	23.2	107	-2.66553	87	656	8.37	82.0214	1.63	1.77	0.76	0
162	2	170	71	24.5675	79	1	158	100	1	7.8	4.12	130	4.84	109	13	18	57	-2.77531	71	326	5.5	89.9163	0.8	1.38	0.89	0
163	2	176	60	19.3698	75	2	108	73	0	6.8	4.92	143	7.1	163	12	13	47	-2.79211	76	210	6.3	90.3061	0.77	1.84	1.05	0
164	1	170	62	21.4533	90	1	132	78	0	8.8	4.34	130	12.6	240	18	23	59	-3.12273	115	328	11.54	39.0302	12.24	1.31	0.54	0
165	1	170	45	15.5709	79	1	98	65	0	12.1	3.28	111	10.61	292	83.7	92.3	206	-1.90648	71	243.9	10.32	74.5486	2.27	2.65	1.39	0
166	1	167	69	24.7409	66	1	178	94	1	9.2	3.33	100	3.56	152	18	15	43	-2.57003	54	305	7.77	98.5052	2.16	2.32	0.59	0
167	2	172	60	20.2812	59	0	176	82	1	15.5	3.9	111	14.23	242	21	17	126	-2.0207	209	430	12.19	30.8736	1.05	3.54	0.65	0
168	1	155	68	28.3039	54	1	161	85	1	6.5	4.11	122	5.27	157	13	13	114	-2.93554	38	208	3.8	115.518	1.24	3.88	0.98	0
169	1	160	66	25.7812	60	1	128	70	0	6.6	4.42	128	8.36	269	39	32.7	96	-2.60804	48	270.7	4.72	105.194	2.87	2.78	0.91	1
170	1	158	90	36.0519	51	1	143	86	1	10.8	4.52	131	5.63	195	23.3	16.3	100	-2.21588	41	254.9	6.64	115.558	2.86	3.27	0.96	0
171	2	165	67	24.6097	58	1	148	94	1	8.6	5.06	149	6.37	194	17	15	59	-2.88776	45	219	3.72	117.59	1.71	1.59	0.46	0
172	1	160	70	27.3437	56	1	105	64	0	6.2	4.15	121	6.53	223	14.3	16	68	-2.70607	45	372.6	4.6	109.535	1.26	3.06	1.16	0
173	1	166	62	22.4996	53	1	113	77	0	12.6	4.62	139	4.35	151	19.1	17.6	62	-2.30768	50	434.1	6.07	108.8	1.69	3.43	1.06	0
174	2	170	76	26.2976	45	1	110	85	0	7.7	5	147	9.55	195	8	12	40	-3.1675	102	475	5.6	79.663	1.6	2.78	0.91	0
175	2	156	59	24.2439	57	1	116	75	0	12.4	4.68	135	6.04	272	9.7	17.1	72	-2.53604	63	253.8	3.02	106.891	0.79	2.89	1.11	0
176	2	160	60	23.4375	66	1	110	80	0	10.8	3.57	108	4.35	168	12	18	87	-2.2393	66	178	10.51	99.662	0.93	2.64	0.71	0
177	1	178	49	15.4652	67	1	145	96	1	6.8	4.13	127	4.72	255	12.8	18.1	57	-2.46238	47	178.8	6.7	101.225	1.08	2.1	1.5	0
178	2	175	80	26.1224	71	1	116	72	0	9.2	4.91	148	6.56	330	21	26	105	-2.60894	53	332	5.1	103.227	1.44	4.39	0.78	0
179	1	165	58	21.3039	67	1	117	66	0	8.1	3.32	100	5.36	332	19	25	64	-2.17202	64	253.4	4.5	90.98	0.94	2.8	1.34	0
180	1	176	77	24.858	51	1	146	107	1	6.3	4.45	133	8.25	217	16	19	69	-2.74264	40	253	4.02	116.248	1.69	4.34	0.87	0
181	2	150	92	40.8889	57	1	173	90	1	7	4.39	141	4.48	86	59	48	68	-2.39044	74	363.6	5.1	101.82	3.59	0.57	0.88	0
182	1	178	63	19.8839	77	1	169	81	1	9.5	4.58	128	4.08	159	19	20	68	-2.89476	40	188	5.9	98.8914	0.78	2.4	1.17	0
183	1	168	75	26.5731	64	1	139	68	0	7.9	4.45	134	5.83	220	23	19	136	-3.22666	54	253	7	99.7381	3.02	2.63	1.06	0
184	1	168	55	19.487	76	1	132	78	0	7	3.25	95	9.43	286	10	13	63	-2.73938	134	678	10.47	35.4427	1.49	5.13	1.5	1
185	1	160	50	19.5312	72	1	117	75	0	7.9	4.16	122	4.47	179	33	26	119	-2.62249	41	160	5.47	101.41	2.28	1.75	0.92	0
186	2	154	85	35.8408	74	1	151	86	1	9.2	4.29	128	5.36	194	24	19	52	-2.75853	78	472	7.05	90.1594	0.89	2.96	1.15	1
187	2	170	112	38.7543	27	0	150	96	1	7.3	5.06	151	7.24	250	143.1	74.9	77	-3.05776	85	615.2	7.58	110.89	2.85	2.52	0.69	0
188	1	156	51	20.9566	68	1	140	79	1	7.8	3.46	103	6.77	194	17	26	68	-2.66591	93	418	11.1	57.7406	1.2	1.81	0.92	1
189	1	170	64	22.1453	84	1	119	81	0	8.4	3.34	110	6.74	186	24	18	63	-2.21307	63	159	6.01	83.4134	1.68	4	1.15	0
190	1	155	83	34.5473	67	1	150	93	1	9.2	3.61	112	9.02	218	16	18	105	-2.74588	49	402	5.28	100.214	2.44	3.09	1.04	0
191	2	165	68	24.977	55	1	122	82	0	6.8	5.19	157	9	183	26	26	70	-3.48024	85	233	7.2	93.1674	1.61	2.09	0.99	0
192	1	156	45	18.4911	75	1	152	72	1	5.5	4.08	127	5.93	150	18.3	24.6	75	-2.44491	55	339.1	4.83	92.732	1.4	2.75	1.34	0
193	2	168	68	24.093	70	1	138	81	0	11.2	4.38	130	3.74	253	18	17	88	-2.38084	53	190	4.44	103.871	0.76	2.28	0.91	1
194	1	164	42	15.6157	81	2	107	67	0	6.1	3.57	96	4	159	10.3	19	57	-2.29694	100	246.6	4.75	48.8144	0.63	1.66	0.99	0
195	1	160	76	29.6875	61	1	138	85	0	10.3	3.83	119	7.28	143	13	17	80	-2.47972	66	399	8.67	91.0154	1.42	3.05	1.1	1
196	1	162	60	22.8624	60	1	155	103	1	8.5	4.56	136	7.41	224	16	15.8	79	-2.41704	54	191.6	7.68	102.25	0.77	3.11	0.79	0
197	2	170	80	27.6817	70	1	126	69	0	8.1	4.8	134	7.56	346	37	23	104	-3.10194	116	319	12	58.4389	1.49	2.97	1.04	0
198	1	166	56	20.3223	62	0	156	92	1	5.7	3.6	101	5.36	231	12.2	18.1	67	-2.15079	86	270.9	7.99	65.8368	1.04	1.79	0.88	0
199	2	172	70	23.6614	63	1	156	84	1	8.6	5.15	140	6.84	147	26	19	131	-3.03881	128	515	9.8	54.2384	2.35	1.62	0.81	0
200	2	165	94	34.5271	28	0	160	112	1	5.2	5.74	170	6.67	219	20	18	70	-3.2458	62	347	4.08	128.638	1.21	3.25	0.83	1
201	2	176	63	20.3383	57	1	103	56	0	9	4.61	146	3.71	81	26.9	31	103	-1.96352	62	431.1	6.12	107.408	0.91	1.86	1.34	0
202	2	171	68	23.255	49	1	137	91	1	9.3	4.93	161	6.77	204	24.8	16.9	98	-3.0176	56	417	5.8	116.412	2.4	2.77	0.63	0
203	2	155	67	27.8876	55	1	154	79	1	7.9	4.97	153	6.92	181	28.1	20.9	128	-2.655	73	279.6	6.07	103.519	1.18	3.2	1.08	0
204	2	150	76	33.7778	57	1	96	74	0	11.6	4.49	138	6.58	158	11.1	20.2	63	-2.73338	78	301.8	6.89	100.214	0.74	2.76	1.13	0
205	2	165	73	26.8136	51	1	123	82	0	7.3	4.56	132	7.45	186	23	16	69	-3.14976	71	316	8.3	107.02	3.32	2.05	1	0
206	1	160	55	21.4844	71	2	198	91	1	6.5	3.99	112	6.85	150	29	34	109	-2.96974	85	324	7.13	63.1328	0.76	1.14	1.21	0
207	2	170	76	26.2976	61	1	128	76	0	8.4	4.32	134	5.32	198	24	21	63	-2.48089	47	278	6.94	113.91	0.86	1.5	0.87	0
208	2	158	75	30.0433	74	1	130	82	0	7.9	4.05	128	4.08	168	16	13.9	82	-2.57118	73	399.2	5.58	91.9814	1.23	2.98	1.09	0
209	2	155	65	27.0552	50	1	143	93	1	7.6	4.45	137	6.87	253	25	17	82	-3.40821	62	247	5.3	112.188	2.09	1.04	0.82	0
210	1	170	54	18.6851	72	1	140	81	1	5.6	3.66	120	3.02	173	22	36	59	-2.4671	63	383	6.86	89.8769	0.82	2.28	1.23	0
211	2	150	87	38.6667	45	1	99	68	0	6.7	4.98	138	8.26	199	13	11	111	-2.9308	57	293	4.9	118.708	2.64	0.85	0.61	0
212	1	160	64	25	67	1	133	85	0	6.5	3.82	117	4.53	182	11.4	15.8	50	-2.84779	60	320.8	6.38	95.44	1.42	3.39	1.06	1
213	2	170	69	23.8754	46	1	138	92	1	12.1	4.38	140	8.33	159	33	16	139	-2.19355	86	258	8.85	97.1578	1.76	2.82	1.47	0
214	2	160	58	22.6562	51	1	110	72	0	5.8	4.16	130	4.1	199	41	20	67	-2.57692	53	213	4.51	116.9	1.23	2.65	0.79	0
215	2	165	55	20.202	30	2	87	63	0	8.2	3.77	114	9.79	268	16	20	103	-2.1146	108	359	10.1	81.6551	2.38	3.34	1.07	0
216	2	168	115	40.7455	48	1	147	90	1	6.1	4.15	126	4.99	130	62.4	46.4	83	-2.693	42	353.5	4.62	127.77	1.31	2.14	1.06	0
217	2	183	82	24.4857	55	1	126	90	1	7	4.21	123	6.07	206	14.1	17	101	-2.60514	91	539.2	6.22	85.8454	2.8	1.88	1.01	0
218	1	187	53	15.1563	75	1	144	76	1	10.4	4.37	129	8.8	358	69	30	165	-3.24586	88	381	11.9	59.071	2.17	1.6	1	0
219	2	170	101	34.9481	24	0	139	93	1	9.5	5.62	162	8.23	217	141.1	73.1	103	-3.11588	76	642.7	5.42	124.013	2.71	2.69	0.92	1
220	2	169	83.5	29.2357	57	1	125	81	0	5.9	4.09	129	3.06	109	18.8	19.3	75	-2.4295	70	332.4	6.15	103.543	0.91	1.54	0.87	0
221	1	159	45	17.7999	76	1	128	66	0	8.5	4.02	111	7.9	119	12	15	57	-3.06652	82	282	8.78	63.8963	1.52	1.58	0.69	0
222	1	156	53	21.7784	52	1	116	74	0	7.2	3.46	102	10.62	367	2.6	10.8	63	-2.37917	49	281.3	5.62	110.013	1.7	2.96	0.58	0
223	1	165	55	20.202	81	1	142	66	1	8.6	3.78	120	7.08	167	20	26	99	-3.28456	89	268	9.1	56.1409	1.28	2.79	1.24	0
224	2	155	55	22.8928	67	1	153	66	1	6.2	4.5	124	6.29	177	38	43.5	138	-1.87118	134	556	11.98	50.0759	0.77	1.87	0.99	0
225	2	178	70	22.0932	59	1	119	75	0	9.7	4.86	130	10.86	239	13	13	173	-2.72174	86	399	9	89.6117	1.14	1.33	0.73	0
226	2	167	70	25.0995	53	1	116	83	0	7.4	5.46	150	9.81	96	14	16	86	-2.78466	58	387	4.69	112.354	4.75	1.84	0.66	0
227	2	156	74.5	30.6131	44	1	111	81	0	10.9	5.7	180	7.53	194	18	18	132	-3.39944	70	380	4.96	112.262	11.86	1.9	0.66	0
228	1	170	74	25.6055	63	2	147	86	1	7.3	4.14	127	6.58	274	35	19	85	-3.17092	40	236	4.39	107.888	1.24	2.63	0.98	0
229	1	163	55	20.7008	77	1	115	68	0	8.2	4.02	112	12.14	180	26	178	74	-2.47411	121	417	12.66	39.8116	1.62	2.28	0.92	0
230	1	171	103	35.2245	54	1	155	107	1	5.8	4.16	124	5.62	78	46.6	44.9	121	-2.67074	60	294.6	5.71	103.477	1.56	2.74	1.08	0
231	2	175	65	21.2245	56	1	121	75	0	10.6	4.27	134	7.19	108	390	266	93	-2.28638	67	508	9.4	105.576	0.91	2.31	0.53	0
232	2	175	80	26.1224	61	1	157	81	1	9.9	4.57	137	9.71	142	26	32	57	-2.53508	64	418	4.1	103.77	1.34	2.8	0.81	0
233	1	168	59	20.9042	64	1	136	75	0	7.6	3.93	119	6.51	261	16	19	64	-2.64952	47	224	4.66	103.132	1.37	2.79	0.92	0
234	2	168	68	24.093	78	1	143	85	1	6.3	4.68	145	5.82	252	47.1	30.3	75	-2.58289	62	361.2	5.34	94.2578	2.13	2.66	1.02	0
235	2	167	65	23.3067	83	1	144	76	1	7.4	3.56	76	3.87	153	9	21	37	-2.29824	154	442	13.19	38.3631	1.44	2.87	0.8	0
236	2	168	62	21.9671	50	1	144	95	1	9.7	5.22	142	4.73	119	30.2	29.2	51	-2.33098	70	363.8	7.48	108.15	1.14	3.1	1.24	1
237	2	150	68	30.2222	87	1	140	70	1	8.5	3.55	109	6.03	159	15	15	79	-2.3707	93	308	7.1	68.5417	2.06	2.11	0.64	0
238	2	175	83	27.102	56	1	140	97	1	7.9	4.93	148	8.42	177	41	18	81	-2.65802	55	293	5.44	112.06	1.49	2.91	0.73	1
239	1	150	63	28	53	1	150	90	1	8.8	4.03	123	3.87	156	13	20	94	-2.76397	49	247	6.87	109.331	1.01	2.38	1.66	1
240	2	173	73	24.3911	53	1	116	89	0	7.2	4.91	150	6.47	148	45	23	49	-2.54806	70	298	8.62	106.151	2.17	2.07	0.84	1
241	1	162	75	28.578	78	1	156	76	1	7.5	3.12	67	4.62	234	8	12	79	-2.84306	144	302	14.54	32.1082	0.75	2.04	1.61	1
242	2	178	92	29.0367	55	1	142	84	1	8.5	4.42	136	7.14	287	21.5	15.8	77	-2.81328	56	282.6	3.93	112.148	2.26	1.62	0.79	0
243	1	160	54	21.0937	56	1	163	90	1	7.3	4.67	124	8.4	345	47	31	138	-2.74003	33	281	5.25	118.036	2.4	2.25	0.66	0
244	2	175	70	22.8571	58	1	136	72	0	6.5	4.51	140	6.54	245	23	24	47	-2.9465	84	318	8.53	92.7531	0.75	2.4	1.12	1
245	2	175	60	19.5918	47	1	113	91	1	7.5	4.32	126	2.33	137	48	26	70	-2.65972	70	300	5.5	110.187	0.59	2.14	1.13	0
246	1	156	56.5	23.2166	75	1	151	83	1	8.2	3.28	92	6.95	269	10.7	13.2	83	-1.8639	77	337.9	7.4	69.337	0.84	2.34	0.97	0
247	2	163	53	19.9481	78	1	155	78	1	6.5	3.76	113	4.46	206	13.8	16.8	41	-2.51923	67	379.9	6.74	92.0757	0.6	1.62	1.42	0
248	1	162	49	18.6709	58	1	142	79	1	10.8	4.59	131	6.63	261	27.6	22	175	-2.87106	63	422.4	6.71	98.0533	2.99	2.85	1.4	0
249	2	185	93	27.1731	43	1	109	75	0	9.7	4.95	147	8.17	199	18	14	70	-3.35256	63	236	5	116.615	2.92	4.1	0.97	0
250	2	170	70	24.2215	72	1	144	81	1	8.4	3.77	86	4.43	288	13	20	41	-2.38794	75	248	7.03	92.3756	0.78	1.82	0.7	1
251	2	172	62	20.9573	72	1	153	80	1	7.5	4.46	135	6.07	170	15	21	77	-3.26657	90	328	10.6	78.2634	1.04	3.41	1.26	0
252	2	164	65	24.1672	70	1	133	83	0	7.2	4.72	154	5.57	160	24	20	56	-2.57671	90	348	8.26	79.2429	1.61	1.98	0.84	0
253	2	170	80	27.6817	49	1	135	99	1	8.6	4.79	134	5.73	268	25	15	49	-3.02721	56	458	4.3	116.412	9.72	2.29	0.77	0
254	1	162	65	24.7676	68	1	151	82	1	6.8	3.98	119	9.23	285	12	13	102	-3.33658	79	277	10.8	70.2277	2.01	3.01	1.2	0
255	2	177	90	28.7274	62	1	137	80	0	7.1	3.88	121	5.92	117	108	49.2	66	-2.38147	77	323.2	4.5	97.5249	2.22	1.9	0.9	0
256	2	168	80	28.3447	72	1	137	90	1	6.5	4.66	145	6.16	203	15.4	15.3	65	-2.54992	64	308.7	4.36	96.9079	1.34	2.88	1.39	0
257	2	175	84	27.4286	58	1	122	84	0	7.4	4.3	130	4.94	119	54	22	73	-2.63698	67	354	6	104.271	3.01	2.55	0.95	0
258	1	153	62	26.4855	75	1	146	90	1	8.5	3.86	129	7.08	185	54	78	87	-2.89257	47	170	4	96.3122	2.24	3.98	1.09	0
259	2	160	57	22.2656	59	1	116	80	0	6	4.76	157	5.17	196	17	22	61	-3.00632	84	313	5.5	92.178	1.46	2.99	0.73	0
260	1	155	89	37.0447	56	1	160	89	1	7.8	3.41	98	4.77	208	12	12	49	-3.4974	81	390	7.7	73.4329	2.4	2	1.1	0
261	2	173	90	30.0712	48	1	131	82	0	10.2	4.97	150	6.21	213	22	18	56	-3.0199	102	488	9.3	78.1904	6	3.71	0.85	0
262	2	174	78	25.763	60	1	102	68	0	7.7	4.37	144	7.52	155	34.2	35	90	-2.27844	59	232.7	4.55	107.014	0.75	2.35	0.71	0
263	2	168	58.5	20.727	51	2	137	86	0	9	3.84	130	4.37	189	18.5	16.5	87	-2.6805	62	318.2	4.1	111.492	1.11	2.54	0.95	0
264	1	160	72	28.125	53	1	116	80	0	12.6	4.46	119	6.2	175	19	17	96	-2.16862	154	400	8.55	34.606	2.26	1.74	0.74	0
265	1	155	63	26.2227	64	2	132	84	0	7.6	4.49	139	8.56	219	10	14	83	-3.68918	65	264	6.9	90.9848	1.22	1.45	0.9	0
266	1	158	56.5	22.6326	87	2	160	78	1	7.9	3.11	101	5.71	256	11.2	21.1	72	-2.36749	68	324.3	5.06	74.7018	0.77	2.22	1.05	0
267	1	155	67	27.8876	74	1	120	75	0	6.4	4.39	114	4.82	160	15	20	55	-2.4217	44	288	7.14	98.4659	1.05	2.68	0.95	1
268	1	158	67	26.8386	67	1	157	88	1	12	4.1	121	6.37	353	23.4	21	102	-2.66566	44	238.9	4.58	102.847	2.23	2.17	0.95	0
269	2	170	70	24.2215	61	1	123	71	0	9	4.73	147	7.63	244	33	20	62	-2.84296	75	472	6.1	98.9164	1.73	1.91	0.83	0
270	1	157	50	20.2848	55	1	126	76	0	6.5	4.05	102	4.66	329	7.4	16.5	58	-2.7919	42	392	4.35	112.066	1.23	3.82	1.28	0
271	1	148	44	20.0877	80	1			0	9.2	4.01	119	5.88	297	17	21	114	-2.33349	62	266	6.32	87.1723	2.02	2.57	0.96	0
272	2	168	85	30.1162	32	1			0	11.2	4.83	138	4.36	239	44.5	31.7	65	-2.87874	70	358.4	5.39	120.961	2.24	2.77	0.88	1
273	2	176	75	24.2123	54	1	133	85	0	9.7	5.46	161	4.73	127	17	19	93	-2.41074	62	240	6.89	109.431	0.84	3.21	0.88	0
274	2	172	76	25.6896	44	1	110	90	1	9.8	4.87	154	5.37	254	16	21	45	-2.4283	64	433	5.83	115.342	1.94	2.1	0.57	1
275	2	169	75	26.2596	57	1	156	96	1	6.5	4.77	155	11.07	241	17	15	63	-3.06323	67	404	4.71	104.922	5.19	1.41	0.68	0
276	2	176	81	26.1493	50	1	115	75	0	8.5	4.45	135	4.78	179	41	23	47	-2.56367	69	354	5.15	108.621	4.24	1.48	0.62	0
277	2	176	67	21.6296	37	1	116	78	0	6.4	4.68	135	9.8	313	35	26	91	-3.1987	50	238	5.4	129.799	1.83	0.33	0.87	0
278	2	175	65	21.2245	73	1	129	84	0	6.8	4.2	130	6.29	133	13	11	69	-2.15298	84	409	7.88	84.4916	0.71	2.55	1.26	1
279	1	165	67	24.6097	71	1	163	90	1	8.3	3.92	115	6.81	147	9	12	110	-2.35147	64	264.8	4.6	88.7446	2.72	2.24	1.24	0
280	2	175	80	26.1224	54	1	125	73	0	8.6	4.32	149	7.19	170	13.8	16	86	-2.56224	55	290	7.3	113.463	2.99	3.54	1.13	0
281	1	155	61	25.3902	53	1	122	78	0	7.3	4.23	124	7.44	160	23	25	74	-3.04549	45	371	8	111.598	2.31	3.12	1.13	0
282	2	179	94	29.3374	55	1	170	84	1	8.1	4.78	141	9.49	234	14	17	97	-2.70924	81	332	7.5	98.7153	1.08	2.49	0.77	1
283	1	160	69	26.9531	70	1	152	96	1	6.3	4.79	133	9.38	209	19	21	84	-2.77298	53	304	6.7	96.5187	0.81	2.01	1.42	1
284	2	169	76	26.6097	64	1	137	100	1	8.1	4.38	137	4.57	151	9	15	39	-2.5691	48	308	4.29	111.096	1.05	1.71	1.33	0
285	2	171	75	25.6489	54	1	135	98	1	9.9	4.84	138	4.84	183	19.4	17.2	57	-2.8367	52	297.4	5.42	115.401	2.68	3.03	1.03	0
286	1	160	68	26.5625	58	1	132	86	0	9	4.41	119	5.52	195	14	15	69	-2.94349	50	239	5.97	105.468	1.86	2.96	0.78	0
287	2	175	92	30.0408	56	1	131	88	0	7.7	4.96	160	6.78	251	14.1	11.2	88	-2.32822	84	301	5.82	93.914	2.07	3.84	1.03	0
288	1	155	64	26.6389	72	1	132	85	0	10.8	4.25	130	7.58	231	20.7	15	161	-2.54211	59	238.9	8.32	92.8933	1.65	4.25	1.43	1
289	2	174	80	26.4236	67	1	100	61	0	5.7	4.79	149	6.77	136	16	18	59	-3.26786	105	407	6.1	67.1008	1.16	2.29	0.99	0
290	2	169	75	26.2596	83	1	155	82	1	9.6	3.38	116	4.15	119	13	12	74	-2.37142	70	356	6.57	88.0836	0.73	1.23	0.6	1
291	2	172	77	26.0276	34	1	115	81	0	8.5	5.27	157	6.46	237	36	22	116	-2.9496	76	269	5.2	116.535	1.45	0.9	0.73	0
292	2	165	75	27.5482	45	1	129	92	1	8.2	5.35	152	7.5	252	14.9	12.7	60	-2.44736	66	347.4	5.21	113.567	2.43	2.37	0.88	0
293	1	163	57	21.4536	60	1	146	66	1	6.4	3.89	116	6	211	14	17	60	-2.51178	54	274	5.41	102.25	0.71	3.25	1.09	1
294	2	176	115	37.1255	48	1	158	96	1	9.1	4.91	144	7.27	166	90	45	110	-2.46635	58	416	5.32	115.903	1.23	2.91	0.67	0
295	2	178	93	29.3524	30	1	136	88	0	12.4	4.75	147	9.36	279	52	41	93	-2.36549	47	317	3.69	138.132	0.85	1.12	0.45	0
296	1	163	52	19.5717	72	0	146	82	1	10	3.57	117	3.68	124	32.5	18.6	123	-2.26322	44	121	4.13	99.6983	0.95	0.9	0.88	0
297	2	166	61	22.1367	73	1	118	62	0	10.7	2.6	73	2.81	98	20	17.4	72	-2.0477	104	319.5	9.63	65.3896	0.61	1.51	0.78	0
298	1	158	72	28.8415	75	1	148	75	1	6.9	4.31	125	5.5	188	10	14	72	-3.2185	64	321	6.66	86.5641	2.1	1.74	0.94	0
299	1	155	53	22.0604	66	1	131	87	0	7.3	3.98	125	7.59	271	40	28	62	-3.09446	46	266	4.49	102.386	2.06	3.01	0.81	1
300	2	176	73	23.5666	59	1	114	78	0	6.1	4.53	132	4.69	147	19	19.5	63	-2.78266	72	317	5.82	101.397	0.96	2.5	0.99	0
301	2	173	67	22.3863	25	0	127	79	0	10.9	5.12	152	5.9	238	17.2	11.4	74	-2.72272	56	363.5	3.75	135.151	2.66	2.13	0.95	1
302	2	177	96	30.6425	29	1	136	84	0	9.3	4.85	151	7.83	248	24	14	96	-3.05188	44	378	6.1	141.79	2.52	2.97	1.18	0
303	1	156	50	20.5457	59	1	117	78	0	13.1	3.95	118	4.2	131	12	14	95	-2.68661	36	224	5.04	113.45	1.54	2.58	0.83	0
304	1	156	62	25.4767	49	1	118	80	0	7.7	4.31	80	7.45	373	29.4	19.8	108	-2.89492	51	324.4	5.95	111.009	3.02	2.28	0.97	0
305	1	155	67	27.8876	51	1	131	90	1	8.2	4.36	131	4.65	140	23	17	92	-3.12466	39	314	5.15	116.959	1.63	1.1	1.35	1
306	1	163	63.5	23.9	55	1	176	107	1	10.7	4.75	141	7.07	363	128	86	106	-3.46532	41	312	4.93	112.719	2.17	4.79	1.16	0
307	2	183	80	23.8884	48	1	112	81	0	7	4.53	139	5.83	192	11	12	44	-2.58535	65	255	5.64	111.982	0.92	1.51	0.99	0
308	1	155	65	27.0552	55	1	140	83	1	7.6	4.66	130	6.51	161	20.5	19.5	43	-2.62953	46	414.9	5.21	109.636	1.24	1.75	0.93	0
309	2	165	54	19.8347	57	0	110	60	0	5.2	2.33	76	5.39	131	34	25	49	-3.0252	213	394	15.15	30.5569	1.71	2.32	1.06	1
310	2	179	75	23.4075	56	1	139	79	0	7.2	4.5	134	6.41	197	19	16	76	-3.54394	95	421	10.3	81.0209	0.92	2.65	0.82	0
311	1	148	41	18.718	59	1	116	76	0	10.5	3.16	109	9.49	149	12	27.2	86.7	-1.58247	27.3	241.6	1.81	121.271	8.03	1.86	0.37	1
312	2	180	87	26.8519	61	1	174	96	1	7.2	5.15	151	6.07	174	29.2	16.4	60	-2.69505	62	242.1	4.48	104.769	2.09	1.96	0.89	0
313	2	180	61	18.8272	57	1	96	64	0	7.9	3.5	108	6.93	138	9	9	47	-1.53061	52	243	8.2	113.268	1.49	2.94	1.87	0
314	1	150	70	31.1111	51	1	109	70	0	7.5	3.5	114	4.55	139	105	108	66	-2.79509	51	370	4.98	109.637	1.35	2.84	0.89	0
315	1	156	77	31.6404	81	2	135	69	0	7	4.52	137	7.88	166	36	26.7	83.6	-3.0801	59.6	274.6	6.41	87.6227	1.18	1.77	0.96	0
316	2	177	80	25.5354	65	1	108	62	0	8	4.26	130	5.16	160	20.5	19	58	-2.58442	76	318.6	6.19	96.1008	0.99	2.42	1.09	0
317	1	163	69	25.9701	54	1	150	89	1	6.9	3.67	109	8.98	121	15	14	67	-2.40866	69	631	8.3	90.1272	4.16	2.98	0.9	0
318	2	168	68	24.093	59	1	169	112	1	10.8	4.91	151	7.57	269	29	31.7	71	-3.15646	52	328	6.64	111.868	1.72	3.95	1.58	0
319	1	160	69	26.9531	59	1	137	85	0	7.4	4.03	116	6.99	207	9.9	20.1	55	-2.49739	52	427.5	4.09	103.828	1.38	1.98	0.77	0
320	2	165	63	23.1405	56	1	103	73	0	6.7	5.17	160	5.79	148	23.2	20.5	68	-2.86103	71	327.9	8.46	103.744	2.37	1.93	0.81	1
321	1	162	72	27.4348	49	1	159	107	1	7.4	5.43	112	9.51	374	98.5	53.2	81	-2.97952	45	253.6	4.54	114.409	1.98	3.96	1.18	1
322	2	160	57	22.2656	51	1	122	84	0	13	4.46	137	4.06	160	34	22	125	-3.0585	64	377	5.7	110.428	3.37	2.74	0.81	0
323	2	171	68	23.255	49	1	128	88	0	8	4.16	136	5.67	239	20	17	69	-2.81724	65	296	5.12	111.288	0.86	2.97	0.86	0
324	1	168	67.5	23.9158	57	1	125	82	0	9.4	4.69	121	6.11	192	25	17	91	-2.68966	51	243	5.14	105.621	0.99	2.62	1.23	0
325	2	167	90	32.2708	61	1	167	102	1	7.1	5.29	150	5.37	165	16	14	63	-3.09344	72	314	7.4	100.143	1.36	2.15	1.13	0
326	2	175	86	28.0816	58	1	145	95	1	7.4	5	153	5.13	211	16.9	20	43	-2.37978	65	225.1	5.04	105.23	0.78	1.97	1.02	0
327	2	170	80	27.6817	32	1	133	86	0	9.6	4.7	144	8.01	237	100	55	94	-3.06415	56	443	4.24	129.394	6.38	3	0.71	1
328	2	168	69	24.4473	57	1	142	82	1	8.4	4.59	139	9.59	257	8.8	11.5	100	-2.47976	45	214.3	4.35	118.323	1.04	2.16	0.62	0
329	2	165	58	21.3039	60	1	145	82	1	7.3	4.14	129	5.41	165	14	14	104	-2.5543	56	200	7.95	108.714	1.02	3.08	1.08	0
330	2	170	55	19.0311	81	1	130	69	0	10.2	5.19	150	10.07	187	13	18	58	-2.42638	79	308	10.92	85.9871	1.24	2.71	0.73	1
331	2	173	74	24.7252	60	1	108	76	0	6.2	4.6	136	5.36	193	11	16	66	-2.96656	80	324	6.88	97.1301	1.96	1.95	0.89	1
332	1	158	52.5	21.0303	66	1	141	76	1	7.1	2.55	89	1.73	33	13	14.9	43.3	-2.68904	61.8	257.5	7.85	95.3537	2.87	2.59	1.04	0
333	2	169	68	23.8087	61	1	119	83	0	9.6	5	151	5.93	191	16.1	14.9	96	-2.70324	75	427.6	7.22	98.9164	3.14	2.67	0.86	0
334	2	169	73	25.5593	65	1	135	77	0	9.4	3.8	100	11.64	242	18	13	134	-2.91874	88	357	3.8	83.9803	1.3	1.66	0.6	0
335	1	159	51	20.1733	69	1	130	71	0	8.4	3.82	121	5.01	200	20	19	103	-3.18608	87	313	8.27	62.1637	1.35	1.5	0.75	0
336	1	165	64	23.5078	52	1	145	84	1	10.2	4.21	128	3.63	251	20	23	77	-2.66373	53	267	4.49	107.952	0.72	2.31	1.09	1
337	1	144	60	28.9352	55	1	142	98	1	10.4	4.4	139	4.73	149	36	25	91	-2.49353	42	202	4.91	112.066	1.74	4.43	0.81	1
338	1	160	63	24.6094	56	1			0	7.2	4.29	127	5.85	249	16.1	15.8	53	-2.53715	40	195	4.68	112.688	2.18	2.23	0.95	1
339	2	160	72	28.125	66	1	166	77	1	6.8	3.42	96	8.22	169	26	24	95	-2.26253	156	516	11.92	41.9862	1.03	1.35	0.92	0
340	2	168	52	18.424	52	1	130	83	0	14.8	4.12	117	6.18	233	11	7	55	-2.62567	78	277	9.32	103.379	1.87	3.07	1.5	0
341	1	159	54	21.3599	52	1	103	74	0	6.5	3.73	116	5.44	261	12	9	51	-1.53868	47	251	7.7	111.123	1.4	5.16	2.52	0
342	2	170	71	24.5675	60	1	130	93	1	10.6	5.02	156	8.15	138	23.2	16.6	126	-2.44935	84	371.1	6.32	91.6065	1.73	2.01	0.94	1
343	1	150	59	26.2222	71	1	134	66	0	9.1	4.13	123	5.85	166	12.2	15.3	91	-2.42726	73	431.8	7.53	75.7827	1.11	2.11	1.13	1
344	2	176	71	22.921	55	1	128	79	0	6.9	4.32	137	5.23	214	24.8	18.5	131	-2.5788	63	359.9	5.1	108.229	0.89	2.27	1.14	0
345	2	175	65	21.2245	84	1	134	76	0	8.3	3.82	115	4.34	201	14	30	79	-2.89932	96	384	6	67.2221	0.95	0.95	1.05	0
346	2	185	103	30.095	31	1	136	67	0	9.4	6.45	175	7.88	368	41	34	159	-3.37053	83	524	10.6	111.301	2.11	2.44	1.08	0
347	1	155	65	27.0552	69	1	125	87	0	6.5	3.48	95	11.73	278	14	22	59	-3.08047	57	330	3.2	95.4327	2.39	2.69	0.86	0
348	1	165	67	24.6097	68	1	106	73	0	7.4	4.54	126	6.18	234	27	25.7	104	-2.553	72	276.4	5.93	78.4986	2.08	2.54	1	0
349	2	180	63	19.4444	38	1	130	81	0	8.3	4.39	127	9.79	334	19	16	64	-2.77531	65	391	4.7	119.168	3.15	2.65	0.71	0
350	2	180	90	27.7778	59	1	114	78	0	7.6	4.32	135	5.39	151	21	18	48	-2.88457	63	418	6.2	105.569	1.78	2.15	0.75	0
351	1	164	64	23.7954	61	1	170	86	1	11.7	4.02	118	3.66	142	10.6	12.6	77	-2.19498	55	296.2	5.74	101.168	4.21	2.7	1.04	0
352	2	170	75	25.9516	59	1	185	119	1	11.7	5.26	160	19.88	193	13	8	89	-2.7095	68	211	8.06	103.162	1.06	1.42	1.02	0
353	2	175	81	26.449	48	1	128	80	0	9.7	4.7	146	7.24	168	33.9	26	92	-2.25228	73	503.7	4.51	108.125	4.13	2.91	0.92	0
354	2	167	76	27.2509	55	1	136	85	0	7	5.36	162	6.68	174	15.5	17.8	82	-2.29988	55	247.4	6.57	112.76	1.9	2.58	1.38	0
355	2	175	80	26.1224	67	1	146	86	1	8.4	3.83	121	6.23	221	17	19	75	-3.11616	83	423	7.07	88.9735	1.04	1.07	0.93	1
356	2	172	70	23.6614	58	1	127	81	0	6.8	4.6	137	4.65	197	15.9	16.2	53	-2.87052	61	273	7.33	107.268	1.89	1.77	0.9	0
357	2	173	86	28.7347	72	1	151	71	1	13.3	4.45	120	8.04	276	12.2	12.3	118	-1.85356	99	413.4	5.92	69.8051	1.55	2.25	0.8	0
358	2	184	87	25.6971	28	1	122	86	0	12.8	5.24	153	8.62	261	12	7	145	-3.74618	65	367	6.63	126.815	2.49	2.44	0.64	0
359	1	154	55	23.1911	72	1	144	80	1	7.3	3.69	114	7.3	251	13	13.5	99	-2.29258	62	325.1	8.54	91.6192	1.62	3.28	1.32	1
360	1	161	56	21.6041	55	1	116	85	0	6.3	4.78	143	4.96	215	18	17	69	-2.86902	53	274	5.9	105.956	1.05	3.35	1.12	0
361	2	167	66.5	23.8445	76	1	143	77	1	9	5.02	144	5.69	126	21	27.2	70	-2.95466	74	269	7.01	90.4719	0.64	1.31	0.79	0
362	1	162	75	28.578	65	1	138	73	0	6.1	4.16	121	5.37	203	16.8	18.5	39	-2.65318	49	336.4	5.62	101.468	0.65	2.79	1.51	0
363	2	170	65	22.4913	56	1	129	72	0	6.1	5.2	158	5.41	215	48	31	61	-3.12338	64	356	5.83	107.047	1.23	2.44	0.84	1
364	1	160	53	20.7031	56	1	157	88	1	13.1	4.28	119	5.68	191	13.6	16.7	89	-2.59852	42	235.1	9.36	111.371	1.21	3.37	1.94	0
365	1	155	69	28.7201	56	1	117	85	0	8.6	4.32	127	4.26	160	29.5	21.8	49	-2.64653	46	395.6	6.02	108.956	1.39	2.3	1.05	0
366	1	154	75	31.6242	77	1	160	73	1	9.7	3.52	102	6.52	313	8	16	116	-2.66844	80	365	10.39	65.4099	0.99	2.2	0.98	0
367	1	155	50	20.8117	65	1	155	92	1	8.6	4.24	122	10.41	286	13.1	17.9	79	-2.8178	47	255.6	5.29	102.492	0.78	1.49	1.01	1
368	2	170	68	23.5294	55	1	139	92	1	7.2	4.29	130	5.12	133	32	20	59	-2.68592	57	295	5.06	111.55	1.57	1.26	0.69	0
369	1	167	64	22.9481	62	1	127	68	0	9.8	3.89	118	6.02	207	12.3	15.2	90	-2.51724	40	162.6	5.92	108.561	1.39	1.41	0.93	0
370	1	150	70	31.1111	74	1	135	79	0	8	3.93	118	6.59	165	25	36	61	-2.85007	54	268	3.8	93.724	3.07	1.71	1.07	0
371	1	155	65	27.0552	69	1	139	79	0	9.8	4.27	128	7.48	240	8	14	141	-3.45849	43	238	6.4	102.14	2.09	4.13	1.35	0
372	2	162	80	30.4832	59	1	128	80	0	7.3	4.66	135	5.74	197	21.5	17.1	98	-2.4468	63	356.3	4.53	105.569	1.54	2.62	0.83	0
373	2	170	66	22.8374	62	1	110	74	0	6.5	4.69	145	6.77	137	84	25	76	-2.6492	125	572	11	56.1523	2.78	2.65	0.93	0
374	1	152	57	24.6711	78	1	130	70	0	7.1	4.02	120	6.93	156	25	33	86	-3.31612	59	315	4.8	89.4908	2.95	1.97	1	0
375	2	170	69	23.8754	47	1	153	95	1	7.1	4.85	123	7.23	200	11	8	79	-3.41957	43	104	6.7	127.657	1.67	1.67	1.11	0
376	2	172	70	23.6614	28	0	134	90	1	12.9	5.19	160	7.66	169	28.3	70.7	80	-2.96452	51	219.9	5.63	136.453	31.2	0.68	1.97	0
377	1	166	58	21.048	75	1	158	80	1	11.8	3.82	113	5.3	115	27.7	21.2	83	-2.72748	79	308.5	8.1	67.2359	2.99	1.69	1.08	0
378	2	170	69	23.8754	75	1	126	68	0	6.3	4.44	106	6.06	209	22	24.1	66	-2.27918	80	380.2	7.29	88.4787	1.21	1.69	1.32	0
379	1	164	100	37.1802	41	1	168	94	1	10.4	4.34	131	10.65	244	15	21	103	-2.04674	48	349	2.8	118.389	2.53	2.84	0.79	0
380	1	155	73	30.385	82	2	104	51	0	7.3	4.05	111	7.34	232	6	13	80	-3.31166	67	244	9.2	78.4435	1.85	2.01	0.85	0
381	1	153	56	23.9224	73	2	130	89	0	5.8	4.14	114	7.56	221	14.6	24	91	-2.35052	38	261.2	5.21	102.643	0.82	1.78	1.77	0
382	1	158	65.5	26.2378	67	1	120	70	0	7.9	4.3	136	4.32	115	21	18	105	-2.7828	57	216	5.2	96.6271	1.33	1.71	1.15	0
383	1	165	56	20.5693	54	1	137	95	1	7.5	4.71	138	4.09	109	14.5	16.8	98	-2.80436	45	201.4	7.65	110.906	1.2	2.12	1.26	0
384	2	169	65	22.7583	60	1	125	82	0	6.9	4.19	138	4.44	151	14	18	38	-2.54454	74	396	10.07	99.9378	0.81	2.15	0.95	0
385	2	170	102	35.2941	53	1	118	83	0	11.1	4.95	138	8.13	232	18	21.8	81	-2.59265	120	635.9	9.7	62.3665	1.47	1.04	0.72	0
386	1	165	60	22.0386	83	1	176	95	1	8.5	3.38	100	4	196	30.1	22.4	89	-2.14136	38	160.8	2.88	96.4542	1.6	2.57	1.15	0
387	2	178	83	26.1962	60	1	130	90	1	6.3	4.52	143	9.37	182	16	26	94	-2.80976	85	432	5.5	90.3148	2.12	2.02	0.86	0
388	2	168	80	28.3447	76	1	108	72	0	6.1	4.24	131	6.68	133	12	20	99	-3.17481	73	451	8.3	90.8444	0.61	2.12	1.02	0
389	2	180	74	22.8395	52	1	111	69	0	9.9	5	144	4.68	241	59.1	52.6	371	-2.42901	61	240.5	7.11	111.346	0.73	1.93	1.24	0
390	2	175	110	35.9184	25	1	126	83	0	11.7	5.3	150	7.19	291	120.3	76.7	142	-2.80697	92	723	5.37	102.106	7.59	2.46	0.69	1
391	1	150	60	26.6667	50	1	131	85	0	6.5	4.83	138	6.55	339	17.1	16.9	96	-2.62873	41	212	4.83	116.279	1.22	2.35	1.26	0
392	2	172	95	32.112	39	1	139	102	1	6.2	4.83	141	5.16	317	33.9	15.9	52	-2.85536	92	349	4.15	93.5917	2.67	2.84	0.9	0
393	1	160	82	32.0312	71	1	155	82	1	8.5	4.51	132	6.3	237	49	39	164	-3.31914	42	434	5.57	101.451	1.94	2.72	1	0
394	1	164	67	24.9108	60	1	133	91	1	7.5	3.8	114	6.61	258	10.8	16.5	86	-2.4246	51	283	3.8	103.669	0.7	2.33	1.21	1
395	1	162	67	25.5296	59	1	129	72	0	9.7	4.11	117	4.05	173	20.6	24.5	78	-2.72476	49	180.9	5.59	105.326	1.72	3.23	1.07	0
396	2	173	69	23.0546	63	1	115	82	0	7.7	4.76	143	4.12	88	14	15	86	-3.0995	69	347	6.4	100.185	0.97	1.24	0.67	0
397	2	165	70	25.7117	56	1	108	78	0	7.2	4.15	140	5.53	201	33.8	18.5	83	-2.47867	77	279.2	4.98	101.233	2.34	1.41	0.71	1
398	2	175	91	29.7143	57	1	128	86	0	6.4	4.21	122	7.04	177	9	11	85	-2.80952	50	183	4.91	114.618	0.53	1.19	0.76	0
399	1	160	75	29.2969	58	1	133	85	0	6.6	3.99	119	5.23	240	8	10	120	-3.5007	43	186	4.1	109.373	1.23	1.63	0.84	0
400	2	167	78	27.968	62	1	120	77	0	6.5	4.76	148	6.17	222	14.4	18.2	55	-2.25109	64	293	4.72	103.126	3.82	2.3	1	0
401	2	173	70	23.3887	58	1	181	102	1	11.7	4.72	146	6.84	212	18	20	48	-2.82874	53	272	7.06	111.92	1.97	3.6	0.82	1
402	1	158	62	24.8358	69	1	107	69	0	7.5	3.77	116	5.73	214	11.8	17.5	63	-2.27199	57	234.1	7.64	95.4327	0.71	2.81	1.67	1
403	2	166	75	27.2173	80	1	146	67	1	8.2	3.74	117	5.72	118	20	20.6	54	-2.8552	70	253	7.72	89.7425	1.09	1.63	0.73	0
404	1	160	58	22.6562	64	1	122	75	0	7.1	4.12	134	5.23	252	13.1	20.1	92	-3.24048	56	210.1	3.59	98.8678	1.52	3.17	2.24	0
405	2	169	74	25.9095	65	0	140	84	1	9.9	4.91	143	4.36	169	15.9	22.1	82	-2.55674	63	319.6	4.03	101.703	1.52	2.53	0.93	0
406	2	172	60	20.2812	85	1	131	80	0	7.8	4.16	128	5.3	189	10	12	92	-2.74894	85	310	7.8	77.3097	2.16	2.05	0.67	0
407	1	155	52	21.6441	70	1	120	79	0	8.9	4.72	142	8.5	198	80	54	83	-3.51961	56	269	6.3	95.2464	2.08	3.26	0.9	0
408	1	158	60	24.0346	70	1	127	69	0	7.5	3.83	125	6.31	223	18	22	61	-3.75048	62	327	8.9	92.766	2.3	2.17	1.11	0
409	2	170	60	20.7612	58	1	110	66	0	9.1	4.4	131	6.83	123	21	18	53	-3.27703	41	224	6.2	120.943	0.88	1.19	0.79	0
410	2	180	106	32.716	35	1	162	113	1	8.1	5.44	157	6.7	247	65.4	37.8	148	-2.72672	76	492.3	4.18	115.813	2.05	3.82	1.13	0
411	1	158	62	24.8358	54	1	101	78	0	10.2	4.52	140	3.45	230	30.7	36.3	100	-3.0583	63	505.6	3.48	100.523	1.29	3.16	1.45	0
412	2	168	73	25.8645	56	2	147	82	1	6.5	6.06	174	7.01	224	18	16	113	-3.38508	77	317	9.2	101.233	1.21	1.86	0.77	0
413	2	163	65	24.4646	81	1	103	61	0	9.3	5.09	159	8.24	197	21	29	84	-3.07146	107	397	8.5	60.1284	1.25	1.84	1	0
414	2	167	85	30.478	70	1	123	90	1	8.1	4.61	135	6.63	187	29	21	69	-2.34753	73	252	7.1	94.2984	0.83	2.6	1.07	0
415	2	155	51	21.2279	55	1	136	82	0	7.8	4.4	134	5.7	233	53	33	95	-3.33288	68	204	7.5	105.761	0.86	3.67	1.17	0
416	2	170	85	29.4118	88	1	159	74	1	7.7	4.21	126	7.26	211	16	21	62	-2.71666	130	331	18.8	45.5723	1.3	3.87	1.38	0
417	1	145	56	26.635	62	1	116	86	0	11	4.33	129	5.2	157	14	16	162	-2.63618	40	237	5.93	108.561	2.61	2.7	0.75	0
418	2	168	77	27.2817	52	1	195	131	1	10.4	5.85	175	8.63	168	44	37	117	-3.57118	78	382	7.6	103.379	3.14	2.33	0.9	0
419	2	183	130	38.8187	35	1	147	89	1	9.6	5.24	149	5.92	167	87	67	55	-2.69868	56	417	4.46	127.002	1.69	3.76	0.67	0
420	2	165	70	25.7117	74	1	93	67	0	7.8	4.15	130	5.09	211	10	8	80	-2.018	45	252	6.98	106.452	2.05	3.14	1.91	0
421	2	171	68	23.255	58	1	155	93	1	7.5	3.79	120	3.81	202	12	21	89	-1.89574	104	283	4.8	71.7833	1.54	2.6	0.92	0
422	1	155	68	28.3039	74	1	164	96	1	8.1	4.15	134	6.09	198	14	17	168	-3.36054	51	236	5.2	95.024	2.54	3.14	1.2	0
423	2	160	69	26.9531	73	1	142	91	1	6.3	4.44	128	6.83	173	33.7	30.6	116	-2.46324	67	342.9	6.59	94.9839	0.88	1.74	0.98	0
424	2	162	53	20.1951	86	2	132	85	0	8.9	3.99	129	7.53	96	19.1	22.3	83	-1.79958	114	382.9	10.54	54.0194	0.54	1.09	1.08	0
425	2	174	84	27.7447	50	1	133	91	1	8.3	5.07	154	8.25	242	35	14	168	-3.3567	77	223	5.7	105.082	0.95	1.66	0.75	0
426	2	178	88	27.7743	55	1	150	95	1	8.9	4.43	141	5.84	166	37	24	48	-2.71638	48	421	5.71	117.492	3	2.63	0.86	0
427	2	170	70	24.2215	71	1	134	77	0	7.8	4.22	139	6.5	305	17	15	67	-2.62214	51	251	5.06	104.434	1.36	2.44	0.68	0
428	2	170	65	22.4913	63	1	144	77	1	8.1	4.07	131	4.99	122	21	20	115	-3.04922	92	252	5.97	80.6145	1.93	2.92	1.12	0
429	2	167	55	19.721	68	1	109	61	0	9.8	4.84	140	4.88	157	21	28.5	146	-2.47282	65	480	4.58	98.8849	1.52	3.36	0.7	0
430	2	160	60	23.4375	77	1	132	91	1	6.5	3.92	116	4.24	159	15	22	120	-2.45452	121	320	8.3	53.1866	1.21	3.18	1.18	0
431	1	160	63	24.6094	59	1	142	108	1	9.5	4.25	130	5.76	189	27	21	72	-2.87474	62	288	6.63	99.3344	3.36	1.59	0.85	0
432	2	175	83.5	27.2653	56	1	111	77	0	7.8	4.39	136	5.84	119	32	18	52	-2.9859	67	383	10.29	105.576	2.49	2.48	0.62	0
433	2	160	52	20.3125	49	1	106	75	0	10.6	4.15	128	5.59	257	14	14	60	-2.62253	58	305	6.52	115.184	0.65	2.66	1.54	0
434	2	175	71	23.1837	65	1	135	85	0	7.8	4.12	140	4.4	126	52	28	78	-2.58336	71	322	7.2	98.0963	0.97	2.87	1.54	0
435	2	175	69	22.5306	36	1	126	63	0	6.2	4.71	144	5.19	196	20.1	20	64	-2.81294	71	383.8	5.01	117.485	1.47	4.2	1.1	1
436	2	174	78	25.763	47	1	133	97	1	7.2	4.82	156	7.36	138	82.4	33.2	68	-2.97909	76	441.8	4.11	107.484	4.92	2.35	0.67	0
437	1	148	59	26.9357	87	1	116	73	0	7.5	3.35	107	5.49	217	38.2	39.9	56	-2.3928	80	536.9	10.91	61.4658	1.04	1.59	1.08	0
438	2	170	85.5	29.5848	75	1	173	71	1	9.1	4.01	122	11.74	260	90	56	107	-2.91897	111	415	8.8	59.7254	2.42	4.58	1.08	0
439	1	165	61	22.4059	45	1	87	65	0	6.2	4.17	132	4.9	186	15.7	15.5	56	-2.61292	44	296.3	4.25	117.927	5.61	1.54	0.58	0
440	1	159	56	22.151	75	1	113	67	0	7.5	3.53	102	7.2	129	18	17	70	-2.96848	82	375	8.89	64.295	2.23	0.95	0.6	0
441	2	182	85	25.6612	46	1	108	75	0	7	4.48	142	4.83	259	16	14	52	-3.15294	58	255	6.36	117.354	7.38	1.54	0.35	0
442	1	152	70	30.2978	63	1	121	70	0	6.3	3.78	113	5	199	18	17	84	-3.13422	58	235	6.6	98.6468	1.75	2.53	0.9	0
443	1	154	56	23.6128	70	1	150	75	1	8.2	3.64	114	3.78	150	14.7	17	58	-2.5284	67	269.7	8.49	84.5218	0.73	3.64	1.44	0
444	1	168	67	23.7387	53	1	103	74	0	10.4	4.1	122	5.14	130	44.1	26.6	88	-2.55418	52	297	5.8	107.776	1.23	2.35	1.05	0
445	2	165	70	25.7117	32	1	139	89	0	10.3	5.52	155	4.94	178	13	14	130	-2.94082	58	379	4.84	128.03	1.21	2.89	0.74	0
446	2	178	88	27.7743	74	1	160	88	1	8.8	4.68	144	4.82	149	12	16.2	86	-2.97064	50	229	4.4	103.118	0.99	2.14	1.1	1
447	2	174	78	25.763	60	1	128	84	0	8	5.03	154	7.89	197	15.8	17.5	59	-2.8702	65	266.2	6.1	103.929	1.56	2.53	1.09	0
448	2	168	79	27.9904	49	1	118	80	0	6.5	4.53	144	6.63	154	21	17	55	-2.60772	71	361	5.11	108.36	2.32	1.45	0.78	0
449	2	172	69	23.3234	55	1	110	74	0	8.6	5.26	161	8.41	135	27.5	22.9	80	-3.07622	112	308.7	8.73	66.9122	3.55	2.81	0.85	0
450	2	168	82	29.0533	56	1	135	97	1	7.6	5.46	157	10.34	221	16	16	107	-3.3011	91	460	4.5	85.3132	2.83	4.42	1	0
451	2	158	56	22.4323	69	1	152	80	1	6.7	4.28	127	12.02	191	8	20	75	-3.19378	72	275	5.8	95.2827	0.6	1.48	1.09	0
452	2	160	53	20.7031	66	1	98	52	0	6	3.8	114	5.98	158	16	26	103	-3.11084	60	212	6.2	102.572	0.88	0.99	1.06	0
453	2	172	71	23.9995	72	1	140	75	1	6.5	4.45	133	2.94	90	21	24	101	-2.94138	86	465	6.81	82.6516	1.47	2.41	0.92	0
454	2	175	72.5	23.6735	70	1	144	83	1	7.9	4.47	140	5.74	218	18	18	124	-3.35742	67	298	6.6	96.7727	1.45	2.14	1.16	0
455	2	170	70	24.2215	76	1	115	70	0	6.3	4.07	126	6.74	175	39	21	72	-3.04199	106	554	10.58	62.7305	1.88	4.74	1.27	0
456	2	172	74	25.0135	43	1	112	78	0	9.3	5.41	171	6.03	149	24.2	21.9	63	-2.8373	67	303.5	6.08	114.467	1.66	2.14	0.75	0
457	1	153	81.5	34.8157	69	1	193	81	1	8.6	3.59	109	4.45	149	12.2	18.1	77	-1.96826	48	210.2	5	99.4681	1.46	3.06	1.09	0
458	2	174	70	23.1206	67	1	126	75	0	7.4	3.89	126	4.66	108	11	16	64	-2.34358	67	225	4.29	98.5953	1.24	3.01	0.8	0
459	2	170	74	25.6055	78	1	150	90	1	7.5	4.26	137	6.89	153	21	22	53	-2.64126	81	531	8.65	85.5582	2.72	0.88	0.33	1
460	2	160	55	21.4844	78	1	122	70	0	8.3	4.55	123	5.83	206	28	25	134	-3.29323	108	411	11.4	60.5808	1.23	1.6	0.88	0
461	2	165	65	23.8751	56	1	142	97	1	6.1	4.22	132	5.01	177	25	22	62	-2.76979	60	271	6.38	109.154	1.8	2.35	0.76	0
462	2	172	86	29.0698	32	1	123	80	0	10.1	5.36	155	6.29	140	25.6	18.1	81	-2.71599	59	293.4	5.63	127.37	3.58	1.9	0.71	1
463	2	174	80	26.4236	65	1	132	78	0	6.3	4.88	154	5.72	185	20	19	67	-2.89767	97	305	7.7	74.7189	1.09	1.3	0.95	0
464	1	153	70	29.903	73	1	140	79	1	9.3	3.32	101	6.8	316	5	18	67	-2.21453	57	326	2.9	93.0879	1.24	1.04	0.6	0
465	2	181	72.5	22.13	48	1	145	96	1	9.5	5.26	153	5.15	214	29	18	107	-2.84608	76	349	6.6	106.818	4.4	3.33	0.97	0
466	1	148	54	24.653	72	1	139	89	0	8.4	4.64	137	6.39	258	3.6	14	140	-2.55198	44	151	5.93	99.6983	1.89	2.74	1.1	0
467	2	177	80	25.5354	62	1	129	76	0	5.7	4.26	131	6.73	221	26.1	22.1	81	-2.57436	58	289.3	5.38	106.238	1.33	1.87	0.97	0
468	2	172	70	23.6614	58	1	165	105	1	6.8	4.95	146	3.83	118	17	21	63	-2.90326	79	321	7.08	99.2102	1.11	3.34	1.24	0
469	2	170	55	19.0311	86	1	121	60	0	9.7	4.85	154	8.97	146	11	12	76	-2.91978	58	217	5.8	91.5074	0.9	2.16	1.16	0
470	2	155	59	24.5578	59	1	136	80	0	8.8	4.85	138	7.26	98	22	33	105	-2.80238	64	437	5.68	105.068	1.43	2.5	0.61	0
471	2	180	76	23.4568	68	1	109	66	0	4.9	5.53	157	4.14	142	13.1	18.7	44	-2.63404	63	311	8.03	99.8226	1.14	2.04	0.9	0
472	1	162	51.5	19.6235	64	1	138	83	0	6.5	3.59	111	3.96	153	6.8	18.7	89	-2.62642	56	250.6	6.59	98.8678	1.55	2.61	1.36	0
473	2	170	71.5	24.7405	75	1	158	85	1	7.3	4.07	116	5.55	123	34.5	17.5	69	-2.38898	100	349.8	8.71	67.6934	1.17	1.56	1.12	0
474	2	162	80	30.4832	56	1	122	79	0	9.7	4.26	147	5.99	228	57.7	40	41	-2.82994	65	425.3	4.94	106.547	5.18	4.08	1.15	0
475	2	175	92	30.0408	46	1	194	110	1	7.7	4.78	143	7.22	271	22	12	123	-3.25916	78	405	8.9	107.31	3.91	2.62	0.91	0
476	2	168	75	26.5731	39	1	124	88	0	5.8	5.66	157	5.67	176	15.1	17.2	65	-3.2491	78	411.6	6.32	112.085	1.51	3.98	1.21	1
477	2	172	84	28.3937	56	1	140	89	1	6.9	5.55	165	5.71	167	14	20	67	-2.90962	64	431	3.2	107.047	1.17	2	1.2	0
478	1	153	62	26.4855	51	1	146	69	1	14.6	4.5	128	5.06	203	15.2	15.2	71	-2.26407	50	165.3	3.61	110.161	1.83	3.36	1.24	0
479	1	152	41	17.7458	57	1	110	72	0	6.7	3.91	115	4.72	220	24.9	29.3	78	-2.38374	53	272.8	4	104.646	1.71	2.3	1.17	0
480	2	162	66	25.1486	69	1	153	82	1	7.7	4.41	130	7.75	235	26	19	56	-3.25812	98	503	6.9	71.9915	1.83	2.3	0.69	0
481	2	172	74	25.0135	63	1	142	92	1	6.8	4.97	145	9.46	245	14	21	68	-3.18441	107	482	7.83	67.2509	1.86	1.13	0.72	1
482	1	154	68	28.6726	86	1	122	76	0	10.9	3.41	105	6.74	100	12	19.6	62	-2.74574	96	479	11.45	49.6955	8.26	1.51	0.81	0
483	1	156	58	23.833	55	1	121	79	0	6.1	4.47	136	7.22	258	66	44	137	-2.8373	43	371.3	6.3	111.432	2.09	3.72	1.25	0
484	2	169	68	23.8087	67	1	166	92	1	7.5	4.76	146	7.12	220	13	12	80	-3.03585	61	241	7.2	101.429	0.94	2.09	0.92	0
485	1	155	53	22.0604	71	1	120	75	0	6.8	3.98	128	5.88	194	14.2	19.8	98	-2.88732	58	281.3	4.84	93.8588	0.92	2.7	1.24	0
486	1	162	85	32.3884	65	1	125	78	0	6.1	3.99	120	4.37	152	13	18	70	-2.65618	41	284	6.28	105.922	1.36	1.44	1.15	0
487	2	170	63.5	21.9723	80	1	129	73	0	7.4	4.59	136	5.65	217	18	16	34	-3.67438	59	244	6.9	94.4975	1.1	2.02	0.72	0
488	1	163	80	30.1103	84	1	145	76	1	7.1	3.78	98	6.31	140	11	13	69	-3.00758	64	357	9	81.8519	0.81	1.49	1.04	0
489	2	172	78	26.3656	50	1	122	90	1	8.3	5	150	5.28	195	43.9	27.8	83	-2.61543	84	399.8	5.4	97.4847	5.64	2.56	0.88	0
490	2	160	43	16.7969	78	1	136	66	0	7.1	4.02	127	4.56	194	44.4	34	57	-2.37802	51	245.4	5.24	99.9847	0.42	2.13	1.83	1
491	2	160	60	23.4375	60	1	119	74	0	8.1	4.22	134	4.84	169	46	26	93	-2.32497	55	435	5.95	109.307	1.6	1.81	0.82	1
492	2	172	68	22.9854	45	1	130	78	0	9.3	4.56	131	5.16	162	20.3	21.4	58	-2.81208	74	258.3	5.29	109.71	0.68	2.68	1.18	1
493	2	170	62	21.4533	79	1	135	82	0	7.6	3.77	116	5.2	276	13	12	61	-2.40964	69	290.5	4.82	90.6956	0.82	2.2	1.16	0
494	2	173	64	21.3839	48	2	113	74	0	6.2	4.23	129	9.57	344	14.6	17.7	74	-2.451	63	557.2	7.31	113.044	2.6	2.89	0.92	0
495	2	170	61.5	21.2803	62	1	136	80	0	12.7	4.26	129	7.1	233	12	14	56	-2.13894	49	249	5.28	111.788	1.07	2.54	0.87	0
496	2	167	59	21.1553	55	1	137	95	1	11.2	5.16	154	4.63	167	21	18	91	-2.47826	64	252	7.59	107.715	1.33	2.55	0.67	0
497	1	152	67	28.9993	76	1	117	83	0	8.6	3.95	125	5.3	188	21	26	86	-2.82313	95	308	7.35	53.5531	1.12	2.11	0.98	0
498	1	146	52	24.3948	67	1	122	71	0	9.8	4.15	131	5.1	165	14	16	99	-3.12642	40	264	6.3	105.237	5.77	3.8	1.1	0
499	2	169	65.5	22.9334	49	1	112	71	0	6.3	4.6	140	5.78	208	12	16	95	-3.27941	58	322	5.2	115.184	1	2.52	1.57	0
500	2	166	72.5	26.3101	63	1	124	71	0	6.7	4.65	135	8.69	197	15	12	65	-2.51638	93	435	6.14	79.5754	1.33	1.81	0.64	1
501	2	166	62	22.4996	84	1	107	68	0	6.5	3.18	106	4.37	152	19	24	60	-3.1124	62	243	8.1	90.8053	0.99	1.59	1.14	0
502	2	176	80	25.8264	54	1	120	92	1	9.7	5.36	141	7.65	195	19	16	91	-2.62966	80	292.1	6.4	100.823	1.15	2.03	0.79	0
503	2	169	73	25.5593	44	1	114	86	0	9.7	4.78	145	6.67	178	40.3	26.8	100	-2.63602	70	334.9	5.3	112.262	5.66	2.33	0.89	0
504	1	155	57	23.7253	64	1	136	94	1	9.9	3.77	112	4.8	190	50	57	121	-3.02498	28	162	2.8	116.843	2.19	1.75	0.92	0
505	2	180	80	24.6914	56	1	170	102	1	7.9	4.44	132	5.35	145	21	22	80	-2.60298	88	379	8.18	88.815	8.61	2.01	0.29	0
506	1	160	60	23.4375	72	1	98	50	0	6	4	123	24.3	204	44	104	77	-2.05264	121	409	8.6	41.069	0.95	2.29	1.6	0
507	1	152	70	30.2978	75	1	133	85	0	9.1	3.96	124	10.79	319	18	23	69	-2.40646	52	281	7.61	93.994	1.37	3.08	0.66	0
508	2	176	75	24.2123	47	1	137	91	1	9.4	4.98	155	8.38	256	16.1	15.4	80	-2.44442	88	435.5	8.15	93.9281	15.28	2.78	0.68	1
509	1	160	65	25.3906	76	1	156	91	1	8.8	4.26	132	8.06	244	23.3	22.8	107	-2.7158	47	265	3.52	95.7151	2.14	3.64	1.37	0
510	2	175	66	21.551	73	1	125	66	0	8.6	4.11	118	5.63	173	11.2	13.2	67	-2.19159	69	264	6.59	94.1439	1.22	1.52	0.72	0
511	1	164	62	23.0518	58	1	123	76	0	6.6	3.93	124	9.12	179	16	14	51	-2.82002	47	264	6.28	107.053	0.99	2.99	1.96	0
512	1	152	65	28.1337	66	1	147	78	1	9.9	3.59	102	6.82	243	14.3	14.7	49	-2.63052	62	293.5	7.41	95.1027	1.27	0.92	0.73	0
513	2	174	90	29.7265	77	1	142	84	1	6.5	4.32	127	7.44	210	67	34	73	-2.94423	166	363	9.7	36.3927	1.38	1.59	0.7	0
514	2	168	75	26.5731	55	1	132	80	0	9.2	4.79	144	5.12	158	17.2	15.6	66	-2.71348	52	351.7	4.01	114.686	2.83	2.91	0.81	0
515	2	165	67	24.6097	84	1	151	64	1	8	3.9	117	8.78	219	13	15	86	-3.28132	61	196	6.2	91.2523	2.3	2.19	1.03	0
516	2	168	75	26.5731	45	1	134	90	1	10.2	4.92	150	6.77	228	30.8	26.3	91	-2.85938	64	423.1	5.41	114.627	1.28	2.86	0.9	0
517	2	173	85	28.4005	47	1	153	109	1	9.4	4.74	156	7.46	224	13	14	77	-2.80138	70	273	5.2	110.187	6.06	2.27	0.97	1
518	2	171	78	26.6749	51	1	165	108	1	9.1	5.15	157	5.52	260	29.7	21.2	78	-2.37132	87	372.9	6.27	92.8854	3.8	2.21	0.88	0
519	2	164	70	26.0262	39	0	92	70	0	10.7	5.4	160	7.33	191	14	15	107	-2.29398	62	379	5.9	120.131	2.11	3.36	1.19	0
520	2	165	55	20.202	37	1	109	69	0	13.3	4.5	140	7.39	105	14.9	15.4	68	-2.21303	70	304.8	5.34	117.258	5.68	4.51	1.06	0
521	2	176	75	24.2123	52	1	142	96	1	9.9	4.68	139	4.79	209	16.6	18.5	77	-2.57344	56	348.3	6.2	114.26	1.99	3.15	0.92	0
522	2	176	96	30.9917	56	1	96	77	0	6.2	5.12	144	4.7	105	18	26	55	-2.30317	165	587	16.6	41.772	0.95	1.38	0.89	0
523	2	172	72	24.3375	52	1	162	100	1	7.2	4.62	137	4.86	281	21.4	15.1	51	-2.50216	60	259.6	7.21	111.904	0.94	2.25	0.82	0
524	2	169	83	29.0606	55	1	165	94	1	8	4.55	135	9.71	300	20.9	18.1	107	-2.65215	75	458.8	7.16	102.677	1.67	3.25	0.78	0
525	2	171	92.5	31.6337	54	1	157	96	1	6.1	4.56	142	7.17	147	23	19	65	-2.66134	56	312	4.04	112.847	1.52	2.73	0.66	0
526	2	172	72.5	24.5065	53	1	140	89	1	8.3	4.52	139	6.79	94	38	58	88	-2.44583	62	314	5.27	110.114	2.64	2.84	0.76	0
527	2	180	79	24.3827	61	1	140	85	1	8.7	5.09	147	5.55	170	32.3	27	90	-2.43839	65	302.6	7.79	103.285	1.36	2.66	1.08	0
528	1	165	74	27.1809	48	1	136	87	0	5.5	3.97	121	4.81	279	33.7	17.7	35	-2.34328	48	303.8	5.75	113.346	0.82	1.35	1.04	0
529	2	168	67	23.7387	53	1	136	92	1	11.7	4.8	148	5.67	145	16.8	25.4	88	-2.8754	46	452.3	7.25	120.501	22.09	2.61	0.71	0
530	2	175	80	26.1224	65	1	142	83	1	7.5	4.02	126	5.3	180	8	7	52	-3.04702	92	344	8.8	79.618	1.91	1.75	0.85	0
531	2	170	80	27.6817	31	1	142	105	1	9.7	5.53	151	4.76	174	101	66.7	84	-3.04278	65	455.9	6.15	124.471	9.3	3.09	0.81	0
532	2	162	60	22.8624	74	1	126	84	0	9.6	4.43	132	5.39	247	11	9	107	-2.71009	58	214	5.2	98.5981	0.83	1.76	0.75	0
533	2	175	70	22.8571	76	1	152	97	1	6.5	4.23	127	5.55	217	16.9	18.4	90	-2.46694	74	253.9	5.18	90.4719	0.76	2.28	1.21	0
534	1	153	68	29.0487	72	2	138	77	0	8.1	3.53	111	4.92	171	28.2	22.1	58	-2.33157	63	369	3.6	89.8769	3.8	2.88	0.98	0
535	1	166	65	23.5883	38	1	143	99	1	5.5	4.03	124	7.38	341	24	23.2	59	-2.86011	44	323	3.91	123.175	2.28	2.61	0.73	1
536	2	168	71	25.1559	71	1	132	70	0	9.3	4.99	160	7.21	172	23	18	69	-3.01502	115	366	7.22	58.6831	1.27	2.31	0.85	0
537	2	179	85	26.5285	52	1	142	97	1	8.3	5.31	165	7.37	250	27	21	47	-2.78506	57	317	3.87	113.651	1.27	2.31	1.06	0
538	2	165	61	22.4059	68	1	134	70	0	10.6	5.03	124	7.48	212	18	24	78	-2.70332	66	323	8.12	98.43	1.44	1.35	0.61	0
539	2	168	69	24.4473	70	1	131	87	0	6.6	4.59	137	7.54	200	26	25.6	84	-2.48851	73	305.4	4.02	94.2984	1.15	2.62	1.3	1
540	2	170	86	29.7578	32	1	143	103	1	7.5	5.6	167	7.44	225	58.8	30.2	70	-2.92597	63	406	6.54	124.872	2.99	2.91	0.99	0
541	1	155	53	22.0604	76	1	147	81	1	5.7	3.54	108	4	236	35	58	81	-2.7188	57	265	8.04	91.3671	0.75	4.75	1.53	0
542	2	166	70	25.4028	65	1	124	90	1	7.6	4.87	152	6.79	318	11	18	116	-3.55753	93	435	6.3	78.5918	2.61	2.9	1.08	0
543	2	170	78	26.9896	67	1	126	68	0	7.1	4.54	132	6.52	188	11.9	16.1	44	-2.53714	107	504.5	7.95	65.5985	1.79	3.2	0.99	1
544	2	171	83	28.3848	39	1	129	93	1	10	4.55	129	4.5	170	20.4	12.3	85	-2.61046	68	430.8	5.7	116.826	4.18	1.75	0.55	0
545	1	150	60	26.6667	80	1	134	77	0	8.2	3.86	113	5.87	248	10.2	14.7	143	-2.46386	83	183.3	8.04	61.4264	0.84	2.53	0.98	0
546	1	152	37	16.0145	70	1	144	50	1	10.2	3.37	110	15.81	202	28	93	52	-2.76726	142	493	13.9	34.3173	1.9	1.91	0.96	0
547	2	170	80	27.6817	66	1	118	82	0	12.9	3.31	69	5.63	335	11	10	53	-2.60722	189	440	10.5	33.3504	1.54	1.21	0.69	0
548	2	172	75	25.3515	68	1	150	101	1	8	4.47	133	7.39	243	16.4	20.3	55	-2.53666	52	240.9	3.78	105.778	1.07	2	1.22	0
549	1	165	72	26.4463	83	1	135	84	0	7.7	3.81	115	5.85	181	13	20	140	-2.72911	81	348.9	8.09	62.0817	2.1	3.47	1.54	0
550	2	170	68	23.5294	55	1	119	83	0	10.4	5.09	160	7.03	140	12.6	21.9	71	-2.41809	76	262	6.63	102.267	1.25	3.84	1.2	0
551	2	173	76	25.3934	51	1	152	92	1	9.9	4.36	126	8.11	279	15.9	16.7	80	-2.92742	71	514.9	7.87	107.02	6.74	3.67	1.06	1
552	1	155	72	29.9688	67	1	96	65	0	7.5	4.51	127	7.45	203	22	27	128	-2.63102	106	457	15.6	49.6586	1.03	1.24	0.96	0
553	2	168	77	27.2817	54	1	131	96	1	8.5	4.57	133	7.59	155	25	22	74	-2.81434	84	463	5.98	95.0895	1.5	3.52	0.94	0
554	1	162	65	24.7676	56	1	127	68	0	6.4	4.19	119	7.07	175	9	12	93	-3.39196	52	282	8.7	105.784	1.48	2.13	1.01	0
555	2	180	90	27.7778	64	1			0	10.4	5.1	135	3.97	283	15.9	15	64	-2.5982	64	227.9	4.9	101.851	1.12	2.78	1.1	0
556	1	163	71	26.7229	54	1	159	97	1	10.3	3.84	112	9.39	135	19	15	138	-2.23016	54	439	7.05	106.138	4.36	2.16	0.73	1
557	2	168	110	38.9739	55	0	140	86	1	7.3	4.55	137	6.38	227	21	19	66	-2.86496	69	333	5.7	105.296	2.58	3.31	0.86	0
558	2	174	70	23.1206	56	0	125	83	0	6.7	4.53	132	6.79	185	13	14	76	-2.06671	45	298	7.22	119.062	0.7	0.93	0.61	0
559	1	159	60	23.7332	69	1	142	69	1	8	3.76	113	6.29	199	14	12	117	-2.90842	53	94	8.8	97.1208	1.29	1.92	1.22	0
560	1	158	55	22.0317	67	2	116	68	0	9	3.76	108	6.52	365	6	17	120	-2.72905	98	525	4.7	54.562	2.09	1.59	0.85	0
561	2	163	60	22.5827	71	1	150	95	1	7.5	4.06	126	9.37	139	15	37	76	-3.36688	71	311	6.8	94.5032	1.16	2.3	0.85	0
562	1	162	60	22.8624	69	1	153	82	1	6.5	3.01	98	8.41	295	9.7	14	71	-2.32098	52	245	5.97	97.5677	1.78	1.93	0.84	0
563	1	165	60	22.0386	54	1	138	77	0	5.6	4.36	122	6.58	220	23	19	69	-3.08176	46	251	6	110.32	1.34	3.03	0.99	0
564	2	181	67	20.4511	67	1	134	79	0	7.6	5.58	160	4.57	193	15.4	14.7	94	-2.58707	67	259.5	7.64	98.5953	1.06	1.88	1.09	0
565	1	162	61.5	23.4339	70	1	99	78	0	7.2	3.59	118	7.53	196	17	17	81	-2.64082	53	291	6.2	96.5187	1.49	2.57	1.11	0
566	2	176	65	20.984	60	1	126	76	0	6.2	3.33	102	6.33	273	22	17	171	-2.8166	52	192	5.3	111.174	1.23	2.7	0.69	0
567	1	152	60	25.9695	58	1	130	92	1	9.6	4.4	134	5.05	223	8.2	16.8	91	-2.57874	47	166.2	3.99	107.053	1.51	4.17	1.41	0
568	2	178	78	24.6181	54	1	122	84	0	10.6	4.63	145	4.45	105	30.5	27.3	85	-2.27172	66	467.2	3.95	107.384	1.58	1.83	1.01	0
569	2	168	85	30.1162	56	1	138	84	0	8.7	4.61	134	5.32	225	39.8	19.9	66	-2.8999	60	304.3	5.04	109.154	2.31	3.14	1.24	0
570	2	177	79	25.2163	58	1	148	79	1	8.2	5.23	144	7.83	281	17.9	17	76	-2.7564	77	410.6	7.24	99.9815	0.84	1.96	0.78	0
571	2	172	67	22.6474	49	2	148	91	1	5.8	4.15	130	6.36	250	13.6	18.3	59	-2.4595	61	416.2	6.26	113.443	2.93	4.02	1.33	1
572	2	173	82	27.3982	58	1	126	91	1	10.2	4.78	148	8.05	321	47.2	22.3	40	-2.51362	93	325.2	6.54	82.0888	10.8	2.04	0.7	0
573	2	170	71	24.5675	53	1	93	61	0	6.8	4.77	153	9.63	186	21	14	73	-2.86661	91	408	5.6	86.9199	2.36	1.76	0.95	0
574	1	156	50	20.5457	66	1	118	70	0	7.9	4.29	130	11.07	236	28.4	55.4	118	-3.10276	67	208	7.1	86.6509	1.93	2.86	1.25	0
575	1	168	82	29.0533	61	1	132	76	0	8	4.46	121	9.46	239	7	14	103	-2.55696	45	368	5.57	106.181	1.3	0.9	0.59	0
576	2	181	85	25.9455	34	0	120	79	0	6	4.96	148	10.09	207	17	14	68	-3.07541	54	293	7.06	129.205	3.11	2.05	0.52	0
577	2	169	84	29.4107	42	1	106	95	1	12	5.3	155	13.14	191	9	16.3	90	-2.32502	93	661.5	8.85	90.6776	17.87	3.26	0.57	1
578	1	155	71	29.5525	52	1	137	83	0	7.9	4.92	149	5.05	241	20.2	16.8	68	-2.47524	47	298.7	5.8	111.123	1.67	3.14	1.08	0
579	2	162	68	25.9107	74	1	139	73	0	7.4	4.18	126	4.65	197	18	19	59	-2.51904	89	331	5.92	78.3393	0.88	1.02	0.58	0
580	1	150	60	26.6667	63	1	118	69	0	9.1	3.47	98	5.18	181	20	21	58	-2.5113	42	382	4.98	106.627	0.94	0.95	0.51	0
581	1	155	62	25.8065	63	1	113	72	0	6.9	4.4	123	4.9	243	15	19	86	-2.9302	46	317	6.18	104.314	0.87	2.15	1.08	0
582	2	170	74	25.6055	63	1	126	80	0	6.5	4.37	130	12.57	252	21	16	77	-3.09574	52	267	6.1	109.119	0.54	2.04	0.81	0
583	1	168	57.5	20.3727	62	1	152	86	1	7.6	4.48	135	3.77	241	10	19.4	52	-2.24222	50	228.6	8.35	102.877	0.58	2.53	1.88	0
584	1	159	52	20.5688	61	1	134	73	0	8.3	4.37	131	4.32	203	23	26	53	-2.49352	39	261	4.03	109.907	1.43	2.98	1.58	0
585	2	170	66	22.8374	67	1	135	85	0	6.4	3.02	89	4.12	172	17	33	55	-1.1395	72	245	7.8	96.4753	1.87	7.03	1.88	0
586	2	166	67	24.3141	64	1	123	76	0	5.7	4.48	141	5.31	164	13	17	48	-2.97209	77	291	4.78	96.3193	1.49	3.68	0.83	1
587	2	173	74	24.7252	48	1	114	78	0	8.9	4.68	154	6.55	145	14	12	70	-2.63354	61	262	4.74	114.151	1.11	1.79	0.69	0
588	2	168	69	24.4473	76	1	116	85	0	10.8	4.66	140	6.67	211	17	21	53	-2.785	76	330	5.55	89.7462	1.62	2.17	0.93	1
589	2	165	73	26.8136	71	1	157	84	1	9.4	3.44	108	8.73	259	15.4	16.5	107	-1.69854	77	304.6	4.6	92.216	1.27	2.28	0.75	0
590	2	175	68	22.2041	56	1	150	93	1	13.8	4.7	136	5.34	195	16.9	16.8	76	-1.92338	128	306	7.8	56.6518	2.1	6.42	1.95	0
591	1	168	64	22.6757	80	1	155	81	1	7.4	3.59	107	6.52	181	19	15	71	-2.74348	70	360	7	75.3583	2.79	3.91	1.19	0
592	2	170	77	26.6436	52	1	137	71	0	7.2	4.13	134	8.04	262	12	14	80	-3.40821	65	347	7.95	109.231	1.34	3.3	0.79	0
593	1	160	55	21.4844	76	1	141	75	1	6.6	4.6	129	6.54	114	14	20	58	-3.11396	62	367	9.26	89.3681	3.19	2.21	0.77	1
594	2	172	74	25.0135	62	1	166	92	1	9.7	4.05	125	5.48	205	18	18	84	-2.46542	80	347	7.56	95.9294	1.08	2.24	1.11	0
595	1	161	65	25.0762	49	1	130	80	0	8.7	4.24	119	5.06	255	11.8	15.9	59	-2.4419	50	149.1	3.7	111.54	1.29	2.22	0.94	0
596	1	156	60	24.6548	50	1	98	67	0	6.1	3.25	99	5.03	99	15	14	62	-2.91853	50	292	5.72	110.849	1.13	1.05	0.47	0
597	1	144	43	20.7369	55	1	132	90	1	12.2	4.1	126	5.09	196	11	13	72	-2.73949	54	204	5.17	105.48	1.64	3.2	0.76	0
598	2	170	78	26.9896	84	1	139	72	0	9	5.08	163	8.52	201	16	21	104	-2.8718	80	422	8.5	83.6622	1.08	4.1	1.14	0
599	1	150	54.5	24.2222	66	1	124	86	0	6.8	4.15	122	5.84	262	15	17	123	-3.17394	45	337	5.1	102.93	3.91	3.07	1.3	0
600	2	181	90	27.4717	51	1	139	78	0	8.2	5.11	160	5.36	210	14	18.4	93	-2.68054	77	435.9	5.3	104.43	1.11	1.18	0.95	0
601	1	160	58	22.6562	66	1	178	77	1	7.3	2.91	88	4.09	93	18	21	81	-2.85266	46	218	3.6	102.386	1.58	1.8	1.17	0
602	1	156	61	25.0657	63	1	114	82	0	9.6	3.84	102	6.99	342	100	29	131	-2.33551	51	187	6.19	101.752	1.64	2.27	1.05	0
603	2	169	79	27.6601	42	1	124	87	0	11.2	5.44	164	7.71	287	27	16	79	-3.18788	54	309	6.18	122.934	5.74	2.37	0.49	0
604	1	156	43	17.6693	83	1	167	69	1	8.9	3.33	97	6.66	242	21	34	157	-3.08788	68	399	7.8	76.5834	1.41	1.71	1	0
605	1	155	45.5	18.9386	77	1	138	69	0	6.4	4.09	118	6.42	181	9	14	54	-2.91874	53	225	9.8	92.4069	0.79	2.21	1.76	0
606	2	173	80	26.7299	61	1	155	90	1	9.1	5.4	155	4.97	178	18.1	15.1	88	-2.8225	61	256.3	6.49	105.285	1.05	1.78	1.1	0
607	2	168	99	35.0765	68	1	165	82	1	8.2	4.77	146	6.21	209	17	16	76	-2.87098	75	328	6.7	94.7024	1.7	2.78	0.77	0
608	2	167	50	17.9282	83	1	108	63	0	6.6	3.45	103	17.45	133	17	45	74	-1.8393	80	308	7.3	84.1842	0.7	1.7	0.74	0
609	2	160	60	23.4375	57	1	151	90	1	10.8	5.12	144	7.16	203	19.8	12.8	137	-2.6937	64	274.3	4.72	106.384	8.69	2.84	0.88	0
610	2	172	75	25.3515	52	1	119	82	0	7.7	4.73	143	4.55	148	17.1	12.8	69	-2.47544	79	434.9	6.81	102.982	2.96	1.93	1.01	0
611	1	162	57	21.7193	49	1	105	75	0	8.5	3.59	110	24.77	224	29.9	34	98.5	-1.75349	58.7	129.3	6.67	107.31	2.76	2.81	0.88	0
612	2	168	67	23.7387	74	1	115	69	0	5.9	2.99	108	5.5	237	13.5	17.8	70	-3.19642	74	372.2	8.7	91.6043	1.43	1.51	0.97	0
613	2	166	85	30.8463	68	1	122	74	0	6.7	3.74	118	4.76	168	52	62	89	-3.35358	67	314	6	97.984	0.62	0.89	0.95	0
614	2	168	52	18.424	88	1	150	66	1	9	4.86	149	7.09	119	19.1	26	69	-2.33805	87	414.8	8.57	73.7922	0.93	1.42	1.48	0
615	2	165	72	26.4463	57	1	145	98	1	6	4.86	140	4.68	185	11	18	74	-3.3096	86	221	5	90.7333	0.74	1.51	1.19	0
616	1	160	55	21.4844	74	1	180	100	1	9.1	3.87	117	7.22	134	30	22	103	-2.61846	80	284	6.08	66.6418	0.89	1.88	1.31	0
617	2	174	71	23.4509	58	1	125	80	0	7.4	4.2	129	3.67	177	15	14	53	-3.06323	74	440	6.94	101.189	0.72	1.29	0.89	0
618	1	160	82	32.0312	54	1	134	77	0	7.7	3.92	122	6.53	162	13.6	12.8	57	-2.4671	41	204.7	4.75	113.422	0.81	1.51	0.91	0
619	2	175	75	24.4898	58	1	137	80	0	9.5	4.5	132	5.31	179	12.6	12	75	-2.58853	55	296.5	4.87	110.675	1.48	2.79	0.82	0
620	2	178	75	23.6713	72	1	102	78	0	6.9	4.75	138	15.43	112	142	1058	74	-2.4481	89	338	7.86	79.3198	2.66	1.89	0.91	0
621	2	168	71	25.1559	43	1	138	84	0	6.4	5.21	153	4.24	105	30	27	58	-3.08536	66	311	5.04	114.988	1.36	3.09	0.84	0
622	1	140	42	21.4286	71	1	148	87	1	6.3	4.06	127	5.6	155	39	32	79	-3.14086	55	268	6.3	95.0678	0.54	1.07	1.4	0
623	1	155	50	20.8117	76	2	130	59	0	6.7	2.7	88	3.9	187	16.5	25.5	66	-2.86164	91	413	12.18	56.3901	1	1.14	0.83	1
624	1	152	65	28.1337	79	1	158	78	1	6.6	3.96	125	5.43	115	27	25	57	-3.05917	68	323	6.7	78.5125	1.66	2.03	1.15	0
625	2	175	86	28.0816	32	1	116	74	0	11.8	5.33	152	7.79	239	20	15.2	68	-2.80976	70	423.1	5.36	120.961	3.23	4.72	1.3	0
626	2	167	75	26.8923	48	1	134	89	0	8.8	5.25	154	4.5	179	26	19	103	-3.01447	77	203	7.7	106.397	1.08	1.31	0.89	0
627	1	150	58	25.7778	77	1	137	77	0	7.9	3.37	109	3.61	138	27.1	29.9	89	-2.33948	48	202.8	5.11	94.6402	0.77	2.82	1.6	0
628	1	163	59	22.2063	41	1	132	87	0	12.9	5.03	140	5.51	257	9.5	11.4	78	-2.42668	47	230.9	4.11	118.991	1.41	4.29	1.37	0
629	1	155	57	23.7253	50	1	129	92	1	13.6	4.62	138	3.99	180	10.5	14.2	89	-2.1869	44	153.2	3.53	114.317	1.63	1.93	0.97	0
630	2	170	65	22.4913	74	1	106	68	0	9	3.03	92	7.38	128	25	21	69	-2.13561	56	378	6.35	99.6485	2.46	1.76	0.86	0
631	1	153	60	25.6312	65	1	152	84	1	6.8	4.05	120	5.12	186	41	25	99	-2.96966	63	228	7.3	93.8761	0.99	2.13	1.27	0
632	2	169	70	24.5089	58	1	134	90	1	9.7	4.64	125	6.01	311	8.3	12.6	93	-2.48904	75	327.4	7.2	100.779	1	4.84	1.52	0
633	1	160	99	38.6719	58	1	128	96	1	7.5	3.83	115	7.3	260	10.6	14	94	-2.71898	60	250	4.4	100.934	1.08	1.69	0.86	0
634	2	183	83	24.7843	29	1	107	79	0	10.4	4.13	138	5.15	163	65.4	59.4	93	-1.4927	60	202.1	3.88	129.112	3.41	4.47	0.97	0
635	2	168	77	27.2817	56	1	140	85	1	7.5	4.72	140	8.1	224	9.8	12.7	80	-2.96214	66	267	6.45	106.057	1.27	2.14	1.11	0
636	2	176	70	22.5981	51	1	155	84	1	8.2	3.9	116	5.5	173	43	41	42	-1.83406	60	391	5.47	112.602	0.89	2.96	1.36	0
637	1	160	54	21.0937	60	1	138	76	0	7.3	3.82	110	4.49	157	15	17	54	-2.88602	35	247	6.82	113.515	0.68	3.16	1.47	1
638	2	173	75	25.0593	49	1	132	103	1	6.5	4.92	147	4.1	205	13.7	18.9	55	-2.9245	66	312.7	5.93	110.776	1.9	3.39	1.1	1
639	2	173	65	21.7181	61	1	121	76	0	5.9	4.26	127	8.06	201	19.8	14.7	69	-2.78514	61	182.5	6.5	105.285	1.72	2.44	0.95	0
640	1	155	47	19.563	59	1	132	92	1	7.2	4.3	121	6.05	190	25.8	24.7	63	-2.84667	49	161.7	5.55	105.326	1.88	3.2	1.43	1
641	1	154	62	26.1427	49	1	168	71	1	7.5	4.94	128	8.23	256	18.2	17.3	110	-2.49948	52	403.5	4.36	110.491	2.55	2.07	0.9	1
642	2	171	75	25.6489	62	1	116	76	0	8.9	4.11	116	4.65	125	32	26	60	-2.72061	117	452	9.27	60.7906	1.31	1.11	0.52	1
643	2	180	75	23.1481	61	1	112	70	0	8	4.71	152	8.23	182	25	28	54	-2.62728	77	329	5.97	98.1333	4.62	1.48	0.77	0
644	1	157	69	27.993	57	1	155	92	1	12.4	4.7	138	6.1	165	71	42	89	-2.46224	59	308	3.44	101.976	1.7	2.88	0.72	0
645	2	163	54	20.3244	78	1	161	88	1	9.5	4.22	110	9.52	226	8.9	19.6	58	-2.13646	66	252.5	8.75	92.4948	0.68	1.9	1.18	0
646	2	185	77	22.4982	64	1	131	79	0	7.9	3.64	115	7.02	246	26	18	66	-2.68202	55	283	6.54	106.621	1.17	2.01	0.83	0
647	2	182	97	29.2839	66	1	109	61	0	8.2	5.24	161	6.73	227	46.6	33.1	34	-2.6165	75	265.5	4.22	95.8878	2.96	4.61	1.1	0
648	2	190	108	29.9169	44	1			0	6.4	4.58	142	9.9	245	14.2	15.4	76	-2.63526	61	319.2	6.81	117.027	5.45	2.36	0.58	0
649	1	150	40	17.7778	48	1	92	80	0	9	3.73	106	8.06	340	13	15	115	-2.4457	49	338	12.06	112.784	2.68	3.41	0.93	0
650	1	150	50	22.2222	66	1	117	76	0	7.6	3.11	97	9.83	143	9	43	75	-2.43274	56	361	3.2	97.6456	1.53	2.3	1.19	0
651	1	157	65	26.3702	70	1	105	62	0	8.1	4.48	137	9.44	162	9	14	67	-2.67149	72	346	6.8	77.5282	5.6	2.21	0.81	0
652	2	179	79	24.6559	60	1	112	81	0	8.4	4.07	121	3.38	117	16.3	19.5	61	-2.74494	121	408.1	11.21	59.1179	3.19	2.48	1.13	0
653	2	175	65	21.2245	50	2	144	97	1	6.5	4.41	131	4.51	160	18.8	13	51	-2.9415	59	282.3	4.9	113.881	1.06	1.56	1.06	0
654	1	154	62	26.1427	80	1	158	98	1	8.2	3.37	109	5.79	234	11.3	15.6	76	-2.7772	49	252.1	5.05	92.4304	1.11	2.96	1.31	0
655	2	162	54	20.5761	60	1	148	88	1	6.3	4.91	153	4.32	120	24.5	21.2	67	-2.37651	78	239.4	7.53	98.3615	0.59	2.57	1.08	0
656	2	178	80	25.2493	86	1	118	67	0	7	3.2	102	6.82	199	15	18	56	-2.41622	107	577	11	58.2874	1.21	1.61	0.58	0
657	2	167	78	27.968	65	1	154	85	1	10.2	4.21	124	8.46	93	20.4	20.4	83	-1.84492	116	267.6	7.31	60.2847	1.81	3.23	0.99	0
658	2	174	74	24.4418	65	1	144	80	1	6.6	4.25	123	6.23	222	32	27	127	-3.10624	84	486	8.97	88.8017	1.57	1.53	0.88	0
659	1	156	52.5	21.573	79	1	141	76	1	6.2	4.87	113	5	222	7.7	15.7	68	-2.48226	55	195.4	4.64	90.4535	1.22	2.09	1.52	0
660	2	182	86	25.963	57	1	136	86	0	7	4.32	143	5.2	239	14.5	18.3	62	-2.62824	89	419.8	8.26	87.0756	1.7	3.56	1.21	0
661	2	171	77	26.3329	71	1	138	91	1	5.7	4.5	128	6.59	205	14.1	15.9	123	-2.48374	109	457.3	6.78	62.5805	1.82	2.8	0.75	0
662	1	158	55	22.0317	65	1	136	92	1	7.3	4.11	106	5.09	130	11.7	20.4	107	-2.3112	59	226.1	6.07	97.0268	1.81	3.43	0.73	0
663	1	155	53	22.0604	60	1	152	84	1	7.2	4.85	145	5.11	156	67	31	82	-2.9934	50	372	6.21	104.165	1.33	2.41	1.05	0
664	1	160	67	26.1719	58	1	116	75	0	6.6	3.95	121	7.68	120	25	19	49	-2.70956	81	413	8.12	72.5252	1.92	2.26	0.9	0
665	1	155	50	20.8117	64	1	121	78	0	7	4.49	135	4.84	210	23	20	50	-3.31102	36	222	4.9	109.976	1.13	1.68	1.46	0
666	2	174	75	24.7721	65	1	155	88	1	6.5	3.97	122	3.83	230	14	15.6	64	-2.3206	60	337.7	5.85	103.212	2.42	3	1.24	0
667	2	170	66.5	23.0104	59	1	128	65	0	6	4.17	134	5.26	182	22	16	98	-3.4383	61	244	6.9	106.603	0.63	2.86	1.19	0
668	2	174	82	27.0842	72	1	144	66	1	8.8	4.71	145	3.79	196	16.5	22.6	80	-2.40799	53	360.4	9.18	102.587	2.53	4.08	1.3	1
669	2	172	77.5	26.1966	45	1	125	88	0	7.3	6.24	185	7.07	145	71	39	98	-2.8271	69	400	7.32	112.052	4.82	1.74	0.63	0
670	2	174	60	19.8177	31	1	101	63	0	9	4.67	139	7.29	250	12	14	65	-2.90715	77	332	8.91	118.262	0.64	2.94	1.05	0
671	1	150	66	29.3333	84	1	154	61	1	7.3	3.6	117	7.84	263	12.6	13	65	-2.64716	107	314.8	9.79	44.1758	3.27	4.35	1.49	0
672	2	178	73	23.04	45	1	128	93	1	8.3	4.86	155	8.64	149	118.9	55.7	113	-2.62388	49	268	5.72	124.255	4.92	2.68	0.85	0
673	1	158	82	32.8473	72	1	179	88	1	12	5.62	147	5.44	151	14.4	16	107	-2.2215	56	276.3	5.68	94.069	2.18	1.83	1.03	0
674	2	176	99	31.9602	34	1	146	94	1	8.9	5.54	163	8.04	284	34	17	82	-3.53398	76	447	8.24	116.535	8.29	2.17	0.68	0
675	2	169	70	24.5089	93	2	118	80	0	8.8	4.48	128	6.03	344	41	50	70	-2.34966	110	389	4.7	53.983	1.31	1.74	0.67	0
676	2	175	72	23.5102	80	1	140	83	1	7	4.09	134	5.75	190	11	16	44	-2.95806	103	361	7.4	63.334	1.21	2.33	0.9	0
677	1	154	66	27.8293	70	1	179	99	1	6	3.45	105	6.73	235	25	31	81	-3.1965	80	285	9.41	68.3204	1.29	1.95	1.4	0
678	2	168	75	26.5731	77	1	138	84	0	8.3	4.97	154	6.9	199	19.6	17.6	103	-2.42385	68	255.5	7.95	92.2365	1.36	2.53	0.86	0
679	2	170	67	23.1834	50	1	152	95	1	7.7	4.26	135	11.26	209	12	11	71	-2.68973	144	554	7.67	51.0548	1.05	1.6	0.65	1
680	2	174	92	30.3871	59	1	118	91	1	5.5	4.89	149	5.52	176	37	26	81	-2.5832	61	296	5.03	106.603	1.32	1.52	0.86	1
681	1	158	46	18.4265	54	1	102	64	0	5.3	3.59	111	3.76	168	13	18.4	44	-2.6185	60	348.9	6.1	103.477	0.71	2.08	1.79	0
682	2	176	80	25.8264	73	1	127	74	0	7.7	2.43	76	6.57	104	42	27	60	-2.0613	101	382	7.9	67.7272	0.6	1.29	1.23	0
683	2	163	60	22.5827	55	1	135	87	0	8.8	4.72	145	6.09	210	7	11	103	-2.43808	60	223	4.77	109.835	1.32	3.03	0.74	0
684	2	173	114	38.0901	50	1	147	69	1	10.7	4.49	139	8.65	192	28	20	81	-2.99676	81	456	5.3	101.833	1.39	1.54	0.54	1
685	2	170	77	26.6436	51	1	130	79	0	7.8	4.89	150	5.47	229	26.9	24.9	65	-2.5765	72	412.7	5.6	106.569	1.96	3.57	0.88	0
686	2	160	72	28.125	69	1	144	75	1	7.6	4.22	126	4.77	150	11	23	57	-2.4501	143	575	12.73	45.7456	2.12	3.87	1.06	0
687	2	169	81	28.3604	53	1	157	84	1	5.8	3.55	106	3.57	119	15.4	19.3	39	-1.71342	83	401.3	7.57	97.0677	0.78	3.52	1.54	0
688	1	162	67.5	25.7202	56	1	148	87	1	8.1	4.89	137	5.74	285	13.5	19	63	-2.83924	41	286.3	4.94	112.02	2.75	3.32	1.36	1
689	1	157	60	24.3418	85	1	139	74	0	10.3	3.94	119	5.48	142	64.7	40.4	78	-2.48206	52	182	5.36	88.3263	2.05	1.14	1.18	0
690	1	158	81	32.4467	64	1	141	75	1	6.8	4.34	130	7.68	154	7	15	47	-1.67348	50	427	5	101.605	2.05	5	1.6	0
691	1	160	55	21.4844	52	1	121	86	0	9.2	3.83	117	4.17	219	32	25	49	-2.45914	49	167	4.28	110.013	1.15	2.32	1.02	0
692	1	160	65	25.3906	65	1	156	87	1	7	4.02	123	4.55	153	10.7	17.3	55	-2.48986	74	474.1	5.25	77.3901	1.37	2.52	0.93	1
693	2	192	86	23.329	75	1	115	64	0	13.8	4.79	139	5.8	152	13	15	91	-2.54125	80	523	9.88	88.4787	1.88	2.44	0.52	0
694	2	172	97	32.788	36	1	146	95	1	12.8	5.52	172	6.97	176	43	19	186	-3.47444	73	282	5	116.503	3.8	2.7	0.71	0
695	1	168	61	21.6128	52	1	153	92	1	8	3.78	118	6.02	291	24.6	20.8	42	-2.52902	52	271	4.12	108.448	2.64	2.69	1.07	0
696	2	176	79	25.5036	68	1	156	89	1	7.3	4.37	131	6.08	187	14	15	76	-2.71986	58	478	5.56	102.347	1.4	3.31	0.83	1
697	2	171	70	23.939	66	1	167	94	1	6.6	4.57	137	4.45	143	12	13	46	-3.23262	62	165	7.6	101.562	1.63	2.57	0.82	0
698	1	159	65	25.711	68	1	140	80	1	12.5	5.4	111	6.35	214	19	16	105	-3.12038	61	308	7.7	94.4712	1.24	3.51	1.11	0
699	2	178	62	19.5682	75	1	135	75	0	10.1	3.81	118	5.59	146	18	19	76	-2.4217	50	131	7.99	102.479	0.77	2.2	1.46	0
700	2	168	76	26.9274	67	1	138	85	0	9.3	4.66	140	6.64	150	12	16	70	-2.47561	124	494	16	54.9602	1.94	1.83	0.84	0
701	2	163	85	31.9922	72	1	145	77	1	7.4	5.22	158	10.91	184	22	21	72	-3.26406	78	299	6.5	91.2879	1.49	1.43	0.67	0
702	2	167	70	25.0995	69	1	128	72	0	6.5	3.53	115	6.01	170	20	14	49	-2.49478	72	705	5.57	95.2827	1.31	1.58	0.51	0
703	2	172	62.5	21.1263	63	1	175	100	1	9.7	5.05	153	6.3	185	19	17	106	-2.37609	96	316	6.28	76.6008	1.43	2.52	0.63	0
704	2	170	75	25.9516	28	0	120	80	0	11.3	5.1	149	6.43	163	76.7	32.7	64	-2.91302	66	374	4.44	126.231	7.65	3.4	0.92	0
705	1	150	56	24.8889	70	1	161	74	1	7.5	4.54	132	4.34	159	20	17	80	-3.29888	63	480	7.5	91.0018	1.47	2.24	0.94	0
706	1	148	49	22.3703	57	1	127	73	0	14	4.66	143	5.39	144	24.3	19	77	-2.6017	32	203.4	7.8	118.177	2.56	2.92	1.29	0
707	2	178	82	25.8806	54	1	126	86	0	7.4	5.07	150	6.45	249	12.4	16.7	54	-2.65759	58	227.4	6.38	111.658	1.58	2.67	0.97	0
708	1	160	59	23.0469	64	1	145	70	1	6.7	4.47	136	5.5	116	20.1	21.6	86	-2.72249	58	326.4	5.67	98.0352	1.74	2.42	1.04	1
709	1	160	55	21.4844	83	1	120	77	0	6.6	3.26	104	6.01	188	23.2	11.8	92	-2.5193	94	131	8.7	51.9269	0.84	1.52	1.02	0
710	2	176	67	21.6296	52	1	124	92	1	8.2	4.13	128	6.37	197	24.6	19.8	64	-2.9585	62	423.6	5.1	110.801	2.02	2.64	1.18	1
711	2	178	81	25.565	31	0	128	87	0	9.9	5.77	167	5.33	159	32.1	17.9	114	-2.8561	67	264.3	4.84	123.337	4.9	2.53	0.75	0
712	2	170	80	27.6817	60	1	132	83	0	11	4.94	140	7.45	226	20	14	67	-2.42958	35	231	6	125.294	1.71	3.67	0.86	0
713	2	165	60	22.0386	51	1	136	94	1	11.6	4.67	135	5.05	209	16	14	54	-2.69868	66	184	4.62	109.407	1.8	2.9	0.75	0
714	2	173	62	20.7157	60	1	108	77	0	6.6	4.02	117	3.14	88	10	19	39	-2.69953	57	198	6.27	108.134	1.4	0.79	1.05	0
715	2	169	64	22.4082	59	1	148	81	1	6.3	4.23	127	8.74	175	28	22	55	-2.61677	61	385	4.73	106.603	0.91	1.54	0.85	0
716	2	160	82.5	32.2266	50	1	151	97	1	6.9	5.02	158	9.11	229	28	23	116	-3.76192	79	340	5	104.271	3.27	1.99	0.76	0
717	1	165	55	20.202	69	1	137	74	0	6.3	4.34	134	3.94	230	27	30	90	-2.58648	37	280	5.11	105.907	1.27	3.26	1.47	0
718	1	162	51	19.433	42	1	115	88	0	5.7	3.64	111	4.79	195	7	12	45	-2.98716	41	288	5.75	122.211	0.67	2.26	1.3	1
719	2	165	55	20.202	53	1	133	89	0	6.6	4.93	132	4.7	247	16.1	18.9	148	-2.74873	76	189.8	4.17	103.547	0.62	1.08	1.46	0
720	2	176	68	21.9525	87	2	129	90	1	6.5	4.66	145	5.7	108	11	13	83	-2.95365	68	113	4.56	86.6748	1.03	1.03	1.08	0
721	1	160	62.5	24.4141	55	1	129	65	0	5.6	4.06	126	5.58	180	11.7	16	64	-2.6755	44	310.6	5.93	110.817	3.09	2.04	1.04	1
722	1	161	56	21.6041	55	1	116	80	0	10.2	4.32	130	6.66	197	14	17	95	-2.33459	48	221	8.58	108.517	1.07	2.37	0.96	0
723	2	170	95	32.872	54	1	140	98	1	7.1	5.11	151	8.67	185	31	19	92	-2.8093	73	329	6.88	104.165	1.37	2.97	1.15	0
724	2	165	80	29.3848	89	2	130	80	0	8.8	4.44	148	1.83	37	45	160	62	-1.86917	57	156	5.2	90.2889	2.81	1.75	0.4	1
725	2	175	66	21.551	64	1	140	84	1	8.2	4.96	145	7.67	246	22.1	19.9	123	-2.50686	101	363.2	10.84	71.6262	0.66	2.44	1.05	1
726	1	154	50	21.0828	68	1	148	75	1	6.9	4.52	131	5.06	264	18	15	62	-3.01609	40	223	7.72	104.585	2.5	1.41	0.74	0
727	1	165	76	27.9155	46	1	133	83	0	9.7	4.31	127	4.38	226	53	35	109	-3.01376	41	453	4.66	119.208	2.47	2.82	0.73	0
728	2	178	65	20.5151	69	1	134	83	0	9.9	3.93	116	8.85	184	12	15	70	-2.31908	86	430	8.39	84.2082	1.05	3.03	0.91	1
729	1	149	55	24.7737	93	1	128	69	0	10.9	4.13	130	6	210	31	25	50	-2.4749	87	262.6	3.8	53.5442	1.22	2.19	1.03	0
730	2	175	71	23.1837	59	1	129	86	0	8.5	3.99	129	8.89	260	23	23	126	-2.89992	88	403	9.86	87.1733	0.88	2.24	1	1
731	2	165	75	27.5482	53	2	147	90	1	7.5	5.26	164	6.58	215	27	22	109	-3.22772	62	362	4.7	110.114	1.22	3	1.12	0
732	2	174	70	23.1206	60	1	137	71	0	7.1	4.21	133	10.31	114	15	18	107	-3.31023	64	299	8.24	104.417	1.07	1.89	0.76	0
733	2	172	70	23.6614	48	1	128	90	1	9.8	4.35	131	4.21	104	20	18	88	-2.3735	66	178	9.08	111.467	1.01	2.43	0.95	0
734	2	164	75.5	28.0711	73	1	163	93	1	10.6	4.14	136	5.22	140	24	23	57	-2.5606	67	257	4.5	94.9839	1.83	2.32	0.63	1
735	1	160	64	25	59	1	111	85	0	9.5	3.69	81	8.1	233	145	61	107	-2.47802	76	554	14.91	77.8025	0.83	2.58	1.03	0
736	2	174	82	27.0842	70	1	142	86	1	6.7	4.31	136	4.4	174	17	17	68	-2.86386	73	339	4.9	94.2984	0.78	1	0.96	0
737	2	168	80	28.3447	75	1	125	76	0	6.7	4.8	143	4.76	199	18.6	23.9	57	-2.60576	54	242.5	4.11	100.124	1.27	1.88	0.62	0
738	2	173	85	28.4005	53	1	148	95	1	5.5	4.4	137	6.51	234	20	16	47	-2.47582	43	266	4.25	122.981	1.23	1.91	0.88	0
739	1	160	72	28.125	76	2	163	87	1	8.5	3.92	108	8.28	185	11	13	80	-3.29292	95	445	6.5	53.5531	1.71	1.58	1.08	0
740	2	174	65	21.4692	64	1	150	83	1	5.6	4.21	127	1.95	67	33.5	32.8	99	-2.23114	55	317	4.05	106.621	0.94	0.79	1.26	0
741	2	172	87	29.4078	56	1	130	84	0	5.6	5.06	154	3.35	185	29.9	22.7	88	-2.91188	97	465	10.84	79.0205	2.9	2.06	0.9	0
742	2	175	79	25.7959	55	2	112	77	0	6.5	4.19	133	6.66	171	15.5	21.1	109	-2.74074	55	329.6	5.86	112.76	2.07	3.29	0.93	1
743	2	173	68	22.7204	68	1	151	97	1	8.2	4.5	137	6.15	133	42	19	71	-3.2246	71	328	6.2	96.283	1.24	2.25	0.96	0
744	2	167	82	29.4023	60	1	128	79	0	8.9	3.95	119	4.56	132	16	11	62	-3.03648	129	652	10.81	54.7462	4.66	1.13	0.5	0
745	2	175	71.5	23.3469	53	1	123	85	0	10.1	5.24	148	6.62	185	45.2	32.3	110	-2.91773	69	331.8	4.32	106.614	3.23	2.95	0.8	0
746	2	165	70	25.7117	66	1	119	65	0	14	4.07	122	4.32	123	11.6	11.9	64	-2.27034	68	317.9	6.01	98.7675	1.19	2.14	0.93	0
747	2	165	62.5	22.9568	57	1	121	71	0	5.9	4.41	132	4.76	223	18.2	21.9	35	-2.49662	79	397.3	5.34	99.8291	0.9	1.91	1.27	0
748	2	175	79	25.7959	50	1	150	103	1	7.2	4.65	139	5.97	231	17	17	62	-3.0067	75	325	5.2	105.92	2.34	2.82	0.78	0
749	1	158	59	23.634	72	1	154	102	1	7.2	4.5	136	7.29	185	12.7	19.1	64	-2.60518	59	302	3.92	92.8933	1.02	2.45	1.2	0
750	1	161	80	30.863	52	1	119	75	0	7.5	3.94	113	3.22	182	85	41	104	-3.2501	48	284	4.8	110.561	2.91	2.53	1.04	0
751	1	160	58	22.6562	62	1	149	88	1	10	4.57	133	5.27	220	14.3	17	68	-2.5747	46	225.6	4.48	104.965	0.61	2.48	1.28	0
752	1	158	52	20.83	53	1	115	71	0	5.2	3.41	109	3.76	138	23.3	24.2	65	-2.36753	52	166.6	6.01	107.776	0.72	1.75	1.92	0
753	2	172	82	27.7177	65	1	153	85	1	10.6	4.41	137	6.04	170	13.4	16	116	-2.3805	99	207.6	7.6	72.9112	2.87	3.97	1.26	0
754	1	157	60	24.3418	70	1	150	74	1	8.6	2.68	43	7.33	253	24	28	137	-2.15374	63	348	5.34	91.0018	1.39	2.63	0.81	1
755	2	170	80	27.6817	58	1	140	87	1	9.8	3.17	96	4.62	112	31	24	100	-2.36984	89	387	9	86.5358	1.58	3.7	1.84	0
756	1	158	65	26.0375	52	1	133	89	0	10	3.19	90	6.36	162	18	10	97	-2.52774	65	308	5.5	98.0349	1.9	2.93	0.75	0
757	2	169	64.3	22.5132	70	1	179	107	1	7.5	4.76	147	7.31	188	23	22	78	-3.41726	85	448	5	84.869	1.13	2.97	1.01	0
758	2	160	68	26.5625	70	1	142	87	1	6.7	4.08	138	2.49	118	28.9	26.1	89	-2.51328	58	303.8	6.16	101.082	0.8	1.35	1.2	0
759	2	171	78	26.6749	44	1	126	84	0	7.1	5.35	168	6.61	236	85	42	79	-2.8162	56	254.5	5.46	120.088	1.24	2.21	1.22	0
760	2	165	87	31.9559	59	1	130	87	0	6.4	4.38	127	4.93	310	8.9	13.2	63	-2.45126	80	409.8	11.98	97.736	1.67	2.61	0.96	0
761	1	151	40	17.5431	56	1	116	77	0	8.5	4.45	132	5.85	194	45.7	31.6	139	-2.58774	54	310.6	5.5	104.826	2.27	2.54	1.22	0
762	1	152	62	26.8352	62	1	128	75	0	9.2	4.39	127	5.14	162	10.3	15.2	89	-2.27403	48	262.7	5.91	103.894	0.85	2.72	1.1	0
763	2	159	71	28.0843	68	1	139	77	0	11.9	5.03	144	5.26	172	21.6	17	113	-2.55121	66	434.4	5.28	98.43	1.59	1.6	0.72	0
764	2	170	80	27.6817	56	1	132	78	0	10.7	5.52	163	6.81	168	22	11	94	-3.34366	102	249	7.05	74.3953	2.43	2.81	0.94	0
765	2	174	85	28.075	62	1	141	78	1	8.2	4.06	128	3.91	182	12.5	19.3	47	-2.4372	57	312.3	5.8	106.798	1.14	2.72	1.04	0
766	2	168	60	21.2585	57	1	108	78	0	7.1	4.38	137	4.95	107	30	18	57	-2.09616	42	258	8.2	120.815	1.68	2.65	1.47	0
767	2	182	92	27.7744	50	1	153	97	1	6.3	4.84	144	5.74	217	33	24	73	-3.31698	69	456	5.03	108.621	2.23	1.41	0.83	0
768	2	170	65	22.4913	42	1	119	82	0	7.6	4.55	130	7.49	278	32	22	91	-2.88602	52	304	3.96	124.343	0.89	1.76	0.55	0
769	2	152	49	21.2084	69	1	144	85	1	5.5	3.19	107	4.13	100	25.2	19.5	101	-2.8173	46	217.6	6.5	109.088	0.44	0.97	1.48	0
770	2	170	70	24.2215	57	1	189	114	1	7.5	4.62	127	5.61	149	14.4	18.4	88	-2.21435	70	272.7	5.44	103.543	1.01	1.58	1.23	0
771	1	158	62	24.8358	73	1	150	92	1	11.6	4.58	134	7.57	174	58	43	111	-3.3334	69	322	5.35	80.0823	1.72	3.26	0.84	0
772	1	155	52	21.6441	54	1	126	86	0	12.8	3.96	126	5.97	292	16.5	15.5	56	-2.37192	31	225.9	7.89	121.328	2.58	2.29	1.08	0
773	2	173	80	26.7299	59	1	160	91	1	7.2	4.53	147	5.49	205	40.9	27.6	55	-2.57389	75	461.5	4.19	100.154	2.02	2.01	0.78	0
774	1	157	70	28.3987	59	1	139	78	0	8.5	4.34	127	7.95	335	43	35	59	-3.26964	57	336	7.58	101.556	2.94	2.72	0.98	0
775	2	174	75	24.7721	63	1	130	80	0	7.7	5.04	159	8.69	186	25.4	21.5	61	-2.7881	73	418.7	5.47	98.4943	1.21	2.15	1.15	1
776	1	150	50	22.2222	79	2	187	100	1	7.5	4.87	139	6.13	167	27	21	79	-3.01862	39	396	5.39	98.2667	4.01	1.87	1.15	0
777	2	165	80	29.3848	42	1	140	93	1	7.3	4.37	139	5.91	190	53.9	45.6	70	-2.59228	54	444.2	7.11	122.934	5.98	2.68	1.07	0
778	1	158	60.5	24.2349	75	1	125	75	0	11	4.82	138	7.56	343	15	17	104	-2.85811	41	224	5.32	99.535	2.55	3.6	0.95	0
779	2	172	61	20.6193	54	1	120	80	0	13.5	4.94	155	5.61	125	34	24.2	60	-2.49747	51	271.6	4.54	116.08	1.42	2.36	1.07	0
780	1	156	60	24.6548	70	1	134	70	0	9.4	3.56	109	4.58	129	15.8	20.4	75	-2.77867	48	249.3	4.94	98.8514	1.26	2.35	1.36	1
781	1	153	60	25.6312	80	1	167	96	1	11.7	4.24	128	8.79	233	8	12	39	-2.35031	54	158	11.23	90.2911	1.71	1.57	0.94	0
782	1	150	50	22.2222	59	2	116	69	0	5.7	4.7	92	5.8	131	55	45	87	-3.07073	44	528	5.8	108.094	2.28	1.18	1.03	0
783	2	170	72	24.9135	60	1	110	79	0	8.1	4.61	137	5.63	128	20	15	58	-2.62636	52	139	6.4	111.174	0.9	1.02	0.88	0
784	1	153	62	26.4855	60	1	122	77	0	8.9	4.07	126	8.09	301	32.3	26.5	62	-2.53014	55	293.9	7.62	101.799	1.37	4.07	1.12	0
785	2	175	80	26.1224	66	1	124	73	0	12.1	4.6	107	4.58	269	19	16	67	-2.55934	74	362	6.7	96.2773	1.03	2.48	0.75	0
786	2	170	80	27.6817	57	1	141	96	1	6	4.44	134	4.82	160	26.9	20.8	80	-2.75524	56	264.8	6.52	110.761	2.34	3.66	1.14	1
787	1	155	62.5	26.0146	65	2	142	70	1	10	3.93	112	6.56	333	8.5	13.6	62	-3.23324	60	222	6.2	96.6346	0.86	3.07	1.13	0
788	2	176	81	26.1493	44	1	103	74	0	11.7	5.03	161	5.2	210	16	17	95	-3.03018	57	256.7	8.07	119.448	1.34	2.76	1.2	0
789	2	158	58	23.2335	66	1	141	85	1	8.8	5.28	158	10.72	351	33.2	28.9	103	-2.95872	79	394.2	4.82	94.3948	1.04	1.41	0.87	0
790	1	155	64	26.6389	66	1	160	83	1	6.7	3.41	107	3.94	171	14.4	19.1	58	-2.98492	98	310.8	6.22	54.9024	1.29	2.38	1.21	0
791	1	159	59	23.3377	51	1	169	97	1	12.9	3.77	101	4.99	284	9.3	15.8	68	-0.908696	79	333.9	5.87	78.0594	6.55	7.59	2.03	1
792	2	163	55	20.7008	53	1	121	68	0	7.3	4.92	141	8.36	223	40.2	25.8	94	-2.87384	74	231	6.8	104.385	0.95	1.15	1.06	0
793	2	165	63	23.1405	57	1	119	70	0	6.8	4.78	139	9.45	277	14.5	18.7	63	-2.62674	82	402.9	4.91	96.0701	2.46	3.68	1.23	0
794	2	168	72	25.5102	28	0	141	92	1	7.5	4.98	153	4.96	194	14.3	15.4	49	-3.20864	75	411.8	8.2	121.451	2.01	3.88	0.98	0
795	2	172	60	20.2812	70	1	152	100	1	9.4	4.2	147	5.35	147	16	19	101	-2.03358	64	312	5.84	98.1208	1.12	3.11	0.94	1
796	2	171	60	20.5191	52	1	134	79	0	13.3	4.62	140	4.19	248	23	23	114	-2.85482	45	210	5.7	122.061	0.81	2.85	2.2	0
797	2	173	70	23.3887	59	1	102	73	0	7	4.46	137	5.77	134	14.5	15.6	55	-2.63764	56	220.2	4.67	109.392	0.98	2.31	1.21	0
798	2	168	77	27.2817	71	1	131	93	1	8	5.22	148	5.14	107	14	16	102	-2.86492	145	360	9.2	44.4333	6.15	2.61	0.75	0
799	2	160	65	25.3906	68	1	111	59	0	7.1	4.19	126	7.46	226	24	20	68	-2.6922	81	240	6.2	91.0482	1.1	1.78	0.87	0
800	2	176	60.5	19.5312	61	1	138	91	1	8.9	4.14	115	4.64	174	8	11	46	-2.41176	72	351	6.9	100.143	2.07	1.93	1.2	0
801	1	159	70	27.6888	53	1	139	100	1	9.2	4.15	124	7.3	278	28	22	67	-3.16096	56	308	6.84	105.868	2.89	3.61	1.29	0
802	2	170	60	20.7612	52	1	115	81	0	7.5	5.66	162	4.87	225	21	20	67	-3.3576	84	369	12.2	96.2797	0.9	2.18	0.81	0
803	2	178	69	21.7776	79	1	138	77	0	9.1	3.67	110	10.54	104	11.4	15.5	59	-2.16002	49	273.3	7.17	100.573	1.36	1.95	1.07	0
804	1	158	55	22.0317	48	1	139	81	0	8.3	4.25	124	7.55	419	11	19	78	-3.61868	43	169	4.6	116.391	1.37	2.4	1.33	0
805	1	157	56	22.719	43	1	156	98	1	6.4	3.44	104	6.53	143	28	29	94	-1.79992	128	270	9.76	45.9763	3.1	4.56	1.83	1
806	1	160	60	23.4375	69	1	142	93	1	9.7	4.4	121	8.23	233	23	49	47	-2.94809	142	569	10.3	34.5314	4.19	2.47	0.87	0
807	2	172	57	19.2672	69	1	128	76	0	5.8	4.35	135	6	199	27.3	25.4	65	-2.68054	99	338.2	9.01	71.1198	1.79	2.8	1.58	0
808	2	176	96	30.9917	35	1	129	81	0	10.6	4.67	144	6.9	242	37.1	21.1	94	-2.58611	40	333.9	6.26	140.586	5.71	2.84	0.88	0
809	1	158	90	36.0519	20	0	129	89	0	9	4.48	131	6.68	246	25	21	76	-3.04604	44	416	2.75	137.765	1.68	2.44	0.61	0
810	1	162	69	26.2917	67	1	147	85	1	8	4.23	122	4.83	185	18	14	152	-3.18608	45	163	5.3	102.292	3.96	3.11	1.08	0
811	1	158	65	26.0375	48	1	120	88	0	5.6	3.79	116	4.87	327	24	14	66	-1.35971	70	326	6.62	91.9524	2.39	4.27	1.28	0
812	2	175	100	32.6531	58	1	153	98	1	11.6	5.38	158	6	177	22.8	14.5	81	-2.42507	76	350.5	8.1	100.377	9.35	3.43	1.01	0
813	2	165	69	25.3444	68	1	165	82	1	9.1	4.71	139	8.67	222	19.9	20.4	63	-2.32312	79	294.3	6.27	93.228	1.87	2.4	0.89	0
814	2	180	78	24.0741	54	1	141	95	1	6	3.69	116	4.5	171	11.7	15.1	46	-2.50572	64	362.1	8.26	108.387	1.43	2	1.35	0
815	1	156	62	25.4767	46	1	159	98	1	7.8	4.56	134	5.55	258	15.2	15	64	-2.54892	38	296.6	3.7	121.411	0.98	2.5	1.54	0
816	2	170	70	24.2215	36	1	123	85	0	11	5.16	167	7.79	234	53.2	42.8	75	-3.37141	54	496.7	9.39	127.608	18.3	0.92	1.15	0
817	2	175	83	27.102	23	1	133	88	0	11.4	5	150	7.03	254	16	15	47	-3.04874	56	493	2.77	136.843	2.17	6.44	0.86	0
818	1	150	67	29.7778	74	1	192	101	1	7.1	3.35	96	6.01	257	11.4	19.2	74	-2.3991	150	349.6	16.85	31.3433	1.44	2.22	1.26	0
819	2	170	65	22.4913	75	1	120	67	0	6.5	4.33	137	6.14	175	15	23	68	-2.82318	91	251	5.2	75.8048	0.8	1.6	1.33	0
820	2	168	75	26.5731	52	1	155	94	1	7.9	4.64	131	6.85	173	34	26	124	-3.27864	78	339	6.4	103.379	1.81	2.52	0.89	0
821	2	169	74	25.9095	30	1	117	78	0	7.9	5.46	159	5.43	191	64.4	34.7	56	-2.99024	47	358.3	4.42	138.132	2.95	2.28	0.84	1
822	1	160	49	19.1406	57	1	121	71	0	7.2	3.91	113	10.88	324	13	14	68	-2.89544	35	315	2.99	115.652	1.59	1.9	0.73	0
823	2	172	57	19.2672	50	1	120	89	0	10	4.61	140	6.81	143	14	9	78	-2.51338	57	234	6.65	115.073	1.59	2.58	0.87	0
824	1	165	71	26.079	69	1	131	72	0	7.7	3.84	104	5.34	272	18.1	15	91	-2.2842	30	361	3.25	111.398	1.34	1.39	1.28	0
825	2	167	80	28.6851	53	1	131	86	0	9.3	4.51	136	7.21	272	12.2	16.1	62	-2.49296	68	382.1	6.39	107.085	2.62	3.58	1.09	0
826	2	170	75	25.9516	56	1	114	72	0	7.6	4.86	137	6.3	281	21	16	81	-3.19947	66	282	7	106.057	1.49	2.19	0.76	0
827	2	169	79	27.6601	43	1	145	112	1	11.4	5.14	148	7.22	194	25.1	22.8	137	-2.52743	73	349.3	3.95	111.54	7.4	3.01	0.99	0
828	1	150	70	31.1111	66	1	133	74	0	7.3	4.53	135	10.64	265	32	21	103	-2.65609	36	342	5.71	108.617	1.63	1.66	0.73	0
829	1	150	43	19.1111	57	1	135	84	0	9	3.87	107	4.81	204	16	23	133	-3.12726	94	404	17	61.0405	1.92	4.39	1.83	0
830	2	160	48	18.75	73	1	143	74	1	7	4.98	152	4.19	96	25.1	26.4	87	-2.83122	93	375.6	7.63	74.7772	1.1	2.58	1.73	0
831	1	152	64	27.7008	67	1	119	77	0	6.6	4.14	122	5.04	294	16.9	18.5	68	-2.28698	65	386	6.88	89.3029	1.48	2.7	1.14	0
832	2	158	60	24.0346	65	1	152	82	1	11.2	4.4	129	5.4	229	14	16	58	-2.79123	80	355	7.92	94.1561	1.98	2.43	0.98	0
833	2	173	65	21.7181	36	1	140	88	1	8.8	4.36	124	7.73	197	21	21	36	-3.02066	51	370	6.28	129.83	1.91	1.87	0.54	1
834	2	172	97	32.788	61	1	126	70	0	7.5	4.38	129	6.8	202	22	16	79	-2.85973	48	213	6.1	113.188	1.95	1.48	0.56	0
835	2	175	97	31.6735	71	1	164	89	1	6.7	4.65	142	7.17	213	23	17	58	-3.02849	79	397	6.3	91.5047	0.96	2.98	1.18	0
836	2	170	80	27.6817	53	1	144	92	1	5.6	4.05	128	6.09	109	20	18	61	-3.06786	55	269	5.8	114.171	1.83	2.09	0.94	0
837	1	167	71	25.4581	48	1	159	79	1	9.7	3.72	111	7.13	299	10.8	15.7	60	-1.58146	62	328.2	2.63	106.368	24.42	4.79	1.6	0
838	1	159	61	24.1288	60	1	130	83	0	6.7	3.76	101	3.07	229	88.1	66	171	-2.66758	62	431.1	5.8	98.7185	3.61	3.01	0.96	0
839	1	160	65	25.3906	69	1	150	90	1	10.5	4.74	136	6.76	264	15.7	15.2	72	-2.34401	52	305.3	3.94	97.5677	1.87	4.44	1.24	0
840	1	175	83	27.102	53	1	129	78	0	6.8	4.27	129	5.4	145	17.6	17.2	56	-2.24448	48	254.9	6.88	109.875	1.26	2.69	1.64	0
841	2	150	59	26.2222	76	1	142	84	1	7	4.74	143	5.26	102	20.9	25.8	96	-2.3664	74	314.7	5.46	90.4719	1.59	1.44	1.19	0
842	2	165	62	22.7732	58	1	155	92	1	7.6	4.56	134	10.88	250	19.7	15.2	116	-2.5543	57	332.4	3.66	109.488	0.99	2.78	0.97	0
843	2	165	60	22.0386	46	2	141	95	1	13.6	5.02	154	8.72	229	14	10	142	-2.66759	75	252	5.2	108.588	2.3	2.7	1.05	0
844	2	173	89	29.737	57	1	131	76	0	8.4	5.14	135	6.89	210	17	17.2	79	-2.37067	92	339	12.05	83.6795	4.03	2.87	0.84	0
845	1	155	52	21.6441	80	1	117	81	0	8.1	4.6	129	5.54	312	10	11	112	-2.99342	55	250	5.76	89.8927	1.46	3.41	1.15	1
846	2	170	90	31.1419	50	1	137	86	0	8.1	4.95	146	6.95	85	40	23	63	-3.4665	58	455	3.3	114.47	2.68	1.2	0.79	0
847	2	170	81	28.0277	69	1	168	101	1	6.9	5.11	154	4.81	214	11	12	51	-3.09066	71	333	8.3	95.686	2.05	2.6	0.87	0
848	1	165	80	29.3848	69	1	123	43	0	6.6	3.6	104	4.43	244	17	22	89	-3.51678	68	407	5.2	83.5505	1.13	1.44	1.14	0
849	2	177	73	23.3011	23	0	123	69	0	11.4	5.26	156	5.43	242	24	13	69	-2.82909	53	249	3.78	139.137	1.53	3.04	0.73	0
850	2	172	80	27.0416	57	1	125	71	0	6.5	3.81	111	6.82	335	21	19	99	-3.4434	70	283	7.13	103.543	1.17	1.72	0.75	0
851	2	170	72	24.9135	70	1	120	73	0	6.9	1.82	60	8.3	105	24.4	18.9	34.5	-2.68661	51.7	222.9	3.41	104.653	1.24	0.83	0.62	0
852	2	181	84	25.6402	47	1	136	99	1	6.1	4.67	133	4.68	200	14	13	62	-2.56294	59	332	4.67	116.026	0.88	1.64	0.75	0
853	2	165	60	22.0386	49	1	150	70	1	7.5	4.68	103	5.55	230	16	16	83	-2.3622	53	314	5.9	118.363	0.59	2.64	1.09	0
854	2	171	70.5	24.11	55	1	106	75	0	12.8	4.59	132	5.24	217	10	10	58	-2.79705	66	337	6.35	106.719	1.28	3.34	0.8	0
855	2	163	55	20.7008	67	1	96	41	0	9.6	3.44	113	5.92	120	12	15	142	-3.55217	124	426	13.5	54.9602	1.51	1.43	1.3	0
856	1	152	45	19.4771	85	2	125	91	1	7.1	4.12	126	6.32	110	9.4	18.2	55	-3.01948	116	457	11.5	39.8468	1.07	2.58	2.37	0
857	2	171	66	22.571	63	1	129	86	0	10.5	4.69	133	8.39	183	14	17	115	-2.61368	132	401	10.01	52.2721	1.49	2.43	1.25	0
858	1	159	60	23.7332	78	1	130	78	0	7	4.97	147	5.51	222	24.3	17.9	78	-3.37966	63	228	6.2	86.5849	1.5	1.91	1.03	0
859	2	173	55	18.3768	75	1	140	75	1	14.3	4.29	114	4.39	215	9.6	19.2	69	-2.60115	68	381.9	8.78	93.391	1.25	3.19	1.14	1
860	2	175	77	25.1429	53	1	146	86	1	6.4	4.22	133	7.91	256	13.6	16.2	54	-2.608	77	260.2	5.94	103.139	0.96	2.14	1.19	1
861	1	160	66	25.7812	64	1	159	76	1	10.8	4.32	122	5.16	122	12.6	22.3	79	-2.30778	72	249.1	5.93	80.4759	0.98	3.07	1.51	0
862	2	173	70	23.3887	48	1	124	79	0	11	4.67	136	6.55	220	17	28.2	78.1	-2.11946	49.7	261.4	4.4	121.437	1.02	4.93	0.67	0
863	1	165	55	20.202	41	1	135	89	0	10.2	3.83	113	6.29	222	12.7	15.7	43	-2.59056	44	329.5	4.19	120.898	1.63	2.27	0.93	0
864	2	170	87	30.1038	53	1	195	125	1	7	5.25	167	9.93	154	28.3	20.6	71	-2.77515	56	325	4.04	113.551	3.66	1.61	0.79	1
865	2	168	90	31.8878	51	1	118	79	0	9.4	5.27	157	6.72	213	49	21	72	-2.99989	61	342	5.5	112.041	2.01	2.98	0.85	0
866	1	162	53	20.1951	53	1	149	57	1	14.8	4.57	131	5.19	251	32.6	35.1	132	-2.35182	46	194.7	4.38	111.008	1.68	3.72	1.62	0
867	1	162	64	24.3865	67	1	153	77	1	8.9	3.23	91	3.07	92	29	34	81	-2.51798	52	260	6.5	98.7889	0.9	1.44	0.79	0
868	2	162	70	26.6728	80	1	128	59	0	5.4	3.37	107	4.86	128	16.3	24.6	40	-2.13596	67	385	7.99	90.9375	0.75	2.27	1.44	0
869	1	162	73	27.8159	81	1	117	65	0	6.8	3.8	123	5.7	171	22.8	23.1	80	-2.5089	43	279.3	6.4	94.7949	0.87	1.22	1.17	0
870	2	175	83	27.102	41	1	113	79	0	8.5	5.8	169	8.05	170	32	17	95	-2.83461	57	292	5.54	121.698	2.04	1.34	0.64	0
871	2	168	58	20.5499	67	1	120	75	0	7	4.93	157	4.25	167	26	15	71	-3.39005	78	429	7.89	94.1712	0.76	1.66	1.52	1
872	2	171	72	24.623	49	1	149	101	1	9.2	4.71	148	6.18	152	34.5	20.6	53	-2.80928	54	346.2	5.22	117.697	1.2	2.51	0.84	0
873	1	165	85	31.2213	48	1	129	90	1	7.9	5.01	150	8.35	194	35.7	34.9	57	-2.86878	56	475.4	6.23	109.212	4.15	1.36	1.14	0
874	1	165	70	25.7117	56	1	135	84	0	7.7	4.82	141	8.18	250	13	15	68	-2.55061	70	382	8.21	87.4893	0.79	2.99	1.06	1
875	1	158	67	26.8386	62	1	156	89	1	6.5	4.2	131	6.49	211	12.5	16.5	103	-2.8675	50	340	5.75	102.877	2.7	4.12	1.24	1
876	1	150	60	26.6667	79	1	143	76	1	6.3	3.52	121	6.36	197	18	22	95	-2.99716	44	215	4.7	95.4511	2.72	2.01	1.34	0
877	1	146	48	22.5183	68	1	157	74	1	9.4	4.37	136	4.83	139	16	20	116	-2.42194	43	182	5.53	102.778	0.72	1.57	1.19	1
878	1	154	79	33.3108	72	1	129	74	0	6.8	4.18	130	7.37	178	13	19	75	-2.56644	49	215	6.12	97.1455	1.1	3.66	1.07	0
879	1	158	60	24.0346	61	1	126	78	0	8	4.66	136	6.33	133	25	26.5	107	-3.12851	50	263	7.96	103.519	2.29	2.01	1.05	0
880	1	153	54	23.0681	46	1	154	99	1	10.9	4.29	125	5.37	176	28.4	20	110	-2.41814	37	221.7	5.72	122.194	2.29	2.8	0.95	0
881	2	165	76	27.9155	45	1	133	92	1	9.5	4.49	137	4.7	139	26.7	23.7	41	-2.62873	60	309.1	4.6	116.883	2.69	2.91	0.95	0
882	2	170	67	23.1834	67	1	109	79	0	7.1	4.47	137	5.99	264	34.6	24.6	166	-3.26809	89	350	7.5	81.8251	2.22	3.79	1.43	0
883	2	167	81	29.0437	40	1	109	74	0	9.3	4.72	137	5.64	181	58.5	39	75	-2.85459	81	114.7	5.48	108.368	6.35	4.09	1.26	0
884	1	170	71	24.5675	69	1	125	69	0	7.6	4.01	120	3.92	168	15.8	16.2	55	-2.72374	77	253.7	5.55	71.9732	2.08	2.31	1.08	0
885	2	180	75	23.1481	47	1	103	73	0	10.7	4.59	135	8.31	184	8	13	98	-3.02688	174	606	11.4	41.4491	4.28	2.49	0.69	0
886	2	165	68	24.977	67	1	130	80	0	7.8	4.69	126	6.13	232	26	18	82	-2.79084	57	163	5.8	103.528	1.28	3.08	1.07	0
887	1	150	55	24.4444	74	1	158	81	1	9.7	4.57	130	3.99	160	15.8	20.9	150	-2.81573	47	143.7	5.7	96.9131	1.56	2.18	1.3	0
888	1	152	52	22.5069	72	1	138	76	0	9.2	4.12	118	5.96	214	9	16.4	111	-2.37806	58	286.9	3.6	93.2768	2.13	3.2	0.95	0
889	2	171	72	24.623	68	1	140	51	1	6.9	2.82	87	15.48	242	15	13	82	-2.06924	123	877	29.6	55.1528	1.94	2.49	1.15	0
890	1	165	86	31.5886	39	1	153	103	1	10.2	4.52	134	7.85	240	143.1	117.7	104	-2.62803	46	347.5	3.66	121.107	2.43	2.86	0.94	0
891	2	173	60	20.0474	53	1	130	93	1	10.1	4.87	155	4.66	142	42.8	20.8	83	-2.74536	58	278	7.08	112.354	0.88	3.3	2.02	0
892	2	170	61	21.1073	50	1	125	77	0	9.6	5.27	158	7.57	200	20.6	22.5	88	-2.51406	75	256.8	4.79	105.92	1.89	2.24	0.93	0
893	1	152	58	25.1039	76	1	146	86	1	8.8	4.33	128	6.95	230	13	16	77	-3.44512	86	285	9.1	60.3468	1.21	1.46	0.92	0
894	1	163	50	18.8189	40	1	109	81	0	5.9	3.93	98	5.62	309	24.7	25.1	51	-2.34942	51	251.8	3.5	117.4	0.43	1.62	1.23	0
895	1	160	80	31.25	67	2	127	71	0	7.8	4.62	130	9.05	236	8.3	13.8	61	-2.48896	43	270.3	6.29	103.419	1.64	2.2	0.98	1
896	2	165	55	20.202	71	1	100	80	0	7.5	4.31	141	18.36	183	107	758	50	-2.63949	83	405	11.1	86.7874	1.31	3.16	1.33	0
897	2	177	73	23.3011	50	1	127	83	0	6.8	4.43	146	7.07	243	11.1	12.2	73	-2.65614	56	343.2	5.81	115.69	1.08	2.34	0.84	0
898	1	170	63	21.7993	37	1	127	92	1	11.1	4.48	135	5.71	237	15	17.5	59	-2.35644	47	218.7	2.72	121.989	2.18	3.18	0.99	0
899	2	173	80	26.7299	77	2	133	86	0	7.7	3.9	121	5.6	260	27	21	109	-2.91302	93	434	7.69	72.9399	0.85	1.79	1.17	0
900	2	160	75	29.2969	82	1	132	73	0	9.1	4.29	131	7.16	225	26.4	30	83	-2.69182	61	294.6	6.7	92.3945	3.4	1.99	0.79	0
901	2	172	92	31.0979	66	1	141	96	1	7.1	3.91	117	6.17	289	19.3	20.9	63	-2.79252	81	378.3	5.5	92.1878	0.78	2.3	0.65	0
902	1	167	68	24.3824	66	1	147	85	1	6.8	4	115	3.87	146	16	19	92	-3.27392	65	320	4.8	89.8601	1.44	1.77	1.15	0
903	2	170	84	29.0657	50	1	132	96	1	7.1	4.91	152	8.98	359	29.7	18.5	97	-2.71752	59	354	4.69	113.881	1.99	3.06	0.96	0
904	2	174	95	31.378	34	0	200	141	1	8.8	4.32	129	8.68	268	29	24	76	-3.03116	242	421	9.15	30.2489	3.74	4.06	0.72	0
905	2	172	70	23.6614	53	1	137	91	1	6.8	4.62	137	6.09	287	38	32	77	-2.82844	97	433	4.98	80.5087	1.85	2.17	0.53	1
906	2	170	80	27.6817	61	1	148	89	1	7.4	4.19	125	8.13	244	17	21	189	-2.95641	171	373	14.42	38.7941	1.63	2.29	1.05	0
907	1	162	74	28.1969	82	1	170	91	1	7.9	3.62	114	3.4	143	30.1	39	60	-2.49632	49	203.6	4.66	91.2878	1.74	1.99	1.07	0
908	2	170	62	21.4533	76	1	127	56	0	7.1	3.4	102	5.64	156	10	19	70	-2.84204	122	347	11.7	52.9924	0.44	1.51	1.01	0
909	2	171	74	25.3069	57	1	158	110	1	11.3	5.09	155	5.74	233	31.5	28.4	77	-2.63151	50	461.6	5.86	114.618	1.08	4.12	1.23	0
910	2	165	58	21.3039	61	1	148	89	1	10.5	4.67	154	11.74	269	15	17	111	-3.19924	86	289	8.54	88.5039	1.88	2.52	0.89	1
911	2	170	75	25.9516	48	1	140	91	1	9.8	4.62	140	6.32	186	9	8	97	-2.65653	42	275.4	4.8	127.77	1.02	2.51	0.78	0
912	2	166	80	29.0318	68	1	173	94	1	9.2	5.09	149	6.48	167	18	17	71	-2.82636	52	248	6.5	105.778	2.66	1.43	0.74	0
913	1	164	81	30.116	62	1	148	88	1	10.1	4.31	130	6.34	222	32	29	101	-2.95884	48	304	5.12	103.894	5.54	3.07	0.81	0
914	2	175	77	25.1429	77	1	158	82	1	6.6	4.49	146	5.78	127	11.8	20.2	77	-2.73061	95	673.1	8.9	71.1011	2.41	2.67	0.93	1
915	2	162	60	22.8624	65	1	120	79	0	7.4	4.42	137	3.95	217	14	19.4	52	-2.61199	67	298.8	7.15	99.8293	0.81	1.7	0.88	0
916	2	170	64	22.1453	49	1	132	77	0	6.8	4.62	139	6.03	158	32	18	102	-3.01884	72	251	4.76	107.903	1.92	2.14	1.05	0
917	1	155	50	20.8117	54	1	99	67	0	9.6	1.93	68	3.32	120	12.5	13.1	169	-1.69922	34	118.6	2.91	118.657	1.03	1.4	0.86	0
918	2	175	80	26.1224	50	1	106	72	0	10.2	3.58	113	4.27	92	8	21	51	-2.47994	149	320	10.4	49.0059	3.76	2.09	0.58	0
919	2	170	75	25.9516	34	1	149	94	1	12.9	4.06	128	3.69	107	73	57	65	-2.58518	67	337	3.57	121.057	1.51	3.09	0.79	0
920	2	167	73	26.1752	50	1	152	105	1	9.1	4.58	136	5.41	136	32.6	21.1	44	-2.54839	69	302.1	5.77	108.621	5.29	3.11	1.07	0
921	2	175	75	24.4898	58	1	131	86	0	6	4.89	143	4.71	147	16	16	61	-2.63099	52	197	4.66	112.566	0.74	1.27	1.14	0
922	2	160	65	25.3906	71	1	145	86	1	7.8	4.32	137	8.83	152	35.3	31.7	73	-2.54347	74	382.8	7.97	93.3294	1.55	3.05	0.91	0
923	1	146	70	32.8392	74	1	102	64	0	7.2	3.94	125	6.44	160	12	16	41	-2.76136	37	346	4.91	102.665	1.22	2.68	1.13	0
924	1	158	52	20.83	55	1	130	74	0	10.7	3.7	113	4.75	215	17	20	74	-2.49566	45	186	5.22	110.218	1.21	2.98	1.57	1
925	2	168	70	24.8016	38	1	159	115	1	7	4.49	137	7	201	42	23	50	-2.62763	88	436	7.5	99.3355	1.04	1.68	1.11	0
926	2	165	58	21.3039	62	1	117	84	0	7.7	3.89	113	5.09	222	18.5	20	81	-2.8628	91	433.9	7.35	82.1883	2.85	2.05	0.83	0
927	1	163	48.5	18.2544	41	1	99	75	0	5.4	3.54	110	5.08	181	7	10	35	-2.80016	44	244	5.95	120.898	0.87	1.88	1.12	0
928	2	165	69	25.3444	44	1	139	91	1	9.2	4.45	130	3.32	198	19.8	20	54	-2.44378	52	313.9	4.45	122.806	0.63	2.33	1.16	0
929	2	167	74	26.5338	75	1	109	64	0	6.3	5.01	146	12.04	224	28.5	26.4	97	-2.78199	51	288.6	8.19	101.868	1.65	2.68	1.09	0
930	2	171	72	24.623	67	1	125	64	0	6.6	3.34	105	3.36	100	7.2	14.4	42	-2.69346	121	691.4	7.54	56.5994	2.22	2.7	1.09	0
931	1	163	79	29.7339	70	1	99	73	0	8.1	4.03	122	4.83	135	15	15	63	-2.88132	74	446	8.22	75.0206	1.24	3.17	0.97	1
932	2	163	66	24.841	79	1	190	110	1	12.9	3.82	116	5.75	133	18.3	20	67	-2.9755	84	317.6	8.61	81.3968	1	3.03	1.52	0
933	2	169	65	22.7583	39	1	130	83	0	10	5.16	143	7.22	260	19.1	15.9	89	-2.6667	50	250.2	3.8	128.195	1.44	2.2	0.93	0
934	1	158	77	30.8444	69	1	135	75	0	9.9	4.59	128	6.51	180	24.7	18.6	102	-2.95199	55	244.8	4.8	96.2577	4.68	2.07	0.89	1
935	2	176	83	26.7949	52	1	112	74	0	7	4.19	135	5.52	75	30	26	56	-2.76646	80	578	7.45	102.085	6.63	1.82	0.9	0
936	2	165	67	24.6097	75	1	115	77	0	8.6	4.99	138	9	256	10.2	16.4	67	-2.24138	89	545.7	8.41	77.8536	1.96	2.79	0.87	0
937	1	155	68	28.3039	55	1	146	96	1	7.5	4.13	123	8.72	273	17	39	96	-3.35667	46	274	2.7	109.636	2.15	2.5	0.94	0
938	2	172	78	26.3656	84	1	135	78	0	7.1	1.53	68	4.35	95	13	22.5	50	-2.5879	55	348	4.59	94.1508	1.2	0.84	0.68	0
939	2	173	74	24.7252	68	1	132	71	0	8.5	3.95	123	7.16	149	24.8	22.1	69	-2.48688	98	491.6	7.26	72.4406	1.75	2.44	0.73	0
940	2	177	77	24.5779	60	1	90	68	0	6.5	4.51	136	7.64	170	16.3	17	34	-2.64573	78	342.1	6.85	98.3615	0.95	2.2	1.13	0
941	2	168	77	27.2817	49	1	126	90	1	10.1	4.49	140	5.58	151	11.5	11.5	62	-2.54297	61	259.4	6.57	113.443	0.65	2.97	0.96	0
942	2	178	85	26.8274	58	1	150	87	1	6.5	4.76	156	11.24	155	22.6	21.3	69	-2.40446	76	322.7	6.5	100.377	4.72	2.35	0.93	0
943	1	153	68	29.0487	70	1	154	89	1	7.7	4.04	126	4.69	146	54	50	86	-2.24429	56	299	3.47	95.2464	1.04	2.21	0.42	1
944	2	175	91	29.7143	58	1	138	97	1	9.1	4.36	137	6.08	98	38.5	25.2	43.7	-2.84694	74.1	308.8	6.98	101.147	1.84	1.92	0.76	1
945	2	170	69	23.8754	66	1	106	73	0	7.6	3.89	117	7.97	105	20	24	69	-3.17502	121	379	9.5	56.9525	1.56	1.2	0.71	0
946	2	175	71	23.1837	62	1	145	81	1	7.8	3.55	108	8.33	183	80.8	42.2	103	-2.08566	62	169.2	4.02	104.12	0.81	1.63	0.67	0
947	1	155	55	22.8928	59	1	152	98	1	6.5	3.96	115	3.82	267	22.1	21	117	-2.58724	38	201.3	4.71	111.981	1.49	1.54	1.02	0
948	2	163	67	25.2174	51	1	117	75	0	7.5	4.12	131	3.79	248	11.4	14.5	37	-2.60886	71	436.8	5.49	107.02	1.32	2.37	1.02	1
949	2	164	80	29.7442	24	0	146	100	1	11.8	5.87	172	8.35	218	17	10	121	-3.2257	57	361	6.2	135.269	5.74	1.97	0.67	0
950	1	155	50	20.8117	66	1	135	65	0	7.9	2.92	90	5.1	150	14.7	19.7	52	-2.77664	75	277.9	9.35	75.6814	1.12	2.03	1.86	0
951	2	160	78	30.4687	70	1	139	81	0	6	4.09	135	7.49	254	12.9	15	74	-2.37512	55	284.8	4.94	102.716	0.78	0.96	0.93	0
952	2	160	70	27.3437	77	1	146	90	1	6.9	4.66	142	5.01	163	88	78	66	-2.79422	75	284	5.3	89.5472	0.85	1.91	1.39	0
953	1	150	70	31.1111	67	1	155	78	1	7.3	4.31	122	7.43	192	28	25	125	-2.92336	68	293	4.6	84.5962	1.39	3.36	1.08	0
954	1	166	66	23.9512	60	1	153	91	1	10.9	4.12	120	6.87	225	20	17.4	87	-2.66652	83	421	6.73	69.5625	2.4	4.02	0.69	0
955	1	152	44	19.0443	73	1	128	66	0	11.3	3.62	108	13.49	291	13.3	28.4	63	-2.33522	72	213.5	6.08	76.0951	2.44	1.86	0.95	0
956	2	168	74	26.2188	39	1	133	92	1	8.6	4.84	151	8.08	267	61	27	110	-3.08408	63	326	4.5	119.552	2.17	3.16	0.94	0
957	2	165	67	24.6097	49	1	121	81	0	7.3	3.65	112	6.61	127	10.2	15.7	82	-2.06472	150	477.7	8.12	48.9174	0.77	1.97	0.87	1
958	1	157	60	24.3418	54	1	121	60	0	8.9	4.16	124	9.84	328	11.5	13.2	64	-2.75704	46	313.9	6.68	110.32	1.39	2.65	1.05	0
959	2	160	77	30.0781	71	1	127	83	0	8.4	4.14	129	6.35	235	13.9	19.6	80	-2.26235	57	200.2	7.56	100.984	0.9	1.45	0.92	0
960	1	158	66	26.4381	54	1	111	74	0	10.6	4.48	142	5.9	203	16.6	16	52	-2.6002	41	310.5	5.18	113.422	1.23	1.62	0.95	0
961	2	173	65	21.7181	89	1	142	70	1	5.9	4.61	144	4.82	154	12	14	105	-2.84865	134	324	5.6	43.6724	0.99	0.97	0.65	0
962	1	155	50.5	21.0198	73	1	115	78	0	7.4	4.56	125	5.2	305	18	22	65	-2.92002	48	259	4.77	97.0241	3.68	1.84	0.86	0
963	1	150	57	25.3333	79	1	142	81	1	8.8	3.63	102	3.42	214	26	18	69	-2.74158	80	367	12.7	64.6014	1.51	0.87	0.68	0
964	2	173	72	24.0569	72	1	143	80	1	7.5	4.95	146	7.29	156	39.1	26.8	85	-2.14024	82	272.2	6.46	87.5131	0.86	3.34	0.83	0
965	1	157	58	23.5304	70	1	163	89	1	10.7	4.58	132	5.03	205	14.1	18.6	86	-2.77976	66	308.1	9.75	86.0609	0.94	2.05	1.57	0
966	1	160	54	21.0937	53	1	97	69	0	6.5	4.08	126	5.07	235	15	12	50	-2.55868	47	280	4.6	110.434	1.73	2.87	1.52	0
967	2	168	80	28.3447	69	0	131	92	1	6	4.1	128	10.61	137	15	16	49	-2.44381	98	646	8.9	71.9915	1.28	4.15	1.54	0
968	2	172	78	26.3656	44	1	155	107	1	6.3	4.73	153	8.52	299	45.4	26.9	68	-2.82782	76	382.1	5.17	109.509	14.11	2.74	0.78	0
969	1	152	61	26.4024	75	1	160	89	1	12.7	4.93	153	6.19	144	16.7	22.9	71	-2.36511	64	292.3	5.86	86.5641	1.75	2.58	0.97	0
970	2	165	85	31.2213	71	1	136	86	0	9.1	3.77	121	6.91	229	29	21	79	-2.62567	194	437	10.6	31.332	1.54	2.24	0.93	0
971	2	173	73	24.3911	56	1	150	93	1	9	4.4	138	4.91	213	29.2	24.1	83	-3.04673	69	273.4	3.76	104.643	1.08	1.76	0.98	0
972	1	158	72	28.8415	42	1	186	93	1	9.2	4.68	139	7.71	197	18.3	18.2	65	-2.6102	44	360.1	4.68	120.148	15.81	2.95	0.75	1
973	2	172	62	20.9573	63	1	142	94	1	12.7	3.85	125	10.32	164	13	12	106	-2.4255	65	435	6.39	102.008	2.35	2.19	0.95	0
974	2	188	99	28.0104	29	0	158	111	1	10.5	5.24	152	6.33	239	12.7	15.6	85	-2.52202	59	503.9	3.88	129.769	1.38	2.53	0.7	0
975	2	170	74	25.6055	64	1	107	73	0	8.3	5.32	159	10.12	194	21.5	21.6	75	-2.82321	72	367	4.98	98.2922	1.44	2.54	0.83	0
976	1	152	61	26.4024	69	1	159	93	1	6.5	3.88	125	4.71	206	11.1	17.1	68	-2.49224	51	440.7	3.61	98.0254	1.93	3.68	1.03	0
977	2	170	56	19.3772	79	1	137	71	0	6	3.85	132	5.48	76	20	26	153	-3.0248	68	251	10	91.0963	0.65	2.45	1.67	0
978	2	172	62	20.9573	52	1	136	86	0	9.7	4.28	125	4.63	147	12.7	13.2	100	-2.38121	52	255.2	6.14	116.846	0.85	1.59	1.13	0
979	2	170	64	22.1453	36	1	108	77	0	6.3	4.7	135	6.78	290	26.1	18.6	73	-3.04497	71	255.3	4.65	117.485	1.28	2.54	0.93	0
980	1	160	55	21.4844	77	1	158	80	1	6.8	3.45	107	5.73	201	12	15	53	-2.73559	55	351	7.9	91.5857	1.75	3	1	0
981	2	172	73	24.6755	81	1	178	95	1	11.9	4.33	128	8.98	141	18	20	50	-2.9453	76	404	7.69	86.9983	1.43	3.08	0.79	0
982	1	158	66	26.4381	65	1	117	61	0	9.9	3.95	124	5.19	185	17	17	66	-2.94349	55	275	6.5	98.6824	2	2.62	1.15	0
983	2	175	77	25.1429	61	1	130	83	0	6.9	4.85	142	6.45	200	14.8	15.8	98	-2.6629	74	435.6	6.86	99.3182	1.15	2.01	0.83	1
984	2	178	100	31.5617	59	1	113	77	0	9.5	4.18	141	5.32	158	102.7	55.5	52	-2.68996	70	350	7.87	102.263	1.29	2.31	1.1	0
985	2	168	71	25.1559	45	1	136	98	1	11.5	3.79	123	4.98	186	8	19	54	-3.36106	44	444	5.7	128.36	42.2	0.83	1.08	1
986	2	173	72	24.0569	62	1	156	95	1	6.5	4.78	140	7.46	120	19	15	109	-2.47561	34	163	8.34	124.833	0.54	0.94	1.26	0
987	2	169	60	21.0077	65	1	134	80	0	6.7	4.43	137	4.03	158	27	31	67	-2.90874	69	209	7.52	98.9465	0.9	1.25	0.91	0
988	1	158	64	25.6369	70	1	157	79	1	10.4	4	129	5.97	156	57.7	42.7	63	-2.58988	43	281	5.19	101.507	1.55	2.5	1.08	0
989	2	168	77	27.2817	39	1	131	90	1	8.3	5	155	8.1	281	25	17	77	-3.20244	51	347	3.83	127.43	2.61	4.22	0.85	0
990	1	157	55	22.3133	51	1	136	88	0	6.7	3.88	122	4.51	108	30	21	106	-2.76832	38	329	7.04	117.694	10.67	0.83	0.6	0
991	2	174	58	19.1571	82	1	114	65	0	6	3.25	104	5.13	126	12	18	48	-2.53888	122	306	9.64	51.0514	1.17	2.29	0.73	0
992	2	172	78	26.3656	55	1	120	84	0	7	4.22	136	6.59	169	40.7	28.4	70	-2.63436	57	396.7	4.42	111.55	1.39	2.64	0.94	0
993	2	176	92	29.7004	54	1	123	94	1	7.2	4.3	136	5.59	198	13.2	10.5	65	-2.51907	124	428.1	7.31	59.5884	1.85	3.09	0.71	0
994	1	154	47	19.8178	76	1	196	101	1	6.7	3.87	119	4.52	133	10	11	49	-2.58176	71	418	7.02	75.9526	2.58	1.89	0.89	0
995	2	170	93	32.1799	41	1	178	112	1	10.5	5.2	158	6.03	162	125.3	89.1	106	-2.62899	49	329	4.79	127.385	3.25	3.81	1.2	0
996	2	165	79	29.0174	37	1	127	90	1	10.6	5.08	144	6.68	252	16	16	41	-2.65334	66	313	5.87	119.36	1.45	1.81	0.81	1
997	1	155	46.5	19.3548	85	1	145	69	1	8.1	3.56	109	4.91	143	13	19	61	-2.4579	46	220	4.3	90.975	0.95	1.93	1.18	0
998	2	174	75	24.7721	61	1	135	79	0	6.3	4.33	134	7.15	241	40	19	64	-3.817	69	296	3.3	101.439	0.91	1.04	0.97	0
999	2	167	69	24.7409	69	1	130	78	0	8.5	4.36	132	5.42	154	24.1	25.5	57	-2.58336	61	327.6	4.68	100.175	2.23	1.77	1.02	1
1000	1	161	61	23.533	78	1	119	77	0	6.9	4.42	125	4.14	134	19	22	65	-2.93221	76	426	5.1	69.1312	3.33	1.9	0.9	0
1001	2	175	85	27.7551	42	1	130	88	0	9.2	5.57	165	10.39	180	49	34	126	-3.21435	69	403	5.96	114.162	5.87	2.14	0.85	0
1002	1	157	58	23.5304	32	1	141	97	1	13	4.61	136	8.08	215	12.1	12.6	62	-2.65614	38	300.5	4.22	132.456	2.55	3.47	1.22	0
1003	2	169	56	19.6072	47	1	138	88	0	9.9	4.18	120	3.39	243	19.1	16.5	71	-1.94064	96	274.4	4.19	84.6154	0.62	1.86	0.78	0
1004	1	164	61	22.68	82	1	145	73	1	7.9	2.81	93	3.31	198	7.2	16	55	-2.09854	56	419.1	7.39	88.3968	3.63	2.94	0.88	1
1005	1	163	63	23.7118	61	1	129	71	0	7.4	3.87	119	4.61	110	25.1	22.4	113	-2.4343	48	259.1	4.4	104.542	0.89	1.81	1.04	0
1006	2	163	65	24.4646	55	1	142	96	1	6.5	4.99	140	8.17	213	22	18	103.8	-2.73268	88	344.3	4.13	89.3691	1.4	1.65	0.87	0
1007	2	167	70	25.0995	69	1	137	87	0	6.8	3.7	126	3.9	146	15.7	21	53	-2.60756	62	363.6	5.29	99.6842	0.87	1.46	1.34	0
1008	1	160	65	25.3906	51	1	163	104	1	11	3.79	129	7.91	183	18.3	18.9	60	-2.40866	61	341.5	4.91	105.007	4.57	3.2	1.07	0
1009	2	177	80	25.5354	61	2	136	91	1	7	4.88	142	6.92	170	19	16	81	-2.53102	54	347	6.66	109.233	1.76	1.37	0.42	0
1010	2	173	78	26.0617	43	1	123	73	0	6.1	4.71	150	10.97	279	25.6	19.4	48	-2.9055	88	331.9	4.81	96.2941	1.69	3.34	1.35	0
1011	2	174	84	27.7447	60	1	150	93	1	9.7	4.14	125	5.03	251	19.7	16.3	103	-2.31688	66	371.7	4.72	103.451	0.93	3.66	1.09	0
1012	1	155	53	22.0604	82	1	147	123	1	8.2	4.14	129	5.13	168	41.1	52.6	425	-2.41811	27	467	4.5	105.388	1.49	3.36	1.54	0
1013	2	182	123	37.1332	45	1	160	97	1	7.5	4.75	145	6.38	169	69	65	70	-3.00134	53	387	6.47	121.345	3.28	3.3	0.82	1
1014	2	175	67	21.8776	57	1	116	84	0	13.6	4.89	142	7.52	158	27	13	142	-3.06402	116	363	8.8	63.36	18.3	2.8	0.65	1
1015	1	160	71	27.7344	58	1	189	100	1	8.8	3.81	114	6.21	188	35.9	23.9	85	-2.69707	42	253.6	3.67	109.994	1.76	3.04	0.99	0
1016	2	160	61	23.8281	65	1	111	76	0	10.3	4.79	141	4.52	218	20	20	61	-2.8433	49	262	6.5	109.722	1.1	3.1	1.06	0
1017	1	155	78	32.4662	53	1	156	83	1	7.2	4.36	128	16.26	434	12.1	11	85	-1.91146	38	369.8	3.11	116.239	1.29	1.92	0.67	0
1018	2	172	75	25.3515	71	1	101	63	0	9.2	5.02	160	4.88	139	15	12	70	-3.05697	64	464	8.3	97.5125	2.59	2.97	1.07	0
1019	2	176	77	24.858	56	1	145	98	1	8.4	4.8	161	5.6	176	22.7	15.2	87	-2.61341	54	200.6	5.8	112.683	1.19	2.91	1.72	1
1020	2	168	68	24.093	53	1	147	90	1	10	4.96	146	4.57	154	17.5	18.4	46	-2.7092	60	383.3	5.28	111.21	4.31	2.18	0.83	0
1021	1	150	54	24	74	1	149	76	1	8.9	3.61	103	7.17	134	11	17	46	-2.60311	73	359	6.84	74.3819	2.12	2.08	1.17	1
1022	2	165	75	27.5482	69	1	124	70	0	5.7	4.41	137	4.1	130	11	13	53	-2.27492	65	389	6.7	98.2718	1.34	1.34	1.28	0
1023	2	150	53	23.5556	78	1	126	84	0	6.9	3.33	85	5.95	263	31.2	34.7	144	-2.655	149	343.9	8.59	41.1737	1.78	4.15	1.16	0
1024	1	163	63	23.7118	69	1	140	79	1	13.8	3.92	120	4.39	82	14	14	69	-2.63439	47	291	5.72	99.9741	1.25	2.25	0.78	0
1025	2	178	87	27.4587	65	1	150	80	1	6.3	2.51	80	7.28	93	9	18	119	-1.19556	152	192	6.3	43.5857	1	1.11	0.51	0
1026	2	170	95	32.872	32	0	162	127	1	11.6	5.01	149	5.23	240	57.3	38	42	-2.90705	89	337.2	6.43	101.724	1.86	2.43	0.92	0
1027	2	172	62	20.9573	38	1	119	76	0	11.3	5.08	156	6.02	157	9	8	63	-2.9047	65	251	5.6	119.168	2.05	3.6	1.06	0
1028	2	163	60	22.5827	43	1	140	87	1	11	4.75	144	6.14	164	14	15	65	-2.44851	58	300	5.17	119.564	1.13	3.22	0.85	0
1029	2	170	68	23.5294	54	1	105	63	0	6.4	3.64	109	4.89	100	19.1	20	62	-2.75344	108	655.7	13.97	70.333	2.34	1.55	0.72	0
1030	1	159	62	24.5243	60	1	145	71	1	10.1	4.69	143	4.43	78	33	25	130	-3.30444	41	222	4.6	109.268	2.3	3.57	1.22	0
1031	2	165	50	18.3655	54	1	135	86	0	10.8	3.24	94	5.15	254	22	14	133	-2.52966	54	205	8.7	114.093	1.76	2.44	1.41	1
1032	2	170	77	26.6436	88	1	103	60	0	10.6	3.66	110	3.91	122	25.3	21.3	58	-2.485	75	255.3	5.59	83.6259	0.86	0.89	0.91	0
1033	1	165	55	20.202	57	1	111	60	0	6	3.88	112	4.5	205	13.7	17.9	81	-2.78838	39	172.7	4.11	112.675	0.81	2.42	1.08	0
1034	2	176	90	29.0548	67	1	150	98	1	7.1	3.5	106	6.65	161	8.8	11.1	44	-2.33834	92	361.8	7.54	78.6338	1.18	3.81	1.3	0
1035	2	175	78	25.4694	62	1	160	100	1	7.4	5.14	157	6.52	198	14.3	18.1	92	-2.45382	89	341	5.8	84.4096	2.05	2.62	0.99	0
1036	2	162	80	30.4832	72	1	147	97	1	8.2	4.32	134	5.2	229	15.1	22.4	55	-2.1463	104	441.3	5.07	65.7975	2.42	2.32	0.68	0
1037	2	169	63	22.0581	46	1	137	84	0	8.1	4.73	141	8.73	164	78.9	45.2	80	-2.52824	65	352.1	6.46	113.384	1.09	2.41	0.87	1
1038	2	167	60	21.5139	87	1	123	73	0	5.7	3.57	115	7.02	125	56	21	133	-2.70154	133	380	9.35	44.6182	1.14	2.12	0.84	0
1039	2	150	73	32.4444	86	1	174	80	1	6.1	4.11	132	7.01	145	12	21	73	-3.20058	82	512	14.3	80.2156	1.76	2.37	0.99	0
1040	2	172	71	23.9995	46	1	156	97	1	9.3	4.84	147	5.2	140	11.5	11.2	85	-2.6881	93	457.6	6.43	88.4497	2.09	2.39	1	0
1041	1	165	67	24.6097	71	1	131	83	0	9.4	4.08	120	6.99	202	12	14	91	-3.48804	72	406	7	77.0475	3.16	2.32	0.78	0
1042	1	158	70	28.0404	61	1	150	84	1	9.6	4.29	130	4.09	123	27	24	149	-2.88156	39	202	4.03	109.907	1.97	4	1.29	0
1043	1	158	52	20.83	60	1	127	73	0	7.9	4.26	129	4.45	222	14	19	53	-2.51902	34	257	5.19	114.31	0.97	3.53	1.48	0
1044	2	169	78.3	27.415	45	1	154	92	1	10.1	5.05	145	7.47	177	35	20	79	-2.68401	54	348	4.66	120.662	16.01	1.39	1.12	0
1045	2	162	75	28.578	40	1	116	76	0	9.7	4.71	150	6.75	177	103.1	56.5	125	-2.54939	58	265.6	6.23	121.816	1.35	2.09	1.08	0
1046	2	170	62	21.4533	68	1	132	59	0	7.4	4.04	133	3.92	116	18.9	17.8	58	-2.78207	64	254.5	7.71	99.349	0.67	1.05	0.78	0
1047	1	165	61	22.4059	52	1	125	77	0	7.5	3.87	113	5.44	92	10.1	31.1	77	-2.298	48	261.4	5.61	110.561	1.45	1.87	1.42	0
1048	1	168	63	22.3214	62	1	141	80	1	5.6	4.13	127	4.25	148	17.1	24.8	97	-2.67604	56	218.5	7.39	100.105	0.49	0.95	1.73	1
1049	2	175	80	26.1224	81	2	163	78	1	6.6	4.02	133	7.28	164	18	17	54	-3.25282	74	319	7.1	87.7018	0.96	1.59	1.06	0
1050	2	166	70	25.4028	76	1	112	84	0	8.7	3.89	130	4.96	180	8.5	9	68	-2.51626	174	361.7	14.69	34.6088	4.91	1.68	0.74	0
1051	2	176	71	22.921	60	1	156	90	1	6.2	5.27	126	5.81	246	17	20	99	-2.89651	63	275	3.25	104.915	1.07	2.51	0.91	0
1052	1	155	60	24.974	45	1	119	84	0	11.6	3.75	112	8.51	116	14	12	108	-2.22558	41	195	5.36	119.952	2.02	3.11	0.54	0
1053	2	160	60	23.4375	80	1	118	73	0	11.3	2.38	73	8.44	194	9	11	51	-1.8629	52	219	8.48	98.1713	1.1	1.85	0.74	0
1054	2	163	65	24.4646	57	1	134	85	0	6.9	4.69	125	3.39	206	13.4	20.8	85	-2.5114	70	238.3	7.5	103.543	0.64	2	1.26	0
1055	2	174	84	27.7447	67	1	139	81	0	10.1	4.5	143	4.89	145	14	16	65	-2.73949	60	265	6.66	101.936	0.69	1.6	0.96	1
1056	2	171	72	24.623	85	1	134	70	0	8.6	3.2	82	4.44	104	13	15	86	-2.49438	105	502	7.01	59.9942	1.94	2.26	0.86	0
1057	2	172	55	18.5911	53	1	122	74	0	10.8	5.03	158	5.23	172	35.5	16	86	-2.67736	64	234.1	5.85	109.063	0.92	3.1	1.67	0
1058	2	171	75	25.6489	41	1	117	81	0	6.5	4.23	141	7.02	206	13.7	20.2	93	-2.60426	65	340.1	6.42	116.965	2.04	2.14	1.01	0
1059	1	160	50	19.5312	78	2	117	60	0	7.3	2.66	84	5.61	163	10.9	14.4	76	-3.09371	62	274	6.8	88.2634	1.36	2.14	0.84	0
1060	2	173	72	24.0569	80	1	143	85	1	7.2	4.89	148	5.69	165	14	15	78	-2.63319	64	350	6.19	92.2043	1.12	2.03	0.98	0
1061	2	180	92	28.3951	57	1	136	89	0	6.8	3.74	121	5.3	136	23	20	75	-2.984	70	466	4.64	103.543	2.58	1.62	0.94	1
1062	2	168	75	26.5731	66	1	136	86	0	7.1	5.12	150	7.01	138	22.8	26.1	73	-2.46354	66	270.8	7.62	99.662	1.04	1.56	1.02	0
1063	1	160	71	27.7344	55	1	144	98	1	8.4	4.48	133	5.24	198	19.5	21.1	82	-2.49478	42	239.7	4.27	112.066	1.55	3.33	1.29	1
1064	2	175	72	23.5102	61	1	121	89	0	6	4.9	143	5.97	235	30.3	23.5	67	-2.44997	67	163.2	7.02	102.344	0.99	2.58	1.16	0
1065	2	167	60	21.5139	60	1	129	75	0	8	4.44	135	6.7	179	15	29	90	-2.6983	72	220	7	100.768	1.31	2.83	0.88	0
1066	1	159	55	21.7555	79	1	118	80	0	7	3.35	110	6.27	152	18	16	55	-2.57288	42	450	5.31	96.5272	1.51	1.64	0.84	0
1067	2	164	70	26.0262	83	1	136	71	0	6.9	3.97	122	6.49	96	37	39	72	-2.61785	78	359	5.1	85.2515	0.58	1.19	1.06	0
1068	2	170	72	24.9135	59	1	156	86	1	8.7	5.71	154	7.05	201	15	12	72	-2.88399	73	660	9.04	100.975	6.89	2	0.73	0
1069	2	165	67	24.6097	64	1	107	55	0	8.2	3.82	108	10.08	191	14	13	90	-2.40663	101	408	25.09	71.6262	3.03	1.98	0.72	0
1070	2	171	61	20.8611	59	1	126	71	0	5.5	4.45	138	5.3	117	15	16	66	-2.73558	55	340	5.1	109.989	1.53	3.83	1.39	0
1071	2	162	63	24.0055	80	1	116	62	0	7.5	3.72	118	8.83	154	22.7	31.8	110.6	-3.04666	118.7	415.9	10.23	53.4196	1.96	2.38	0.75	1
1072	1	164	69	25.6544	69	1	118	76	0	7	4.13	126	5.11	216	15.8	15.8	58	-2.70348	53	293.2	4.82	97.1208	1.42	1.91	1.23	0
1073	1	158	55.5	22.232	65	1	130	82	0	8.4	4.68	144	6.57	216	49	33	97	-3.27678	38	305	3.83	107.88	5.6	3.72	1.19	0
1074	2	170	74.5	25.7785	63	1	130	94	1	6.7	4.54	124	6.85	240	17	17	58	-2.91799	76	259	5.33	97.3036	2.23	3.05	0.71	1
1075	1	155	70	29.1363	66	1	165	85	1	10.5	4.16	125	7.57	161	16	15	65	-2.62792	127	444	12.33	40.2252	1.68	3.12	0.94	0
1076	2	165	65	23.8751	75	1	154	84	1	8.3	3.43	112	5.03	207	12	12	179	-3.05292	95	461	6.97	71.991	0.67	1.46	1.1	0
1077	1	148	52	23.74	72	1	145	72	1	7.9	4.3	130	6.46	225	13.2	15.7	72	-2.70548	46	354.9	7.02	98.636	1.79	3.65	1.29	0
1078	1	170	82	28.3737	72	1	127	72	0	7.5	4.35	126	5.8	452	15	16	95	-2.38794	42	316.3	3.68	100.822	1.82	3.69	0.87	1
1079	1	162	107	40.7712	53	1	124	73	0	5.8	2.68	67	2.11	69	17.1	23	76	-2.45209	69	420.5	4.87	90.6895	1.43	2.81	1.08	0
1080	2	178	94	29.668	55	1	124	87	0	7	4.39	137	7.67	186	15	14	92	-3.23736	100	446	6.94	76.6596	2.68	2.24	0.81	0
1081	2	172	75	25.3515	36	1	167	114	1	8.5	4.67	148	6.5	193	36	20	83	-3.12381	65	442	4.52	120.66	2.74	2.13	0.86	0
1082	1	157	62	25.1532	75	1	129	77	0	6.6	3.85	121	7.09	171	14	21	67	-2.88568	67	356	6.6	81.9339	1.29	3.09	1.12	0
1083	1	153	59	25.204	72	1	148	88	1	7.6	3.97	117	7.32	286	15.6	17.6	98	-2.64724	58	288.6	5.8	93.2768	1.46	3.2	1.37	0
1084	2	175	71	23.1837	49	1	125	79	0	5.8	5.09	153	5.74	210	30	22.4	95	-2.9538	63	375.6	6.7	112.343	2.92	2.99	1.1	0
1085	2	161	73	28.1625	34	1	144	94	1	5.8	4.82	150	5.12	200	12.7	17.1	64	-2.8883	69	391.5	5.19	119.986	0.97	2.57	0.99	0
1086	2	169	62	21.7079	81	1	150	79	1	8.8	4.21	127	8.68	171	61.5	44.6	81	-2.05048	46	316	6.26	101.243	1.33	1.9	0.75	1
1087	1	156	64	26.2985	70	1	190	105	1	13.5	5.11	139	7.29	236	20.6	16.6	96	-2.37398	48	245.9	4.47	98.8514	2.13	3.32	1.25	0
1088	1	160	70	27.3437	65	1	113	69	0	7.7	4.04	125	6.35	147	67.2	62.6	99	-2.85124	55	416.5	5.55	98.6824	1.78	2.34	0.98	1
1089	2	160	60	23.4375	48	1	158	103	1	11.2	5.02	148	6.55	187	13	15	56	-3.2994	46	241	4.8	124.307	1.5	2.83	1.25	0
1090	1	158	54	21.6311	68	1	118	84	0	6.4	4.8	137	8.36	235	23	27.2	83.7	-3.20886	48.8	208.6	6.95	99.6907	2.26	1.32	0.87	0
1091	2	160	60	23.4375	58	1	123	90	1	6.7	4.86	158	5.16	178	15	17	79	-2.98082	78	266	7.31	99.5926	1.65	3.11	0.85	0
1092	2	172	63	21.2953	47	2	142	79	1	6.1	4.77	139	13.38	372	8	11.5	90	-2.3745	68	389.1	10.52	111.156	1.18	2.94	1.25	0
1093	2	173	70	23.3887	51	1	128	88	0	11.4	5.09	155	5.49	172	22.1	16.2	56	-2.58206	51	244.8	5.85	118.266	2.04	2.09	0.92	0
1094	2	178	85	26.8274	49	1	138	99	1	9.8	5.32	164	6.58	211	61.5	45.2	74	-2.66261	66	345.4	5.7	110.776	2.3	2.13	1.07	0
1095	1	160	52	20.3125	70	1	155	90	1	7.1	4.26	125	3.83	154	16	22	56	-2.66754	58	291	6.16	94.4443	0.63	3.65	1.54	0
1096	2	168	60	21.2585	92	1	173	80	1	8.1	3.55	100	4	141	12	15	61	-2.52386	115	373	11.68	51.4982	1.04	2.12	1.23	0
1097	1	150	51	22.6667	83	1	135	70	0	9.3	3.45	109	7.6	167	9	12	143	-3.29696	148	459	15.31	30.1184	1.12	2.85	0.91	0
1098	2	173	90	30.0712	52	1	141	98	1	9.7	4.68	140	7.47	221	48.5	31.8	77	-2.69568	64	294.6	6.1	109.744	4.81	4.73	1.31	0
1099	2	175	78	25.4694	55	1	120	79	0	5.6	4.59	150	7.04	187	20.7	23.9	57	-2.91356	70	470.2	5.06	104.839	2.23	1.75	1.12	0
1100	2	171	82	28.0428	75	1	147	74	1	4.3	2.31	77	2.37	97	11.2	14.8	68	-2.24672	77	384	7.46	89.9503	0.97	0.76	0.69	0
1101	2	166	62	22.4996	62	1	150	69	1	6.7	3.92	116	7.71	238	19	21	85	-2.32247	96	362	9.67	77.0787	1.04	2.81	0.48	0
1102	2	178	77	24.3025	53	1	134	84	0	5.6	4.48	135	6.29	228	32	26.8	54	-2.9533	64	501.2	4.23	109.063	1.67	2.22	0.89	0
1103	2	175	86	28.0816	56	1	119	85	0	8.2	5.24	159	6.4	166	29	22	113	-2.8885	76	304	5.8	101.633	1.99	4	1.16	0
1104	2	169	65.5	22.9334	56	1	131	96	1	7.6	4.74	156	7.33	161	29	21	61	-3.01806	66	327	8.09	106.057	2.14	3.13	0.61	0
1105	1	160	58	22.6562	52	1	147	88	1	5.7	3.76	104	3.2	70	19.1	17.7	80	-2.68123	36	308.4	4.49	118.498	1.28	2.45	1.06	0
1106	2	164	70	26.0262	36	1	120	81	0	5.8	4.36	128	8.52	281	53	25	80	-3.42102	74	410	6.78	116.026	0.82	1.4	0.71	0
1107	1	152	75	32.4619	74	1	150	60	1	11.4	4.97	142	8.6	161	10	10	133	-2.43423	36	290	4.68	103.345	3.66	3.78	1.02	0
1108	1	165	62	22.7732	54	1	132	92	1	7	4.31	125	5.92	178	10.3	16.4	67	-2.77552	49	318.7	4	108.653	2	2.36	1.08	1
1109	1	150	85	37.7778	77	1	143	92	1	9.4	3.75	109	6.87	250	14	27	80	-1.21986	60	342	9.68	89.6851	1.99	3.6	2.28	0
1110	2	160	64	25	78	1	145	80	1	5.9	3.74	111	5.65	225	9	18	123	-2.86766	48	185	3.2	101.832	0.46	1.42	1.69	0
1111	2	172	71	23.9995	55	1	127	88	0	9.6	5.19	162	6.64	204	17.9	15.9	66	-2.5959	57	253.5	8.83	111.55	1.28	2.49	0.73	0
1112	1	155	50	20.8117	68	1	113	77	0	7.9	3.81	112	3.3	160	12.4	18.5	73	-2.37944	63	253.8	6.89	92.1408	0.45	2.86	1.6	0
1113	2	168	54	19.1327	58	1	142	80	1	10.4	4.24	119	3.47	181	43.7	30.2	130	-1.8412	44	254.7	6.21	118.391	0.8	1.74	0.6	1
1114	1	160	66	25.7812	61	1	117	72	0	10.1	4.17	116	4.86	292	35	28	67	-3.08264	50	328	7.72	103.519	4.01	2.34	0.81	0
1115	1	162	89	33.9125	27	0	130	86	0	6.8	4.74	136	13.56	344	42	19	83	-3.12273	45	481	4.75	131.184	1.85	3.05	0.76	1
1116	2	170	60	20.7612	75	1	131	68	0	6.4	4.72	131	5.45	130	18	19	55	-2.86902	85	207	6.7	82.2704	1.7	3.63	1.26	0
1117	2	163	80	30.1103	66	1	169	88	1	8.6	3.19	93	7.57	225	12.2	14.9	48	-1.84244	129	419.6	7.87	52.7409	2.26	2.87	1.01	0
1118	1	168	70	24.8016	58	1	116	71	0	8.3	3.92	116	4.08	102	26.1	22.1	66	-2.31852	51	301.3	4.82	104.966	1.11	2.71	1.1	0
1119	1	163	65	24.4646	69	1	148	88	1	6.2	3.99	119	3.16	170	14	19	39	-2.29928	39	216	5.47	104.572	1.57	2.35	1.1	0
1120	1	140	50	25.5102	73	1	112	57	0	6.4	3.71	111	4.05	246	13	19	104	-2.40326	43	182	5.9	99.6307	0.8	1.39	1.27	0
1121	2	178	82	25.8806	65	1	137	84	0	7.9	4.73	138	9.38	168	23	20	70	-2.29624	97	351	6.48	74.7189	0.79	1.24	0.65	0
1122	1	165	55	20.202	59	1	120	83	0	6.8	4.14	119	4.4	124	22	20	116	-3.00924	47	313	5.93	106.389	6.54	2.85	0.89	1
1123	2	165	62	22.7732	60	1	109	84	0	5.5	4.4	145	5.5	146	17	24	60	-3.28726	110	399	6.41	66.2812	0.79	2.18	1.52	0
1124	2	170	63	21.7993	77	1	147	79	1	6.6	3.63	103	7.88	44	5	18.3	54	-1.69285	109	398	7.18	60.2883	1.29	1.98	1.09	1
1125	2	162	50	19.052	77	1	126	73	0	8	4.17	133	3.8	152	10.3	20.2	49	-2.87623	55	233.9	8.54	98.3402	1.45	4.03	1.39	0
1126	1	160	59	23.0469	45	1	115	78	0	6.3	4.21	122	5.98	316	9	13	71	-2.44254	59	217	5.35	109.878	1.52	1.93	0.75	0
1127	2	174	62.5	20.6434	60	1	129	92	1	8.6	3.58	109	5.14	163	15	18	71	-2.56501	89	335	7.44	85.466	0.98	1.37	0.89	0
1128	2	178	68	21.4619	57	1	148	95	1	8	3.76	121	4.43	94	51	33	104	-2.87239	99	429	9.6	76.6306	2.33	1.74	1.03	0
1129	2	174	80	26.4236	71	1	127	71	0	9.3	3.78	119	3.88	175	32	22	59	-1.98065	72	234	6.19	94.1049	1.14	2.45	0.59	0
1130	1	157	65	26.3702	74	2	155	71	1	8.7	3.77	117	1.82	36	19	27	89	-1.7803	38	167	4.53	102.007	0.73	1.83	1.03	0
1131	2	177	74	23.6203	60	1	124	84	0	6.3	4.6	139	8.19	308	13.3	12.8	68	-2.65523	87	388.3	4.02	87.8291	2.36	2.93	1.03	0
1132	2	165	60	22.0386	70	1	178	93	1	6.2	4.69	145	8.81	247	9	15	154	-2.70014	163	372	10.9	38.8532	0.73	2.64	0.85	0
1133	1	153	53	22.6409	57	1	115	79	0	8.4	4.07	121	4.54	90	24.8	21.9	113	-2.2804	66	399.4	7.79	93.308	0.89	1.92	0.65	0
1134	2	175	78	25.4694	51	1	113	72	0	5.6	4.19	132	4.32	167	25	17	58	-3.39978	59	333	4.67	113.175	1.52	1.61	1.02	0
1135	2	171	95	32.4886	55	1	163	99	1	8.3	4.59	135	5.03	137	12.2	16.2	76	-2.72142	69	387.6	6.06	105.296	1.36	3.19	1.04	0
1136	1	157	60	24.3418	82	1	177	83	1	10.2	4.38	130	6.35	193	10	12	113	-2.81286	53	318	9.96	89.5776	2.19	3.64	0.88	0
1137	2	160	54.5	21.2891	55	1	98	68	0	6.9	3.4	109	6.22	204	17	11	48	-2.4978	32	178	4.94	132.797	1.11	0.89	0.76	0
1138	2	166	73	26.4915	75	1	149	84	1	7	4.68	147	4.97	160	18	23.8	70	-3.16649	58	331	4.95	97.9867	1.11	1.87	1.38	0
1139	1	164	120	44.6163	54	1	149	97	1	7.5	4.39	130	8.07	167	26.9	23.6	77	-2.23579	71	501	7.16	87.0893	2.9	2.13	0.97	0
1140	1	164	64	23.7954	53	1	145	79	1	8.7	2.87	90	6.74	262	20	21	103	-2.29642	90	495.2	8.6	65.9303	0.86	2.68	1.04	0
1141	2	168	69	24.4473	34	1	138	88	0	15.9	6.65	147	5.49	170	17	19	84	-2.23203	77	332.1	3.5	116.076	3.35	3.64	1.08	1
1142	1	158	59	23.634	54	1	120	68	0	8.9	4.02	123	7.15	224	23	18	81	-3.05182	55	260	9.52	105.67	1.2	1.46	0.62	0
1143	1	150	53	23.5556	82	1	116	77	0	9.2	3.8	111	8.52	240	26	23	51	-2.36101	87	523	11.14	57.3355	1.5	3.35	0.68	0
1144	1	157	70	28.3987	52	1	122	79	0	6.4	3.65	121	4.39	90	10.4	19.5	59	-2.1745	69	317.6	6.34	91.2553	1.15	2.34	1	0
1145	1	150	62	27.5556	72	1	141	77	1	7.9	3.81	118	5.77	245	19.9	25.4	41	-2.97023	121	285.9	9.54	41.069	1.6	2.09	1.02	0
1146	2	180	97	29.9383	26	1	117	82	0	9.5	5.02	151	7.78	187	44.5	28.1	51.3	-2.32978	77.8	561.6	3.48	121.618	5.15	2.61	0.53	0
1147	2	166	80	29.0318	52	1	150	94	1	9.1	3.88	125	4.66	132	18.1	18.3	53	-2.63194	67	398.1	6.97	108.236	2.64	2.53	1	1
1148	2	163	57	21.4536	68	1	135	75	0	6.6	3.89	118	8.43	201	21.7	21.4	69	-2.58649	67	330.4	7.22	97.984	1	1.47	0.98	0
1149	2	168	66	23.3844	59	1	113	74	0	7.2	5.07	149	5.76	278	23.8	16.9	56	-2.50311	76	374.7	6.1	99.7546	2.15	2.91	0.91	1
1150	2	169	74	25.9095	60	1	118	76	0	7.4	3.93	119	7.52	197	27.8	22	100	-2.61514	173	663.4	11.62	38.4952	1.77	2.79	0.73	0
1151	2	173	83	27.7323	56	1	134	85	0	10.3	4.31	133	6.22	207	21	15	101	-3.25102	74	355	7.5	102.455	3.72	3.37	1.04	0
1152	2	169	63	22.0581	55	2	136	83	0	8.8	4.66	138	4.98	227	9	18	59	-2.91244	73	178	4.21	103.519	0.65	2.24	1.2	0
1153	2	166	57.5	20.8666	41	1	142	92	1	7.8	5.31	161	5.93	208	32.7	24.4	81	-2.90374	68	431.4	6.86	115.382	2.21	3.1	1.26	0
1154	2	170	83	28.7197	71	1	137	76	0	8.1	4.35	134	7.95	227	29	27	89	-3.23488	97	467	7.05	71.9821	2.14	2.19	0.98	0
1155	1	164	66	24.539	39	1	111	79	0	10	4.6	138	5.23	179	47	30	112	-2.56742	38	203	4.45	126.813	1.36	2.7	0.95	0
1156	2	160	62	24.2187	60	1	138	93	1	8.9	4.63	136	5.89	184	15	15.9	36	-2.94809	80	232.5	8.16	97.1301	1.67	3.24	1.18	0
1157	2	172	89	30.0838	45	1	143	93	1	7.7	5.09	157	6.3	266	50.3	19.1	110	-3.17638	61	374.1	4.86	116.301	1.41	2.85	0.82	0
1158	2	185	90	26.2966	34	1	123	94	1	9.8	5.98	169	9.27	240	10.6	11.3	76	-1.97099	84	403.2	3.8	107.684	1.5	5.61	1.55	1
1159	2	178	79	24.9337	61	1	93	69	0	6.1	4.9	152	5.66	189	68.6	64.6	74	-1.71742	70	300.3	5.96	100.999	2.27	3.57	0.91	0
1160	2	171	78	26.6749	39	1	126	97	1	6.4	5.12	142	7.55	248	13.2	17.5	75	-2.79214	74	440.6	4.46	113.881	0.93	2.45	0.89	0
1161	1	154	45	18.9745	83	1	148	78	1	8.8	3.4	113	6.87	169	12	17	110	-2.64248	118	369	9.49	39.5264	1.32	0.93	0.58	0
1162	1	135	36	19.7531	33	0	159	103	1	10.5	4.91	142	4.73	156	24	23.2	198	-2.94752	31	162.6	4.01	138.255	0.96	2.24	0.92	0
1163	2	170	72	24.9135	54	1	136	84	0	9	5.12	152	6.53	170	44	27	77	-2.69011	59	317	6.01	111.083	20.9	0.74	0.54	0
1164	2	165	63	23.1405	61	1	124	72	0	6.9	4.21	132	9.06	205	11	21	64	-2.77886	63	339	5.11	104.264	1.01	1.23	1.24	0
1165	2	164	67	24.9108	57	1	114	87	0	11	4.43	139	6.26	146	23	20	109	-2.38593	69	317.3	6.7	103.994	4.24	2.58	0.83	0
1166	1	152	49	21.2084	61	1	110	73	0	8.6	3.77	115	4.97	116	22	19	83	-2.75336	53	278.3	4.4	102.075	1.05	2.49	1.34	0
1167	2	170	75	25.9516	44	1	130	92	1	8.9	4.53	136	5.94	249	15	17.4	70	-2.86052	55	341	6.25	120.744	3.52	1.95	0.78	0
1168	2	173	87.5	29.2359	59	1	133	82	0	6.7	5.06	153	9.23	315	21	19	112	-3.20053	72	344	4.38	101.397	1.92	2.28	0.93	0
1169	2	176	92	29.7004	33	1	148	91	1	7.3	6.84	125	7.18	225	41	29	61	-2.68904	60	397	2.04	125.94	1.01	1.81	0.7	1
1170	2	160	62	24.2187	52	1	156	99	1	9	5.03	154	7.53	183	11	14	81	-2.85798	53	311	7.64	116.175	15.84	1.35	0.47	0
1171	1	155	58	24.1415	54	1	124	79	0	14.7	4.76	138	4.12	207	110	85	99	-2.59448	43	485	5.59	112.128	4.22	1.74	0.71	0
1172	1	161	49	18.9036	54	1	108	71	0	6.2	3.79	112	4.94	227	12	16	65	-2.46621	42	354	6.43	112.765	0.87	2.17	1.1	0
1173	2	164	62	23.0518	68	1	112	64	0	6.8	5.26	165	10.74	190	23	16	88	-2.95884	90	452	5.8	80.2348	0.95	1.12	0.9	0
1174	2	166	63	22.8625	58	1	149	94	1	8.2	4.51	132	6.01	141	9.2	13.3	67	-2.52699	89	256.6	9.82	86.5358	1.84	2.21	1.02	0
1175	2	173	63	21.0498	51	1	97	72	0	11	4.68	145	6.73	110	50.9	43.5	112	-2.38626	67	271.8	8.75	108.911	1.34	2.02	1	0
1176	1	160	56	21.875	76	1	127	81	0	10	3.89	111	4.59	196	19	25	94	-2.83844	41	221	4.63	98.9179	5.84	1.05	0.44	0
1177	1	150	63	28	65	1	146	76	1	6.9	3.46	101	3.84	140	8	15	53	-3.05917	95	513	10.1	57.345	1.47	1.83	0.79	0
1178	1	155	53	22.0604	80	1	154	76	1	6.2	3.36	102	5.71	236	8	14	43	-3.07738	53	234	5.2	90.6988	0.81	2.04	2.26	0
1179	1	160	67	26.1719	59	1	133	85	0	6.9	3.02	104	4.24	138	17	22	88	-2.60466	66	391	7.07	92.1546	2.04	4.27	0.75	1
1180	2	177	86	27.4506	58	1	134	74	0	7.7	4.76	144	4.73	168	20.2	22.5	61	-2.40822	74	293.9	5.45	101.189	2.66	2.25	0.97	1
1181	1	158	56	22.4323	64	1	151	89	1	7	4.66	133	3.87	261	27	26	84	-2.58892	63	195	6.52	94.4618	2.17	1.94	1.07	0
1182	2	185	115	33.6012	54	1	147	97	1	7.9	5.7	163	6.85	147	8	9	71	-3.29034	60	370	7.32	110.52	1.94	1.07	0.69	0
1183	2	187	105	30.0266	31	1	126	82	0	12.3	4.86	151	6.97	185	30.8	15.9	90	-2.39241	82	459.7	5.74	112.931	2.34	2.73	0.88	0
1184	2	168	75	26.5731	48	1	123	75	0	9	5.43	163	4.11	175	18.4	16.3	45	-2.79378	78	364.4	5.2	105.983	2.55	1.94	0.97	0
1185	2	172	106	35.8302	31	1	139	89	0	10.1	4.83	150	10.13	171	92	51	115	-2.77751	59	453	5.56	128.165	6	1.73	0.46	0
1186	2	175	75	24.4898	59	1	151	78	1	6.8	3.12	99	8.76	170	14	17	74	-3.11017	185	516	16.84	35.7402	2.69	2.5	0.65	0
1187	1	150	60	26.6667	80	1	117	65	0	8.7	3.81	113	4.97	269	65	56	170	-3.07732	55	217	7	89.8927	1.47	1.75	0.97	0
1188	1	160	65	25.3906	48	1	126	74	0	5.7	3.68	116	4.05	147	10	16	53	-2.6473	57	153	7.65	108.747	0.73	2.15	1.03	0
1189	2	152	61	26.4024	76	1	152	85	1	6.6	4.26	135	6.44	193	10.6	17.6	71	-2.52699	50	333.4	3.95	101.843	0.93	2.21	0.89	0
1190	2	165	58	21.3039	67	1	113	77	0	7.4	4.48	143	4.57	98	23.6	22.5	79	-3.16802	86	310.6	8.51	85.2622	0.94	1.81	1.11	1
1191	2	168	67	23.7387	63	1	120	82	0	6.5	4.3	123	4.53	189	6.1	12.4	68	-2.60846	81	430.5	4.29	93.924	4.74	3.23	0.9	0
1192	1	160	49	19.1406	53	1	142	91	1	8.2	3.95	122	5.04	149	27.7	25.6	82	-2.72391	41	427.6	5.83	114.13	9.27	2.69	0.74	0
1193	1	163	60	22.5827	79	1	130	73	0	10.4	4.28	123	7.57	226	12	13	57	-2.39326	47	321	5.13	93.9458	1.91	1.99	0.52	0
1194	1	165	65	23.8751	55	1	129	87	0	6.7	4.44	133	5.12	186	44	33	77	-3.00759	56	333	4.24	104.56	1.78	2.66	0.78	0
1195	2	175	75	24.4898	68	1	137	95	1	9	4.76	141	6.16	176	22	17	133	-2.98088	99	297	9.3	71.5635	1.48	0.85	0.71	0
1196	1	162	65	24.7676	70	2	148	93	1	6.2	4.17	127	5.44	219	13	18	97	-3.36186	104	372	8.11	49.8676	1.51	2.24	1.03	0
1197	2	173	63	21.0498	68	1	141	82	1	7.5	4.3	134	7.41	238	41	24	87	-3.09724	74	340	5.8	95.0871	0.53	1.34	1.03	0
1198	1	152	65	28.1337	54	1	129	80	0	11.2	4.43	130	4.62	236	19	15	80	-2.93074	36	189	2.95	117.033	2.35	1.7	1.1	1
1199	2	175	75	24.4898	66	1	130	100	1	7.9	4.91	152	8.18	196	17	15	117	-3.32321	97	327	5	74.2556	1.55	2.36	1.06	0
1200	2	170	71	24.5675	47	1	145	95	1	7.6	4.74	148	3.4	154	22.6	24	69	-2.802	74	319.3	4.46	108.353	4.36	3.96	1.13	0
1201	2	165	86	31.5886	41	1	140	90	1	7.5	4.26	142	7.47	225	74	41	113	-3.00374	44	375	5.51	131.593	17.91	1.19	0.64	1
1202	2	165	70	25.7117	58	1	170	116	1	8.3	4.54	141	6.28	211	16	16	59	-2.66786	70	373	9.36	102.901	1.16	2.39	1.19	0
1203	2	170	75	25.9516	50	1	117	69	0	8	4.74	150	8.87	221	24	18	74	-3.02094	60	331	5.6	113.304	1.69	1.66	0.66	0
1204	2	177	85	27.1314	58	2	139	84	0	7.6	4.59	137	5.14	237	8.7	7.4	67	-2.62642	44	265.1	4.34	118.391	1.51	3.11	0.73	1
1205	2	168	70	24.8016	69	1	137	84	0	7.8	3.35	98	6.07	229	28	30	90	-2.58461	88	286	8.6	81.9169	5.35	4.14	1.1	0
1206	2	177	80	25.5354	72	1	97	60	0	9.6	4.15	131	6.75	231	17.7	11.3	94	-2.07513	58	226.5	3.54	99.8321	0.68	1.42	0.96	0
1207	2	170	73	25.2595	54	1	129	87	0	7.4	4.91	152	5.95	249	15	18	69	-3.15411	69	219	6.76	105.953	1.43	2.36	0.81	0
1208	1	164	66	24.539	69	1	163	89	1	7.5	3.23	94	4.68	203	11	17	56	-1.84562	74	378.1	12.72	75.4886	0.93	2.61	1.77	0
1209	2	165	80	29.3848	74	1	167	70	1	7.6	4.26	131	5.93	128	27	25	61	-3.26298	79	319	5.2	89.8132	2.54	2.34	1.02	0
1210	1	156	55	22.6003	59	1	113	58	0	9.2	3.06	93	5.97	203	22	28	94	-2.8981	133	384	6.7	39.751	0.79	2.02	0.97	0
1211	1	151	67	29.3847	58	1	123	80	0	11	4.39	130	8.46	309	23.9	16.9	100	-2.75002	53	238.4	4.88	103.998	1.29	3.17	1.01	0
1212	2	160	57	22.2656	49	1	137	92	1	7.7	4.58	145	5.05	267	31.2	40.4	89	-2.7255	64	307.6	6.05	111.81	1.16	1.56	1.32	0
1213	1	160	55	21.4844	79	1	163	94	1	9.6	4.23	127	7.99	238	13	12	99	-2.75246	64	206	6.42	84.4372	1.91	2.36	0.91	0
1214	2	165	65	23.8751	49	1	160	101	1	5.7	4.33	142	7.35	292	10	12	53	-3.12438	69	295	6.74	109.299	1.83	3.52	1.03	0
1215	1	165	75	27.5482	77	1	115	68	0	6.8	3.32	112	4.83	212	59	37	77	-2.6304	55	431	6.19	91.5857	1.39	1.53	1.08	0
1216	2	168	65	23.03	67	1	140	88	1	5.8	4.33	136	7.1	198	29.7	23.7	70	-2.64422	98	458.3	5.3	72.8926	1.45	2.02	0.92	0
1217	1	156	59	24.2439	39	1	107	69	0	6.7	4.56	128	9.01	224	9	11	42	-3.0498	47	297	5.12	120.481	1.29	1.72	0.54	0
1218	1	165	75	27.5482	78	1	161	80	1	6.7	3.84	121	5.52	215	15	16	116	-3.28876	75	330	9.8	70.2388	1.39	3.08	1.02	0
1219	2	175	65	21.2245	64	1	137	79	0	10.4	5.13	167	4.71	180	20.4	18	82	-2.68846	62	338.1	6.06	102.833	1.18	2.05	1.06	0
1220	1	166	57	20.6852	52	1	112	65	0	6.5	4.33	138	5.05	226	22.8	23.5	78	-2.89821	50	228	9.32	109.478	0.77	1.89	1.23	0
1221	1	163	62	23.3355	70	1	122	74	0	9.7	3.98	123	4.4	301	24.4	15.4	74	-2.63099	50	354.6	4.27	97.8837	1.75	1.73	1.34	0
1222	2	163	76	28.6048	67	1	130	80	0	8.1	4.17	125	5.86	199	21	22	102	-2.8659	78	359	10.35	94.1712	1.07	2.92	0.9	0
1223	1	158	60	24.0346	55	1	119	86	0	7.2	4.24	119	4.47	185	10	15	86	-2.50996	53	314	6.23	105.956	1.4	2.33	1.35	0
1224	1	160	65	25.3906	76	1	130	60	0	7.1	3.68	117	5.21	141	29.1	27.8	86	-2.5429	46	323	3.8	96.2124	1.23	2.89	1.56	0
1225	1	160	81	31.6406	59	1	118	60	0	7.8	2.98	92	3.29	198	42	25	53	-2.68372	91	259	7.65	62.6787	1.68	5.26	0.99	1
1226	1	163	80	30.1103	54	1	121	78	0	10.5	4.03	126	3.73	81	39	23	86	-2.57344	36	206	7.99	117.033	4.32	2.32	0.63	0
1227	1	160	60	23.4375	64	1	132	88	0	8.2	4.25	127	5.65	217	15	17	88	-2.61402	49	280.7	4.7	102.101	1.78	3.32	1.23	0
1228	2	160	56	21.875	53	1	97	66	0	16.5	3.21	95	14.61	347	5	14	126	-1.92722	125	333	10.53	59.385	2.25	3.42	0.68	0
1229	1	150	55	24.4444	52	1	138	85	0	10.3	4.76	143	5.26	258	274	208	55	-2.60146	49	179	5.48	110.013	1.85	2.78	1.48	0
1230	1	162	58	22.1003	57	1	135	84	0	8.1	4.35	131	6.99	242	31.8	21.3	85	-3.00628	52	397.4	5.34	105.128	2.37	3.93	1.29	0
1231	2	178	85	26.8274	44	1	151	96	1	10.5	4.58	127	4.34	199	75.3	36.6	75	-3.0043	71	405.4	6.45	111.782	2.77	3.17	1.02	0
1232	1	165	60	22.0386	81	1	113	74	0	7.3	4.34	121	4.61	290	37	46.5	62.8	-2.44	53	299	8.49	90.1364	3.29	3.65	1.55	0
1233	2	183	105	31.3536	22	0	160	102	1	11.6	5.09	151	7.25	188	71	37.1	99	-2.46478	51	618.3	4.1	141.641	2.32	2.25	0.77	0
1234	2	170	67	23.1834	53	1	114	70	0	7.1	4.02	126	9.56	346	46	20	41	-2.40274	67	215	5.98	107.565	1.65	2.91	1.09	0
1235	1	165	55	20.202	71	1	127	62	0	8	3.69	109	6.95	82	23	23	69	-3.1093	62	221	5.1	92.1908	0.66	0.95	1.02	0
1236	2	171	65	22.2291	66	1	125	87	0	7	4.38	137	5.32	216	15	16	64	-2.56264	63	223	8.55	101.072	0.96	2.62	1.07	1
1237	2	170	66	22.8374	62	1	158	68	1	8.6	4.67	128	6.77	275	46.4	61.8	129	-1.40592	82	317.9	3.97	93.1286	1.23	3.32	1.54	0
1238	2	178	65	20.5151	65	1	139	70	0	5.6	3.41	120	3.64	177	7	23	42	-2.62676	54	349	5	106.549	0.55	0.98	1.86	1
1239	1	151	60	26.3146	74	1	161	82	1	6	3.85	113	6.25	244	14	19	81	-2.49915	53	269	7.98	94.1472	0.82	2.23	1.09	0
1240	1	165	62	22.7732	58	1	131	88	0	8	5.06	125	6.58	171	22	19	110	-3.16192	57	417	5.94	102.19	8.2	0.98	0.87	0
1241	1	165	46	16.8962	81	2	112	88	0	10.1	3.65	121	3.24	177	30	30	69	-2.4542	35	198	4.78	99.6163	1.04	1.94	1.4	0
1242	1	158	59	23.634	57	1	129	79	0	6.4	4.06	127	3.96	148	27	22	61	-2.71728	46	340	5.35	108.281	0.73	1.69	1.31	0
1243	1	160	95	37.1094	46	1	124	75	0	8.2	4.08	123	5.74	196	37	25	63	-2.75091	32	271	4.87	126.545	2.3	3.31	1	1
1244	1	160	66	25.7812	55	1	125	82	0	10.1	4.91	143	7.08	243	75	64	98	-3.05348	55	305	4.78	105.015	2.43	3.41	0.9	0
1245	2	165	78	28.6501	44	1	126	90	1	9.4	4.56	144	10.58	164	31.5	20.3	68	-3.00247	56	274	4.3	120.088	0.93	3.19	1.07	0
1246	2	170	72	24.9135	73	1	151	97	1	7.4	4.92	153	5.56	135	13	15	85	-3.4293	97	216	7.1	71.0923	1.51	1.56	1.1	0
1247	2	179	88	27.4648	38	1	119	88	0	11.9	5.23	155	7.1	325	100.3	73.9	99	-2.92289	68	472.7	5.53	117.555	3.15	4.18	1	0
1248	2	165	82	30.1194	70	1	128	78	0	6.6	5.14	161	5.5	120	46	41	73	-3.075	86	401	7.2	83.6861	1.7	3.71	0.92	0
1249	2	174	68	22.46	59	1	152	94	1	5.9	4.8	146	5.12	155	25	24	60	-2.8707	83	360	6.2	93.5123	1.06	1.52	0.91	0
1250	2	178	75	23.6713	61	1	136	68	0	6.5	4.93	147	4.65	222	19	17	59	-3.03158	58	416	6.23	106.901	1.13	1.3	0.86	0
1251	2	168	63	22.3214	63	1	116	69	0	6	4.65	141	5.41	134	12.4	15.8	52	-2.58684	80	390.5	5.86	95.3346	1.37	2.14	0.86	1
1252	2	178	61	19.2526	65	1	134	75	0	7.4	4.68	137	7.66	220	27	20	79	-3.25494	79	361	5.6	94.9837	2.02	2.59	1.08	0
1253	1	158	66	26.4381	57	1	150	66	1	9.4	4.01	115	3.59	120	31.4	28.7	78	-2.4287	56	281.1	6.47	103.267	1.9	2.43	1.04	0
1254	1	159	58	22.9421	62	1	133	81	0	8.7	2.74	96	6.84	54	86	85	176	-1.73662	72	331	9.2	81.4831	1.28	1.84	1.14	0
1255	2	178	81	25.565	36	1	171	113	1	11.9	4.73	136	7.32	179	13	13	73	-1.90515	60	356	4.34	123.612	1.82	2.91	1.04	1
1256	2	167	68	24.3824	61	1	133	85	0	8.9	5.29	161	6.12	267	19	19.3	103	-2.50756	76	379.5	3.69	98.5215	2.17	2.87	1.04	0
1257	2	163	69	25.9701	55	1	163	96	1	13.9	4.73	140	5.85	149	34	22	83	-2.74634	53	257	3.36	114.028	1.01	2.71	0.78	0
1258	2	155	50	20.8117	90	1	132	74	0	11.7	5.16	117	7.93	239	16	23	82	-3.01892	98	401	6.67	63.1772	1.39	3.26	1.64	0
1259	1	164	66	24.539	74	1	154	82	1	7.4	4.21	122	6.85	163	13	17.2	60	-2.49357	59	332.7	6.6	91.745	1.03	4.15	1.73	0
1260	2	178	81	25.565	56	1	104	72	0	7.3	4.92	150	3.9	134	25	17	86	-2.82006	78	300	4.49	100.839	1.77	1.43	0.57	0
1261	2	183	65	19.4094	59	1	156	90	1	15.1	5.12	149	7.87	255	40	32	58	-2.85136	63	312	7.84	105.569	0.92	3.56	1.34	0
1262	2	178	75	23.6713	68	1	141	78	1	5.8	3.79	117	5.49	96	11.9	14.9	51	-2.4707	101	338.2	5.27	69.8663	0.91	2	1.18	0
1263	1	172	68	22.9854	60	1	163	90	1	11.8	5.08	139	6.74	266	19	20	111	-2.80302	43	258	6.98	108.02	3.84	2.14	1.11	1
1264	1	160	65	25.3906	62	1	167	93	1	9.1	4.92	139	4.32	183	19	23	67	-3.22608	59	260	7	98.8541	0.91	2.98	1.07	0
1265	1	160	63	24.6094	70	1	151	79	1	6.4	4.49	128	5.41	177	26	18	73	-3.39067	49	148	7	98.3614	1.49	3.36	1.03	0
1266	2	173	90	30.0712	49	1	113	87	0	8.1	5.29	159	6.2	223	21.8	18.3	73	-3.0624	97	494	10.33	82.5366	2.3	2.43	0.94	1
1267	1	155	59	24.5578	68	1	133	78	0	11.7	4.48	136	7.28	272	9.8	22	102	-2.45848	47	319.3	4.63	100.598	0.91	3.63	1.23	0
1268	2	175	80	26.1224	70	1	116	60	0	9	4.54	138	5	314	14	13	69	-2.78806	94	513	7.96	75.2139	1.42	2.66	0.67	0
1269	2	176	100	32.2831	67	1	116	63	0	6.7	4.49	142	8.78	206	18.6	21.5	57	-2.43224	89	329.1	5.56	81.8251	1.5	1.62	0.83	1
1270	2	167	80	28.6851	48	0	150	97	1	7	3.33	97	5.66	183	34.3	21.9	70	-2.49042	108	489.7	9.99	73.0071	1.87	2.14	0.94	0
1271	2	178	86	27.143	66	1	120	81	0	7.7	3.31	99	5.9	350	19.3	46.1	48	-2.45504	104	227.9	2.31	68.2992	1.35	3.1	0.88	0
1272	2	180	72	22.2222	28	0	117	77	0	11.8	4.79	143	6.09	162	26.1	23.6	109	-2.32035	55	180.1	4.5	133.377	2.28	2.21	1.69	0
1273	2	170	82	28.3737	77	1	159	85	1	10.2	4.31	132	5.81	140	25.9	25.1	93	-2.88466	118	544.6	8.02	54.8133	5.32	2.35	0.79	0
1274	1	165	69	25.3444	60	1	143	86	1	9.8	4.39	124	7.29	316	15.4	14	99	-2.4117	63	285.7	7.28	96.8412	1.96	1.98	1.44	0
1275	2	177	84	26.8122	46	1	128	90	1	9	4.72	150	6.91	198	30.2	21.4	70	-2.78198	57	378.3	6.64	117.972	4.11	2.08	0.91	0
1276	1	158	53	21.2306	83	1	152	83	1	7.2	3.93	126	7.41	262	8	14.7	56	-2.5817	66	415.5	7.23	79.3767	1.7	1.58	0.96	0
1277	2	170	99	34.2561	48	1	138	94	1	8.9	4.65	140	6.02	156	74	35	95	-2.85916	78	512	6.85	105.983	3.93	2.92	0.88	0
1278	2	178	86	27.143	42	1	147	97	1	10.1	5.36	154	5.24	195	14	14	93	-2.52442	71	265.4	6.1	113.182	2.96	2.78	0.98	0
1279	2	182	78	23.5479	82	1	135	78	0	5.7	3.78	112	6.23	114	14	16	60	-2.29126	127	648	13.22	48.6491	1.19	2.48	1.06	0
1280	2	170	78.4	27.128	46	1	137	88	0	8.8	3.98	121	4.33	72	17	16	58	-2.73432	60	503	4.29	116.158	3.38	1.63	0.61	0
1281	2	167	72	25.8166	72	1	175	94	1	7.4	4.49	143	5.15	109	48	29	104	-2.88201	98	389	7.6	70.6607	1.75	2.41	0.87	0
1282	1	161	55	21.2183	74	1	163	97	1	11.5	3.9	124	6.54	208	17	31	117	-3.08874	77	249	8.82	69.7695	1.02	1.25	1.17	0
1283	2	170	84	29.0657	54	1	136	88	0	7.6	4.76	139	4.72	67	34.4	27.3	78	-3.37308	76	503.8	5.82	102.905	1.9	1.75	0.78	0
1284	2	171	80	27.3588	29	1	151	99	1	10.3	5.38	167	6.41	202	28.6	19	73	-2.67642	61	474.3	3.73	128.469	1.28	2.38	0.65	0
1285	2	178	81	25.565	48	1	132	89	0	13.3	5.16	157	8.19	180	20	16	143	-3.05046	54	310	4.3	118.431	2.32	2.32	0.53	0
1286	1	154	49	20.6612	48	1	133	90	1	11.4	3.95	94	5.92	290	13	11	62	-2.65523	47	367	4.3	113.922	1.31	2.72	0.95	0
1287	2	183	81	24.187	58	1	144	95	1	7.2	4.31	129	4.82	116	43	29	43	-2.81826	81	417	7.62	96.8906	1.96	2.18	0.79	1
1288	2	163	74	27.852	57	1	102	71	0	5.7	4.03	131	5.42	136	22	19	53	-2.92094	39	255	8.49	123.549	3.44	1.88	0.81	0
1289	2	174	75	24.7721	60	1	146	94	1	6.8	4.77	152	7.18	185	21	17	58	-2.9169	47	314	5.26	114.621	5.38	2.15	0.84	0
1290	1	158	60	24.0346	69	1	117	81	0	8.6	3.49	105	6.39	165	4	13	88	-3.5781	88	351	9.6	61.3169	1.7	2.38	1.17	0
1291	2	170	72	24.9135	67	1	138	93	1	6.1	4.47	128	6.87	140	25	21	70	-2.51726	94	435	4.8	76.6304	0.91	1.36	0.79	0
1292	2	182	61	18.4157	64	1	139	85	0	12.1	3.44	101	4.27	121	16	17	88	-1.9045	173	469	13.5	37.5493	0.72	0.72	1.06	0
1293	2	168	60	21.2585	74	1	156	98	1	8.4	4.57	156	3.73	161	13	20	82	-2.24304	74	254	3.9	91.6043	1.02	2.12	1.03	0
1294	2	165	71	26.079	44	1	110	81	0	5.8	5.33	160	4.44	147	32	28	79	-2.89503	66	386	6.93	114.275	1.35	3.68	0.91	0
1295	2	180	80	24.6914	53	1	104	79	0	9	4.26	141	5.47	136	22	16	124	-2.70716	119	590	13.15	62.9959	7.62	0.99	0.53	0
1296	2	173	92	30.7394	55	1	115	75	0	8.8	4.82	145	5.56	159	12.3	16.8	52	-2.58646	73	312.9	5.58	103.519	1.68	2.57	0.88	1
1297	2	172	91	30.7599	60	1	118	27	0	6.1	4.23	135	4.99	245	26.2	18.2	107	-3.11988	68	332.6	4.69	102.523	1.15	2.03	0.92	0
1298	1	153	68.5	29.2622	59	1	121	56	0	5.5	3.51	115	6.91	180	20	14	37	-2.55436	36	265	4.9	113.45	1.35	2.1	1.78	0
1299	1	160	63.5	24.8047	58	1	127	81	0	8.7	4.69	131	7.35	274	14.7	20.9	95	-3.11474	106	556.1	11.76	52.5175	4.14	3.42	1.13	0
1300	1	162	64	24.3865	73	1	148	89	1	6.5	3.85	114	10.06	321	10	16	83	-3.02372	36	289	7.2	103.99	1.29	2.82	0.9	0
1301	2	172	80	27.0416	38	1	140	95	1	12.8	4.6	135	5.04	232	23	14	60	-2.54488	49	320	5.31	129.784	1.76	3.55	0.82	1
1302	2	165	52.5	19.2837	29	0	132	72	0	9.9	4.43	127	6.26	164	26	20	212	-2.37132	31	423	3.81	157.608	1.25	1.25	0.47	0
1303	1	155	48	19.9792	74	1	105	60	0	6.8	2.92	91	6.71	291	30	29	97	-2.33021	70	135	4.3	78.2235	1.64	3.03	0.77	0
1304	2	170	80	27.6817	59	1	113	79	0	7.6	4.17	128	7.14	262	14	17.4	63.6	-2.9075	203.1	489.8	11.53	31.9529	1.85	1.33	0.55	0
1305	1	158	62	24.8358	59	1	127	87	0	7.4	3.9	126	5.82	287	15.7	20.7	107	-2.86574	57	291.4	5.2	101.556	1.84	2.55	1.22	0
1306	2	170	87	30.1038	61	1	128	81	0	9.7	4.38	132	7.24	248	11	16.1	47	-2.39173	123	547.9	11.72	57.6069	4.37	4.14	1.3	0
1307	2	176	85	27.4406	62	1	117	52	0	7.2	3.88	118	5.51	98	16	15	67	-3.06892	73	218	6.2	99.1088	0.42	0.53	0.86	0
1308	2	176	77.5	25.0194	50	1	138	92	1	6.4	4.52	135	7.56	159	22	19.2	69	-2.93852	63	395.9	6.81	111.647	1.95	3.01	1.08	0
1309	2	170	74	25.6055	90	1	151	60	1	5.9	4.62	142	4.99	195	25	26	63	-3.14555	110	354	10.37	54.9997	0.99	1.51	1.3	0
1310	2	178	79	24.9337	41	1	125	76	0	5.8	4.97	143	4.46	211	20.6	16.9	57	-2.74542	74	274.2	8.59	112.473	1.25	2.47	0.9	0
1311	2	172	83	28.0557	66	1	114	66	0	7.7	4.39	139	6.64	226	15	17	84	-2.99059	102	319	7.3	69.9094	1.43	2.6	0.9	0
1312	2	165	65	23.8751	77	1	152	80	1	7.4	3.94	126	3.4	142	34	29	53	-3.25356	58	348	6.7	96.7755	1.43	2.4	1.36	0
1313	2	184	120	35.4442	39	1	197	114	1	7.6	5.31	156	6.12	139	71	42	113	-2.92664	74	520	4.94	113.881	2.81	3.65	0.83	0
1314	2	162	65	24.7676	62	1	140	90	1	8.5	3.41	111	5.84	144	18.4	26.8	61.2	-3.3096	160.8	337.8	8.18	41.5065	0.79	1.87	1.34	0
1315	1	158	70	28.0404	58	1	117	72	0	9.2	3.8	124	3.74	223	51	27	162	-2.73048	52	352	6.17	104.476	1.65	3.57	0.89	1
1316	2	167	60	21.5139	61	1	132	71	0	11.6	3.91	114	4.54	152	35	39	66	-3.09488	67	209	9.2	102.344	1.21	2.56	1.48	0
1317	2	172	74	25.0135	60	1	153	93	1	5.6	4.51	142	4.75	213	10.1	15.9	71	-2.64598	84	460.2	6.24	91.6065	1.23	2.58	1.3	1
1318	2	178	79	24.9337	53	1	170	89	1	6.9	4.97	148	14.47	228	15.7	14.8	63	-2.67042	62	353.2	6.37	110.114	1.5	1.86	0.78	0
1319	2	170	66	22.8374	40	1	119	76	0	8.6	5.3	164	6.35	125	21.4	16.6	67	-2.83676	72	290.8	5.71	114.115	1.68	2.49	0.79	0
1320	2	172	75	25.3515	58	1	139	92	1	6.1	4.5	130	4.3	165	27.3	17	53	-2.05762	51	399.6	5.93	113.228	1.16	2.1	1.06	0
1321	2	182	75	22.6422	55	1	130	80	0	12	4.78	145	6.51	184	11.1	10.8	59	-2.39821	56	338.3	5.7	112.148	2.71	3.55	1.06	1
1322	1	153	65	27.7671	59	1	160	76	1	8.5	4.18	122	6.85	320	8	12	105	-2.59946	50	406	4	104.814	3.04	4.85	1.45	0
1323	2	182	85	25.6612	35	1	122	78	0	9.9	4.79	158	6.5	204	49.3	24.5	66	-2.5099	67	656.4	4.2	120.306	2.01	3.34	0.87	0
1324	1	153	57	24.3496	45	1	144	88	1	7.3	3.96	135	6.24	361	31	38	42	-2.64133	47	270	3	116.068	56.55	1.07	6.57	0
1325	2	175	70	22.8571	56	1	131	85	0	8.1	3.95	124	5.24	144	10.5	13.6	59	-2.68343	59	343.2	5.63	109.71	1.65	3.67	1.35	1
1326	1	160	58	22.6562	57	1	114	87	0	6	4.34	130	6.32	206	35.4	24.9	71	-2.46382	51	257.6	6.18	105.621	1.25	2.38	0.87	0
1327	1	158	62	24.8358	70	1	144	87	1	12.6	3.27	95	6.7	264	9.2	18	105	-2.24002	80	301.7	7.27	68.3204	2.85	2.73	1.17	0
1328	2	170	70	24.2215	82	1	138	72	0	7.6	3.89	116	8.32	232	20	17	85	-3.3924	55	354	5.5	95.3292	1.84	0.66	0.82	0
1329	2	174	73	24.1115	59	1	139	89	0	7	4.36	140	7.81	214	14	16	95	-3.05196	69	277	8.6	102.708	1.37	2.15	0.79	0
1330	2	167	67	24.0238	56	1	132	90	1	6.1	3.85	124	4.74	132	17.5	16.4	44	-2.64144	76	403.8	5.59	101.633	0.66	1.3	0.84	0
1331	1	156	43	17.6693	75	1	124	76	0	5.5	4.55	138	6.34	158	15.3	20.3	147	-2.96103	72	293	10.76	75.1544	1.18	1.38	0.97	0
1332	1	165	74	27.1809	70	1	101	61	0	6.2	3.28	96	4.32	190	8.2	14.4	85	-2.66759	55	311.1	6.93	95.6609	1.49	2.17	0.58	0
1333	2	167	60	21.5139	63	1	151	103	1	7.4	5.19	159	12.76	155	29	124	104	-2.95692	55	168	7	107.287	1	2.14	1.12	0
1334	1	162	60	22.8624	53	1	108	73	0	8.7	3.77	116	3.5	111	118	105	101	-2.52233	35	289	3.61	118.566	9.34	1.07	0.38	0
1335	2	175	64	20.898	53	1	113	67	0	7.9	4.96	148	7.3	229	24.4	21.8	80	-2.63746	61	314.2	2.95	110.656	1.25	2.95	1.11	0
1336	1	160	73	28.5156	52	1	128	81	0	10.8	4.83	141	3.81	218	24.4	18.1	82	-2.6388	45	286.1	6.25	112.294	4.56	3.46	1.1	0
1337	2	165	65	23.8751	67	1	112	81	0	6.4	4.83	150	8.93	268	36	27	77	-3.60488	85	509	9.7	86.4673	1.5	3.1	1.11	1
1338	2	168	71	25.1559	59	1	180	98	1	7.5	4.67	146	7.22	293	17	18	79	-2.49298	77	404.7	5.8	99.3616	1.69	3.45	0.88	0
1339	2	172	75	25.3515	58	1	150	88	1	7.8	4.78	148	6.6	208	20	16	111	-3.03902	131	253	9.37	54.4174	0.99	2.52	1.19	0
1340	1	166	63	22.8625	59	1	166	113	1	6.5	4.34	127	5.31	171	17	14	71	-2.98122	43	281	5.78	108.694	1.85	2.83	0.96	0
1341	2	160	75	29.2969	71	1	137	79	0	6.5	3.21	97	5.34	229	11	18	84	-2.62907	84	397	7.6	85.5491	1.41	2.66	0.66	1
1342	2	169	78	27.31	51	1	139	95	1	8.3	4.9	159	8.22	215	37	24	83	-2.45252	39	351.2	5.1	128.246	2.02	2.93	0.85	0
1343	2	165	79	29.0174	44	1	131	87	0	8.5	5.22	147	4.52	162	38	20	53	-2.61147	68	290.2	5	113.249	0.97	3.72	0.99	0
1344	1	163	61	22.9591	69	1	142	83	1	11.1	4.4	128	5.21	204	9.8	15.1	82	-2.52824	45	249.1	4.79	101.027	1.96	2.28	1.59	0
1345	2	175	67	21.8776	52	1	140	68	1	7.5	4.9	146	6.27	181	31	18	59	-3.091	70	370	4.77	106.814	2.17	2.78	0.91	0
1346	2	179	84	26.2164	38	1	139	109	1	11.1	4.81	139	5.56	171	17	13	68	-2.78861	53	355	6.68	126.744	1.47	3.2	0.83	1
1347	2	170	80	27.6817	70	1	158	93	1	7.7	4.83	145	5.47	189	31.6	21.6	93	-2.42858	85	293.3	5.52	84.869	1.57	3.43	0.94	0
1348	1	162	78	29.7211	28	0	123	77	0	11	4.9	150	7.41	264	128.5	71.8	84	-2.57748	49	318.5	5.43	127.722	1.97	4.19	0.73	0
1349	2	165	58	21.3039	84	1	124	66	0	6.6	4.08	128	6.28	158	27	25	56	-2.48896	70	326	8.87	87.5375	0.55	1.93	1.1	0
1350	2	172	71	23.9995	57	1	159	94	1	8	4.05	125	7.04	277	16	15.9	94	-2.31342	68	410	7.15	104.454	5.15	1.93	0.61	0
1351	1	160	63	24.6094	50	1	145	83	1	7.7	4.37	128	5.89	226	15	15	105	-3.34502	49	234	6.2	111.39	1.08	4.04	1.12	0
1352	2	165	60	22.0386	40	1	102	75	0	9.2	4.48	128	3.83	169	7.4	10.5	53	-2.3722	72	388.6	6.3	114.115	1.7	3.05	1.09	0
1353	2	170	85	29.4118	77	1	149	78	1	7.3	3.7	109	8.98	271	15.6	15.8	135	-2.61717	86	552.8	7.99	80.121	0.84	1.6	0.68	0
1354	2	159	61	24.1288	62	1	165	79	1	9.5	4.11	126	6.98	380	15	18	103	-2.58916	124	392	11.5	56.6962	1.41	2.28	0.55	0
1355	1	152	71	30.7306	67	1	126	71	0	6.5	3.74	110	6.35	167	17	18	61	-2.46515	44	423	5.4	102.847	0.81	3	0.81	0
1356	2	178	71	22.4088	65	1	140	68	1	6.4	3.19	114	4.28	58	25	19	87	-2.30227	67	217	5.3	99.8293	1.2	2.58	0.7	1
1357	2	171	75	25.6489	56	1	121	82	0	7.9	4.65	148	4.54	168	35	23.3	75	-2.68338	55	244	4.07	112.06	1.12	1.94	0.74	1
1358	2	168	70	24.8016	68	1	143	72	1	10.1	5.08	145	13.24	180	20	25	84	-2.7617	61	291	9.81	100.8	1.68	2.47	0.82	0
1359	1	150	75	33.3333	52	1	150	81	1	11.3	4.78	146	7.15	197	17.5	18	60.5	-2.6808	38.2	454.8	6.45	116.816	2.31	3.13	0.7	0
1360	2	165	60	22.0386	59	1	129	67	0	7.7	3.53	106	6	122	13	16	85	-2.18436	44	343	5.12	117.657	0.91	0.8	0.68	0
1361	1	165	84	30.854	65	1	157	83	1	6.6	3.92	113	5.63	222	13	19	105	-3.41472	45	181	5.5	103.572	1.55	2.26	1.15	0
1362	1	165	52	19.1001	60	1	118	82	0	7.4	3.81	113	5.25	172	27.1	29.3	70	-2.56729	49	350.5	4.3	104.673	1.32	1.82	1.34	0
1363	2	175	115	37.551	34	1	153	77	1	7.5	4.6	135	6.35	197	86	49	98	-3.16342	61	552	7.04	124.536	2.56	3.07	0.95	0
1364	2	177	71	22.6627	55	1	140	86	1	8.7	5.29	155	10.17	156	18	17	68	-2.73176	47	273	3.37	118.241	1.12	1.06	0.71	0
1365	1	157	51	20.6905	55	1	100	73	0	5.7	4.13	119	4.54	95	34	62	39	-1.80353	60	125	2.36	102.835	1.51	1.52	0.71	0
1366	2	164	55	20.4491	81	1	127	80	0	8.7	4.75	140	10.91	230	20.1	18.6	97	-2.09106	64	330.8	5.37	91.6326	0.72	3.28	1.06	0
1367	2	175	110	35.9184	43	1	126	92	1	7	4.99	146	8.98	319	15	12	88	-3.09258	61	391	6.99	117.757	1.43	4.24	1.07	0
1368	2	175	70	22.8571	56	1	126	80	0	7.5	4.41	133	4.67	150	12	21	43	-2.23259	61	321.4	5.5	108.611	0.83	2.78	1.27	0
1369	2	173	87	29.0688	57	1	135	86	0	9.3	4.8	147	6.04	236	41.7	23.7	34	-2.64112	104	588.7	7.19	72.2312	1.6	1.85	0.94	0
1370	1	156	56	23.0112	59	1	127	70	0	10.7	4.07	118	5.06	231	13	10	59	-3.07468	45	150	5.1	107.51	0.77	1.6	1.43	0
1371	1	162	49	18.6709	59	1	117	72	0	9.4	4.09	111	5.9	216	28	14	117	-3.18584	40	181	4.8	110.605	1.38	2.96	1.23	0
1372	2	188	79	22.3517	66	1	106	68	0	10.5	4.72	142	5.87	147	16	17	74	-2.66702	90	429	7.35	81.239	1.17	0.77	0.48	0
1373	1	160	70	27.3437	70	1	145	79	1	7.2	3.92	113	3.48	127	20.2	24.3	61	-2.5023	61	280.6	4.78	93.3034	0.88	2.45	1.01	1
1374	2	172	82.5	27.8867	83	1	136	88	0	6.8	4.14	140	5.49	150	13	19	66	-2.5199	70	337	3.77	88.0836	1.08	1.74	0.83	0
1375	2	170	90	31.1419	79	1	148	89	1	6.8	4.81	149	6.13	179	13.9	14.3	93	-2.22904	45	284.9	3.35	103.193	0.86	1.73	0.98	0
1376	2	166	75	27.2173	75	1	131	86	0	13.1	4.52	136	6.46	214	15	13.9	72	-1.5743	64	267.7	5.19	95.1166	0.84	2.4	0.89	1
1377	2	170	73	25.2595	53	1	132	87	0	6.9	5.51	159	9.93	206	22	19	67	-2.7772	81	403	6.63	99.9509	1.58	3.67	0.74	1
1378	1	163	80	30.1103	73	1	138	86	0	9.7	4.58	125	6.42	248	52.6	39.8	76	-2.49878	74	303.8	8.7	73.6339	1.46	1.74	0.99	0
1379	1	150	64	28.4444	43	1	125	90	1	8.4	4.07	117	9.32	176	84.3	86.4	104	-2.45062	44	478	4.48	119.404	3.82	2.99	0.97	0
1380	2	175	83	27.102	45	1	140	95	1	9	4.62	140	8.5	234	23.1	15.8	98	-2.64614	148	479.6	7.44	50.9639	3.62	3.6	0.93	0
1381	2	168	73	25.8645	61	1	110	72	0	10.2	4.34	127	4.85	151	19.2	14.6	82	-2.76026	78	253.5	5.93	97.7517	1.58	3.21	0.95	0
1382	1	163	60	22.5827	79	2	125	67	0	9.7	3.71	108	4.01	149	19	16	102	-3.15151	65	289	7.9	82.8807	1.41	2.01	0.79	0
1383	2	175	75	24.4898	58	1	163	101	1	7	5.09	151	6.31	226	54	34.7	85	-2.77724	65	362.4	4.49	105.23	2.22	3.22	1.02	1
1384	1	168	73	25.8645	56	1	139	94	1	8.4	4.25	114	5.81	231	16	14	103	-2.75766	54	263	4.6	104.826	1.05	2.08	1.21	0
1385	2	168	68	24.093	57	1	138	85	0	11.7	4.2	131	9.67	171	14.1	20.2	86	-1.9923	53	241.6	10.6	112.618	1.37	3.26	1.42	0
1386	2	172	65	21.9713	61	1	135	82	0	13.1	4.35	137	7.41	158	35.3	24.6	89	-2.29807	83	328.9	5.9	92.3564	1.57	3.83	1.07	1
1387	2	165	65	23.8751	45	1	78	51	0	9.8	4.13	130	23.63	203	1824	2519	187	-2.50403	217	544	13.2	32.1977	5.92	3.17	0.84	0
1388	2	161	65	25.0762	76	1	159	96	1	10.8	4.56	143	6.92	413	71	48	93	-2.65171	66	208	5.7	93.6525	1.01	2.9	1.15	0
1389	2	172	80	27.0416	57	1	130	93	1	8.2	4.97	151	7.39	131	28	16	108	-2.65398	75	388	9.1	101.408	3.23	3.2	0.87	0
1390	1	145	45	21.4031	71	1	147	97	1	8.1	3.75	114	7.04	288	19	11	95	-3.20661	114	554	10.1	44.3886	6.83	2	0.86	0
1391	1	158	60	24.0346	66	1	150	87	1	6.3	3.93	119	6.69	268	12	13	123	-3.10574	47	255	5.7	101.857	1.31	1.88	1	0
1392	2	173	66	22.0522	54	1	141	84	1	8.2	5.03	146	8.4	220	24	20	81	-2.91066	65	404	7.2	107.881	2.58	3.7	0.86	0
1393	2	175	75	24.4898	54	1	109	74	0	8.1	4.58	141	4.82	113	84.2	52.7	129	-2.69902	69	424	7.13	105.953	3.61	2.97	0.82	1
1394	1	160	60	23.4375	67	1	165	105	1	6	3.76	113	3.69	162	20.8	21.9	47	-2.12914	58	233.7	5.23	96.223	1.54	4.03	1.32	0
1395	1	147	60	27.7662	73	1	107	63	0	7.5	4.26	128	7.55	214	11.3	14.6	74	-2.64759	46	268	3.97	98.0244	1.35	2.04	1.03	0
1396	1	150	60	26.6667	75	1	129	78	0	6.9	3.96	121	4.72	186	16	22.7	94	-2.6782	41	216	5.77	99.535	1.06	2.9	1.44	0
1397	1	160	74	28.9062	77	1	156	84	1	8.1	4.24	133	6.59	228	21	30	76	-2.04856	68	460.2	5.7	79.4952	2.38	3.44	1.04	0
1398	2	170	58	20.0692	59	1	126	89	0	6.9	4.06	125	7.13	219	11	12	78	-3.33828	84	408	5.6	92.178	1.04	3.79	1.29	1
1399	1	146	86	40.3453	69	1	138	72	0	11.2	4.46	136	11.33	333	18.6	18.7	103	-2.7054	76	400.7	8.2	73.1111	1.35	4.33	1.7	0
1400	1	158	68.5	27.4395	75	1	152	91	1	7.3	4.25	128	6.8	248	16.2	19	71	-2.6181	45	255.5	9.01	97.3269	1.15	2.34	1.43	0
1401	1	158	50	20.0288	59	1	120	80	0	6.8	4.09	91	7.76	300	20	21	73	-1.8913	58	272	7.6	101.132	1.85	3.7	1.89	0
1402	1	162	64	24.3865	59	1	122	73	0	8.6	4.52	134	5.48	272	15	18	98	-3.13899	39	273	5.97	111.282	3.51	2.49	0.8	0
1403	1	167	70	25.0995	50	1	127	84	0	6.2	3.94	86	7.81	319	9.9	16.8	37	-2.82284	47	453.1	3.68	112.514	4.2	2.33	0.92	1
1404	1	154	63.5	26.7752	58	1	135	80	0	9.7	4.27	129	5.29	106	132.3	89.7	111	-2.63784	50	287.4	4.24	105.468	1.9	3.51	1.03	0
1405	2	176	72	23.2438	60	1	112	75	0	6.3	4.41	132	6.33	306	7	12	64	-2.7273	71	323	5.1	101.195	1.14	1.78	1.1	0
1406	2	170	90	31.1419	52	1	141	94	1	8.7	6.69	218	6.86	195	22.4	30.8	122	-2.92541	62	359.3	2.97	110.801	2.07	2.72	0.91	0
1407	1	164	65	24.1672	62	1	121	61	0	9.9	3.82	119	5.87	143	23	22.9	90	-2.57748	66	315	6.19	90.4511	5.29	6.24	1.52	0
1408	2	165	53	19.4674	61	1	127	73	0	6.6	3.44	96	7.6	259	16.7	15.5	66	-2.59597	204	292.3	17.21	31.3909	0.89	2.41	0.86	0
1409	2	158	55	22.0317	82	1	144	77	1	7.1	4.05	125	6.5	147	35	52	111	-3.01948	167	330	10.18	35.0251	1.26	2.58	0.98	0
1410	1	153	70	29.903	66	1	125	75	0	10.5	3.63	112	10.3	305	18	16	93	-3.08662	100	472	8.82	53.5874	3.05	3.61	1.5	0
1411	2	182	79	23.8498	55	1	123	80	0	10.3	4.58	144	7.61	253	7	8	49	-2.81548	47	353	5.5	118.241	1.48	3.4	1	1
1412	2	172	64	21.6333	56	1	143	97	1	11.8	4.8	138	5.6	138	29.5	19.5	93	-2.47246	66	275.5	6.29	106.057	2.4	2.65	0.89	0
1413	2	172	77	26.0276	49	1	131	89	0	7.5	5.05	149	10.5	185	24.5	24.2	94	-2.96953	66	397.1	5.84	110.776	1.56	3.05	0.94	0
1414	2	176	62	20.0155	57	1	135	84	0	8.2	3.92	126	6.52	297	17	18	52	-3.14166	59	233	6.92	109.029	0.68	1.08	1	0
1415	2	175	85	27.7551	78	1	142	80	1	8.1	3.65	116	5.1	146	113	93	122	-2.70549	120	452	13.48	53.3858	1.13	1.88	0.63	0
1416	2	162	95	36.1988	61	1	130	74	0	6.6	4.03	122	6.14	182	58	24	58	-3.08923	68	280	6.7	101.887	0.77	2.24	0.98	0
1417	1	158	45	18.026	72	1	150	90	1	16	3.25	86	4.09	184	3.8	12	74	-1.75044	122	322	11.05	40.6654	1.39	3.85	1.25	1
1418	1	155	77	32.0499	53	1	108	72	0	8.9	4.44	124	5.36	151	33.6	25.5	109	-2.30826	68	335.7	6.87	92.2922	4.29	3.47	1.19	0
1419	2	173	70	23.3887	57	1	135	91	1	8.4	4.87	151	8.68	170	38	24	79	-2.72976	59	220	6.33	109.029	4.5	3.15	0.78	1
1420	1	158	55	22.0317	73	1	154	71	1	6.4	3.95	128	4.16	161	15	20.8	73.7	-2.47928	42.9	185.4	4.86	99.6866	0.82	1.72	1.98	0
1421	2	171	56	19.1512	84	1	143	85	1	10	4.64	134	5.69	227	15.9	18.7	65	-2.26126	73	381.7	6.68	86.4351	0.67	3.33	1.29	1
1422	2	172	85	28.7317	77	1	141	85	1	7.9	3.51	110	9.17	237	14	34	91	-1.97024	62	363	6.9	94.8458	1.07	3.49	0.86	0
1423	1	147	44	20.3619	76	1	156	67	1	8.7	3.18	97	7.31	335	6.5	16.4	78	-2.14312	130	456.6	12.75	36.7554	3.32	7.4	1.79	0
1424	2	173	69	23.0546	64	1	100	64	0	8	4.92	154	4.72	165	12	14	76	-2.62211	104	381	12.1	69.154	1.06	2.11	0.76	0
1425	1	159	54	21.3599	56	1	110	78	0	7.2	4.46	126	6.4	197	10	17	87	-2.94846	57	286	6.06	103.469	1.25	2.15	1.12	0
1426	2	170	83	28.7197	53	1	136	89	0	14.4	4.37	133	5.45	185	9	12	51	-2.44198	56	284	4.52	113.551	1.31	2.61	0.72	0
1427	2	168	65	23.03	53	1	100	73	0	7.5	3.52	108	3.7	335	37	53	59	-2.0084	113	491	15.37	67.0308	2.45	1.76	0.45	0
1428	2	165	64	23.5078	59	1	114	71	0	8	4.03	126	3.22	113	17.2	15.7	54	-2.77992	82	277.8	7.2	94.8825	1.09	2.74	1.04	1
1429	1	155	46	19.1467	85	1	128	75	0	7.8	3.78	115	8.94	329	28	181	171	-2.50162	60	184	4.6	85.3321	1.95	3.68	1.69	0
1430	2	180	81	25	59	1	130	84	0	7.7	4.67	154	6.1	149	14.4	15.8	68	-2.78654	73	367.9	4.64	100.975	2.62	3.83	1.06	0
1431	1	160	83	32.4219	40	1	109	84	0	7.5	5.05	137	10.24	276	32.7	24.6	87	-3.01998	48	306.3	6.33	119.128	1.98	1.99	1.27	1
1432	1	154	50	21.0828	78	1	158	71	1	7.2	3.85	117	4.89	218	17	20	64	-3.0539	55	224	3.71	91.0178	1.16	1.86	1.02	0
1433	2	167	69	24.7409	68	1	113	82	0	5.7	3.48	109	9.2	223	146	164	58	-2.26769	129	254	9.8	52.089	1.19	2.82	1.03	0
1434	1	160	73	28.5156	60	1	155	85	1	9.7	4.43	118	5.66	270	13	20.8	80	-2.97749	51	275	5.86	103.669	1.37	1.49	1.13	0
1435	2	175	72	23.5102	38	1			0	12.9	5.04	151	5.95	208	18.8	13.7	124	-2.41903	60	380.6	5.08	122.084	1.45	3.76	1.07	1
1436	2	171	60	20.5191	53	1	110	74	0	7.8	4.74	133	5.63	221	14.9	15.3	66	-2.36989	72	256.2	8.05	105.252	1.84	5.84	1.19	0
1437	2	168	63	22.3214	52	1	107	90	1	9.4	5.25	155	9.66	387	49.2	26.5	88	-2.19549	81	581.6	7.3	100.574	1.48	3.69	1.12	1
1438	2	176	76	24.5351	52	1	140	91	1	11.8	6.75	140	6.23	183	27.9	19.6	80	-2.6527	70	335	6.75	106.814	3.8	3.32	0.96	0
1439	2	174	73	24.1115	68	1	137	85	0	6	3.89	121	5.99	190	18.8	15.6	53	-2.60829	69	331.9	5.03	97.1174	1.48	1.63	0.77	0
1440	2	165	50	18.3655	73	1	112	71	0	10.8	4.18	120	5.21	308	7.9	14.7	52	-2.57588	58	368.4	6.84	99.2132	1.13	2.42	0.86	0
1441	1	154	64	26.986	70	1	124	84	0	6.5	4.78	133	6.24	206	33	19	101	-3.4175	48	303	5.6	98.8514	0.83	1.48	1	0
1442	2	169	65	22.7583	63	1	129	68	0	10.5	4.68	124	5.8	147	27	21	62	-2.7632	89	300	7.89	83.8862	2.15	2.13	0.76	0
1443	2	162	60	22.8624	77	1	110	70	0	10.2	3.36	108	8.55	112	17	13	33	-3.1039	45	205	13.86	104.484	1.79	1.41	0.74	1
1444	2	174	73	24.1115	40	1	113	74	0	6.3	5	153	6.69	262	41	23	52	-2.85054	49	298	6.8	128.18	1.67	2.74	0.8	0
1445	1	149	57	25.6745	57	1	125	75	0	8.2	4.08	129	8.58	142	25.1	16.3	52	-2.5302	43	182	7.67	110.055	1.09	1.41	1.26	0
1446	2	165	59	21.6713	64	1	140	75	1	12.2	4.08	123	4.19	106	17.7	13.4	71	-2.41852	67	254.7	5.88	100.452	1.42	2.18	1.18	0
1447	2	178	82	25.8806	36	1	184	131	1	8.9	5.61	162	11.36	244	42.9	21.9	78	-2.1392	100	438.1	6.6	86.2752	19.51	3.81	0.78	0
1448	2	182	92	27.7744	36	1	160	108	1	7.1	4.89	139	5.66	181	19.5	19	70	-2.34164	67	534.5	4.81	119.56	10.97	2.67	0.83	1
1449	2	165	52	19.1001	73	1	116	79	0	6.8	4.75	144	4.34	152	18	20	49	-2.65261	69	287	11.9	94.1439	1.16	2.98	1.29	0
1450	2	168	92	32.5964	59	1	110	81	0	7.6	5.14	156	6.5	78	36	47	35	-3.06608	122	452	9.23	58.9021	2.27	2.59	0.93	0
1451	1	155	59	24.5578	61	1	101	67	0	10.4	4.54	128	5.79	237	12	18	108	-2.89564	57	283	5.14	100.301	1.2	3.02	0.98	0
1452	2	166	63	22.8625	75	2	123	72	0	6.2	5.82	121	6.47	228	16.2	15.6	54	-3.23492	72	307.2	7.43	91.7927	0.85	1.95	1.12	0
1453	2	165	52	19.1001	58	1	160	100	1	9.2	2.92	92	3.21	66	25.2	32.7	94	-2.63874	91	213	4.9	84.2585	0.61	1.83	1.35	0
1454	1	147	49	22.6757	68	1	132	77	0	6	4.08	123	6.21	317	21	19	101	-2.734	40	341	4.89	104.585	1.49	3.04	0.86	1
1455	1	170	65	22.4913	61	1	138	74	0	7.4	3.58	112	5.68	205	49.8	40.7	114	-2.45711	60	130.3	5.89	99.0687	1.02	2.1	1.09	0
1456	2	170	76	26.2976	36	1	125	86	0	10.8	4.84	150	7.49	198	17.9	16.6	80	-2.66759	62	370.5	6.25	122.394	4.97	3.07	0.82	1
1457	2	174	74	24.4418	76	1	130	80	0	9.5	4.18	126	2.49	134	18.5	18.4	59	-2.31653	68	259.6	6.99	92.812	1.7	2.83	0.9	0
1458	2	160	70	27.3437	64	1	144	89	1	6.7	4.1	132	4	179	13	13	63	-2.41002	58	232	5.7	104.925	0.57	1.38	1.03	0
1459	2	173	72	24.0569	61	1	126	76	0	6.5	4.06	109	4.54	147	25.9	21.4	79	-2.4938	73	310.3	6.34	99.7271	2.13	1.63	0.84	0
1460	2	176	76	24.5351	55	1	116	79	0	6.7	4.46	132	5.61	131	18.8	20.6	119	-2.7257	78	425.7	4.57	101.468	1.74	2.23	0.7	0
1461	1	153	65	27.7671	83	2	125	67	0	7.5	3.26	89	4.57	200	9	17	102	-2.59042	127	424	10.27	36.1894	1.12	0.38	0.84	0
1462	2	166	55	19.9594	49	1	104	69	0	7.8	4.12	125	6.77	179	21	15	66	-2.58518	56	227	5.5	116.412	0.75	1.2	0.77	0
1463	1	158	49	19.6283	59	1	132	79	0	5.5	4.05	93	6.82	248	17	22	42	-1.7808	59	277	7.9	100.716	1.5	4.51	1.89	0
1464	2	173	65	21.7181	67	1	135	76	0	6.1	4.34	134	5.86	170	43.6	26.3	60	-2.70271	61	319.5	6.01	101.429	0.84	1.62	1.08	0
1465	1	154	68	28.6726	70	1	132	79	0	8.7	4.1	126	7.35	135	13.9	26.8	68	-2.50526	47	307.1	6.05	99.3542	1.27	2.45	1	0
1466	2	178	82	25.8806	57	1	123	82	0	10.3	4.87	136	7.16	164	24.2	21.5	82	-2.51454	84	262.8	6.14	93.3318	1.33	2.77	0.91	0
1467	1	155	47	19.563	76	2	106	63	0	6	3.42	108	8.06	151	10	16	74	-2.28049	79	140	8.09	66.819	1.17	1.38	0.72	0
1468	2	180	77	23.7654	64	1	124	85	0	7.8	3.92	130	5.4	214	24.1	26.4	60	-2.77664	68	347.8	5.8	100.004	0.86	1.2	1.09	0
1469	2	175	69	22.5306	63	1	132	85	0	6.3	4.35	132	5.29	169	58	33	50	-2.73922	67	237	5.1	101.079	1.13	1.68	0.8	0
1470	1	157	52	21.0962	66	1	109	66	0	6.6	4.32	132	5.26	244	27	22	59	-3.09828	50	159	5.15	100.349	1.6	4.52	1.11	0
1471	1	159	70	27.6888	53	1	119	78	0	9.1	4.84	141	7.49	377	25	16	93	-3.19394	41	364	4.21	114.13	1.74	4.56	0.91	0
1472	1	151	59	25.8761	74	1	113	75	0	9.6	4.32	102	7.51	132	11.3	14	99	-2.96912	117	363.6	8.72	42.231	2.25	2.49	0.88	0
1473	2	172	75	25.3515	39	1	122	83	0	9.3	4.52	136	6.17	224	30.2	23.9	67	-2.54732	58	472.1	5.23	122.575	7.24	2.75	0.84	0
1474	1	162	62.5	23.815	66	1	133	73	0	8.8	3.44	93	3.75	160	14	17	73	-2.76979	76	298	8.15	74.488	0.65	2.19	1.21	0
1475	1	159	63	24.9199	44	1	109	72	0	10.8	4.92	151	4.8	193	9.2	11.6	78	-2.59989	52	233.5	6.67	113.981	1.07	2.1	0.92	0
1476	1	153	48	20.5049	60	1	116	87	0	8	4.69	128	4.18	146	33	20	78	-2.69506	43	251	6.74	108.02	2.75	3.61	0.87	0
1477	2	165	68	24.977	59	1	115	49	0	7.5	4.59	136	5.69	205	19	19	78	-3.32968	64	300	5.9	105.068	1.1	3.21	1.27	0
1478	1	156	48	19.7239	71	1	154	78	1	6.5	3.48	111	6.32	294	13	20	71	-3.11511	64	340	6.66	88.7446	1.74	3.77	1.35	0
1479	2	158	62	24.8358	74	1	141	91	1	9.9	3.69	110	6.59	249	14	69	124	-2.69938	50	243	4.92	103.118	0.91	2.09	1	0
1480	2	163	72	27.0993	53	1	123	103	1	7.8	4.19	132	4.05	135	30	26.6	100	-2.84286	67	367	5.9	107.565	1.45	2.77	1.41	0
1481	1	155	55	22.8928	67	1	143	75	1	6.7	4.41	128	6.73	197	24	26	85	-3.04332	63	224	6	92.7157	1.82	3.53	0.98	0
1482	2	170	80	27.6817	49	1	140	85	1	10.2	5.92	158	7.93	225	34	20	86	-2.8853	61	301	9.38	113.443	1.23	3.25	0.83	1
1483	2	183	92	27.4717	32	1	135	89	0	10.4	5.42	158	9.66	349	32.3	15.7	81	-2.59809	64	287.5	5.02	124.28	2.19	3.51	0.89	0
1484	2	174	92	30.3871	53	1	139	98	1	9.4	4.36	136	7.66	255	32.6	24.3	108	-2.62824	73	310.7	6.03	104.814	5.06	3.7	1.04	0
1485	1	146	59	27.6787	52	1	132	88	0	6.6	4.74	131	5.86	245	21	22	72	-3.24281	45	389	6.3	112.294	1.38	2.88	1.26	1
1486	1	147	40.5	18.7422	60	1	129	85	0	5.2	3.47	114	8.69	218	11	15	48	-2.44207	37	224	4.7	112.004	0.56	1.13	1.46	0
1487	1	162	67	25.5296	48	1	132	99	1	10.9	5.3	140	5.17	312	52	29	137	-2.98422	53	325	4.07	110.671	2.24	4.44	0.89	0
1488	2	171	71	24.281	51	1	159	98	1	9	4.45	139	7.6	143	10.4	17.1	80	-2.76566	88	459.6	8.58	91.6203	2.96	1.88	0.98	0
1489	1	156	65	26.7094	64	1	111	78	0	7.2	4.16	120	7.04	89	18	48	70	-2.68742	52	243	4.7	100.649	1.65	8.21	1.36	0
1490	2	180	88	27.1605	44	1	146	92	1	11.1	5.28	159	5.94	167	46.5	35.7	115	-2.56122	78	359.7	5.16	108.653	2.11	2.19	0.75	1
1491	2	160	67	26.1719	76	1	168	89	1	9.6	3.48	113	4.15	182	10.1	18.1	70	-2.31994	74	308.8	9.35	90.4719	0.8	2.27	1.09	1
1492	2	175	87	28.4082	55	1	119	76	0	7.1	4.36	135	10.72	321	18	16	88	-3.72134	78	533	4.99	101.468	2.01	3.09	1.07	0
1493	1	155	45	18.7305	60	1	120	74	0	6.7	3.85	117	4.67	160	8	14	46	-2.99652	47	315	4.24	105.73	1.13	2.53	1.67	0
1494	1	158	70	28.0404	65	2	138	77	0	6.4	4.13	120	7.05	301	41	29	46	-3.39134	41	334	5.7	105.922	1.21	2.36	1.28	0
1495	2	168	71	25.1559	56	1	111	86	0	7.3	4.3	132	9.25	213	25	20	82	-2.79402	52	411	5.23	113.975	1.08	1.49	1.21	1
1496	1	150	66	29.3333	69	1	158	76	1	7.5	4.38	131	5.53	184	15	10	93	-2.35428	71	247	6.67	79.3322	2.25	3.38	0.8	0
1497	1	157	57	23.1247	60	1	138	72	0	10.7	4.15	121	5.25	196	10	13	86	-2.57351	39	130	4.59	110.592	0.97	9.24	1.41	1
1498	1	160	66	25.7812	66	1	145	91	1	8.9	3.91	123	7.15	263	15	18	116	-2.83423	81	338.1	8.5	69.005	2.6	2.03	0.99	1
1499	2	168	68	24.093	72	1	143	78	1	10.8	4.26	133	5.67	225	20.3	16.7	83	-2.49176	62	242.2	5.19	97.8416	2.12	2.61	0.99	0
1500	1	155	80	33.2986	59	1	123	104	1	8.5	4.75	145	8.33	176	15	27	68	-2.69909	56	361	5.48	101.99	1.68	3.25	1.08	0
1501	2	175	88	28.7347	54	1	122	85	0	6.7	4.82	152	9.58	169	29	25	97	-2.97624	110	454	6.6	68.8013	3.18	2.31	0.84	0
1502	2	173	89	29.737	57	1	158	91	1	7.5	4.64	125	8.14	238	22.7	17.6	80	-2.35367	104	515.3	12.62	72.2312	2.82	2.6	0.73	0
1503	2	175	68	22.2041	46	1	135	95	1	8.9	4.47	134	4.49	198	17.3	13.5	64	-2.73596	78	401.8	8	107.31	3.92	2.81	0.85	0
1504	2	178	96	30.2992	39	1	150	90	1	11.5	4.24	134	4.2	119	36	28	59	-2.84765	59	391	7.03	121.944	21.44	0.59	0.31	1
1505	2	166	72	26.1286	61	1	157	95	1	6.2	4.29	134	6.02	165	40	20	68	-2.93074	62	321	6.97	104.769	4.53	1.7	0.74	0
1506	2	180	84	25.9259	44	1	152	108	1	9	5.37	166	7.76	174	26	22	102	-2.81064	109	371	6.11	74.0229	2.63	2.74	0.76	1
1507	2	176	67	21.6296	72	1	156	79	1	9.1	5.3	153	5.63	88	28	22	71	-3.00468	81	359	10.46	88.8112	1.73	1.35	0.71	0
1508	2	174	51	16.845	66	1	102	62	0	7.7	3.12	94	9.63	351	8	10	76	-2.83742	61	357	6.59	102.062	0.62	2.14	0.88	0
1509	1	165	62	22.7732	57	1	138	92	1	7.9	3.55	104	8.05	220	58	21	325	-1.94456	29	200.1	3.1	121.014	0.8	2.1	1.12	0
1510	1	160	67	26.1719	67	1	203	119	1	7.2	4.09	123	7.1	246	11	14	53	-2.78786	58	367	6.8	96.223	1.14	1.98	1.05	0
1511	1	157	72	29.2101	64	1	147	90	1	7.1	3.81	117	3.77	110	23	28.3	68	-2.45049	40	163	4.72	107.219	0.81	1.38	1.26	0
1512	1	148	50	22.8269	65	1	123	75	0	6.2	3.28	101	8.69	285	35.5	34.1	141	-2.41941	72	411.4	7.49	79.9769	1.58	3.5	0.74	0
1513	2	180	83	25.6173	49	1	116	83	0	8.7	4.35	137	6.04	246	18	17	99	-3.32958	49	267	4.9	121.202	3	1.59	0.8	0
1514	1	158	78.5	31.4453	64	1	99	67	0	8.7	4.4	135	12.23	168	23	16	40	-2.56598	51	406	6.7	101.122	1.78	3.84	1.84	0
1515	2	168	85	30.1162	70	1	137	84	0	10.8	5.12	153	4.44	146	13.7	16.2	129	-2.26936	63	224.3	6.49	98.5886	0.5	1.3	0.73	0
1516	2	171	71	24.281	31	1	165	106	1	6.9	4.81	150	8.39	182	50	41	66	-3.23078	64	469	4.34	125.055	1.17	1.73	0.6	0
1517	2	168	67	23.7387	52	1	134	82	0	8.1	4.93	151	7.79	257	14.2	15.6	92	-2.28288	63	311.4	4.69	110.267	1.02	2.98	0.92	0
1518	1	157	44.5	18.0535	63	1	124	84	0	7.1	4.36	133	6.17	254	13.7	18.5	59	-2.65059	35	210.3	4.44	111.416	0.92	3.32	1.21	0
1519	2	160	60	23.4375	57	1	118	78	0	6.8	4.18	128	6.28	146	33	23	61	-2.43616	61	261	8.83	107.937	1.11	1.91	1.05	0
1520	1	163	65	24.4646	58	1	132	77	0	6.5	4.02	121	10.28	273	30	22	92	-3.37496	56	348	6.7	102.627	2.74	1.2	0.81	0
1521	1	162	77	29.34	54	1	122	80	0	12	4.58	127	5.27	155	23.2	26.4	106	-2.8003	37	309.8	3.73	116.263	2.36	2.91	0.96	0
1522	1	153	51	21.7865	81	1	121	68	0	6.9	3.4	99	4.35	133	18	21.8	71	-2.22494	59	164	3.21	87.8366	3.6	1.19	0.46	0
1523	2	179	80	24.968	60	1	146	82	1	9.1	4.77	146	5.35	188	11	13	111	-3.19974	76	278	5.5	99.1361	1.65	1.86	1.01	0
1524	1	148	64	29.2184	79	1	120	81	0	7.6	4.83	133	4.92	164	9.2	17.2	79	-2.32789	91	358	10.53	55.3477	1.14	3.7	1.67	0
1525	2	173	87	29.0688	55	1	139	95	1	7.8	5	148	8.71	170	47	25	81	-2.58186	66	495	4.81	106.719	2.79	3.01	0.53	0
1526	1	158	54	21.6311	70	1	90	58	0	10.6	3.13	96	7.81	127	15	14	38	-2.85266	65	307	10.7	87.6522	1.73	1.06	0.9	0
1527	2	167	74	26.5338	52	1	140	98	1	7	4.96	146	5.47	209	20	16	54	-3.35247	72	299	7.7	105.909	2.12	1.97	1.1	0
1528	1	160	60	23.4375	78	1	112	63	0	8.6	3.75	117	7.62	124	17.2	23.6	70	-2.87052	79	351.2	8.54	65.993	1.73	1.93	1.05	0
1529	2	176	75	24.2123	49	1	133	86	0	6.8	4.65	142	5.29	209	13	14	35	-2.56483	67	307	4.69	110.274	1.03	1.87	0.88	0
1530	2	170	81	28.0277	50	1	164	97	1	10.7	4.8	142	6.27	111	19	17	87	-3.01892	51	370	4.18	119.004	2.66	1.18	0.58	0
1531	1	148	60	27.3923	77	1	130	82	0	11.3	3.98	123	7.01	157	14	14	62	-2.8883	94	400	11.5	53.9012	1.02	1.39	0.97	0
1532	1	148	40	18.2615	84	1	129	76	0	7.4	4.01	132	7.37	199	18	16	60	-2.98471	43	488	6.14	93.0426	1.08	3.1	1.69	0
1533	2	171	80	27.3588	45	1	125	85	0	7	5.19	163	8.14	228	25.1	20.1	77	-3.01353	70	432.7	8.16	111.566	1.15	2.18	0.63	0
1534	2	175	78	25.4694	73	1	142	69	1	8.7	3.24	98	5.85	156	11.2	12	84	-2.3613	174	589.3	14.06	35.2606	4.85	2.84	0.76	0
1535	2	173	70	23.3887	56	1	137	80	0	8.9	4.19	137	6.84	215	14	11	88	-3.0847	46	273	4.88	118.274	1.61	1.48	0.56	0
1536	2	155	70	29.1363	55	1	151	95	1	7.5	4.59	140	6.87	270	13	14	93	-2.77138	88	354	7.5	89.3691	1.15	1.42	0.78	0
1537	1	160	65	25.3906	68	1	149	85	1	6.5	4.24	130	8.22	191	34	28	142	-3.1064	53	240	3.9	97.7268	2.27	2.63	0.71	0
1538	2	170	65	22.4913	63	1	159	83	1	10.1	5.05	154	6.45	149	15	22	128	-2.90682	57	299	5.32	106.135	1.44	1.85	0.72	0
1539	2	170	94	32.526	42	1	203	111	1	7.6	5.24	156	9.53	136	26	18	89	-2.99972	96	364	7.65	87.2879	2.52	2.93	0.67	0
1540	1	165	70	25.7117	53	1	167	86	1	10.3	4.51	126	5.09	234	19	15	85	-2.93726	49	258	4.45	109.331	1.91	4	0.76	0
1541	2	173	68	22.7204	61	1	131	82	0	13.3	4.99	153	3.8	209	14.3	9	81	-2.56338	59	263.1	5.51	106.35	1.62	3.36	0.92	0
1542	1	156	60	24.6548	72	1	145	91	1	9.1	3.55	93	6.71	181	10.6	17.9	87	-2.06066	100	545.9	11.52	51.6246	1.84	1.17	0.7	0
1543	1	160	60	23.4375	82	1	131	87	0	12.1	4.09	121	4.71	151	9.2	14.3	96	-2.34291	55	250	5.5	88.7815	1.03	2.76	1.34	0
1544	1	154	61	25.721	65	1	110	68	0	7.9	4.51	128	4.55	177	24.5	20.5	96	-2.62642	44	223.2	4.87	104.135	2.16	1.84	0.96	0
1545	2	170	72	24.9135	49	1	135	97	1	6.4	4.74	145	6.17	263	45	23	82	-3.10864	88	389	5.91	92.767	9.16	2.79	1.01	0
1546	1	155	52	21.6441	70	1	133	70	0	6.7	4.48	129	4.81	197	8	12	81	-2.91259	52	192	4.64	96.9628	2.6	3.32	1.05	0
1547	2	178	91	28.7211	59	1	128	73	0	6.5	4.61	143	5.57	154	18	16	60	-2.64246	65	389	8.93	104.578	1.7	2.34	1.08	1
1548	2	176	76	24.5351	51	1	143	96	1	6.1	5.2	162	5.78	263	24	18	53	-3.23174	62	340	5.95	111.492	2.88	1.53	0.81	1
1549	1	162	60	22.8624	68	1	128	82	0	8.8	4	117	3.78	144	26.1	28.3	98	-2.78824	45	256.9	4.5	101.658	4.75	3.86	1.39	0
1550	2	176	62	20.0155	66	1	100	68	0	8.1	4.5	136	7.5	208	22.2	18.8	52	-2.13599	60	386.4	7.7	102.572	0.95	2.16	1.29	0
1551	2	170	75	25.9516	74	1	136	84	0	7.4	4.81	139	7.71	265	61	36	85	-2.83163	72	379	5.83	92.3654	2.78	2.55	1.12	1
1552	2	175	79	25.7959	43	1	132	94	1	6.7	4.74	143	6.06	177	192.5	80.2	68	-2.55351	61	385.2	6.91	117.757	1.86	1.96	0.92	1
1553	1	162	60	22.8624	71	1	162	91	1	6.7	4.04	123	9.48	308	18.3	21.9	132	-3.06303	155	659.7	11.66	30.7015	2.74	3.09	0.98	0
1554	1	160	70	27.3437	71	1	132	81	0	7.2	3.57	100	6.63	240	13.7	14.1	92	-2.77722	73	515.5	7.87	75.7827	2.68	2.5	1.01	1
1555	2	163	60	22.5827	35	1	104	70	0	6.8	5.41	156	7.35	235	32	19	61	-3.05081	47	322	5.86	133.903	1.58	2.21	0.82	0
1556	2	178	85	26.8274	60	1	134	93	1	6.9	4.22	134	8.58	262	20	20	75	-2.99574	75	211	5	99.5335	1.1	2.94	1.09	0
1557	2	171	96	32.8306	46	1	130	95	1	9.9	5.68	171	9.27	232	104	58	138	-3.23842	67	511	4.41	112.351	1.83	4.25	0.58	0
1558	2	168	98	34.7222	38	1	125	81	0	8.1	5.48	165	10.91	174	80	38	104	-3.3157	56	368	4.4	124.654	1.84	3.37	0.74	0
1559	2	165	75	27.5482	66	1	134	81	0	6.3	4.09	120	5.92	209	19	16	50	-3.02924	59	221	6	103.094	0.61	1.72	0.88	0
1560	2	170	59	20.4152	61	1	149	88	1	9.2	4.18	118	5.97	139	21	18	84	-2.717	86	420	11.43	88.5039	1.69	1.57	0.78	0
1561	1	160	65	25.3906	65	1	135	80	0	7.8	4.28	130	6.05	147	28.3	21.1	87	-2.75406	64	342	4.8	92.1187	1.2	1.46	1.07	0
1562	2	178	73	23.04	61	1	130	72	0	9	4.09	137	3.93	191	24.8	20.8	102	-2.9519	76	261	4.8	98.5215	0.51	1.38	0.76	0
1563	2	172	65	21.9713	48	2	122	87	0	6	4.42	137	8.5	275	20.4	21.6	76	-2.638	68	458.5	8.4	110.467	2.03	4.08	1.25	0
1564	2	170	74	25.6055	74	1	121	64	0	11.2	4.21	125	7.64	184	13.6	12.3	76	-2.06278	62	262.4	3.8	96.6321	0.97	2.63	0.92	1
1565	2	172	70	23.6614	90	1	159	77	1	9.1	4.06	118	8.54	201	20.8	23.7	69	-1.88326	68	220.2	9.88	85.0726	1.37	3.69	1	0
1566	1	160	60	23.4375	90	1	154	76	1	10.3	3.74	117	5.45	132	6	12	84	-2.35522	40	193	6.26	91.2106	1.43	2.15	0.97	0
1567	2	160	78	30.4687	59	2	154	97	1	6.8	3.66	112	8.18	182	15.9	17.1	73	-2.34282	147	431.4	11.87	47.0958	2.47	2.01	0.81	0
1568	2	167	73	26.1752	53	1	189	107	1	9.6	4.31	126	7.38	249	15.5	16.3	51	-2.42872	82	406.1	8.95	98.49	1.3	1.78	1.19	0
1569	2	176	85	27.4406	50	1	133	88	0	7.5	4.96	131	4.56	189	38	25	80	-2.9849	34	437	4.03	134.506	1.75	1.77	0.49	0
1570	1	155	57	23.7253	73	1	190	85	1	7.8	4.01	119	5.86	174	20	21	124	-2.99544	64	345	5.22	87.6475	1.36	3.31	1.26	0
1571	1	152	46	19.91	69	1	158	79	1	13.3	4.5	133	4.65	231	14	15	63	-2.55622	34	320	4.39	108.088	1.35	3.19	0.86	1
1572	2	170	66	22.8374	74	1	112	77	0	8.6	3.96	119	4.44	206	20	25.5	84	-1.94529	67	231	6.3	94.395	0.78	1.28	0.55	0
1573	2	169	63	22.0581	64	1	147	77	1	6.3	3.89	116	4.52	127	22.6	19.5	67	-2.35052	76	250	6.15	96.7003	0.92	1.95	0.96	0
1574	2	168	75	26.5731	65	1	119	57	0	6	3.62	114	6.23	156	20	28	73	-2.50999	186	577.4	15.7	34.2091	1	3.16	0.85	1
1575	2	167	80	28.6851	54	1	149	90	1	9.1	4.2	136	10.43	246	15	16	66	-2.69624	90	435	8.99	87.534	1.93	2.27	0.62	1
1576	2	178	93	29.3524	49	1	114	85	0	10.7	4.95	144	5.73	147	26.8	18.2	89	-2.65618	69	260.4	8.49	109.299	1.73	1.93	0.8	0
1577	1	161	67	25.8478	32	1	97	75	0	8.8	4.72	131	6.98	259	19.8	21.8	53	-2.24598	40	456.2	4.22	130.829	2.81	2.9	1.03	0
1578	1	160	50	19.5312	72	1	159	86	1	7.9	4.08	125	6.48	152	15	16	93	-3.14711	46	168	3.5	98.636	1.79	2.87	1.21	0
1579	2	172	55	18.5911	57	0	127	80	0	7.2	2.54	79	11.72	347	35	31	142	-1.52944	65	129	5.7	105.887	0.79	0.83	0.61	0
1580	1	152	53	22.9398	57	2	136	87	0	8.1	4.79	143	6.9	180	34	30	119	-2.6389	86	502	12.2	67.9162	1.44	2.64	0.95	0
1581	2	177	85	27.1314	75	1	136	91	1	10.6	4.71	142	6.89	205	16	70	58	-2.44438	77	256	6.6	89.9503	1.93	2.2	1.16	0
1582	2	172	120	40.5625	45	1	137	93	1	5.4	5.38	162	7.02	266	37.5	23.8	74	-2.52699	56	323.5	6.19	119.344	2.15	2.63	1.09	0
1583	1	160	75	29.2969	76	1	150	78	1	7.9	3.01	79	8.2	224	6	14	75	-1.73638	122	444	9.7	39.6662	2.14	2.01	0.7	0
1584	2	165	48	17.6309	75	1	135	84	0	10.1	4.39	134	8.18	180	11	22	68	-2.4311	46	181.4	5.4	105.092	1.22	2.46	1.31	0
1585	2	168	74	26.2188	77	1	187	101	1	7.4	4.6	143	5.95	87	27	20	70	-2.75982	79	382	4.68	88.153	0.76	2.07	0.56	1
1586	1	155	67	27.8876	69	1	143	74	1	8.4	3.68	107	6.34	232	20	22	99	-2.64246	68	400	6.75	83.5505	1.14	3.25	0.99	0
1587	1	158	70	28.0404	55	1	115	73	0	7.5	4.07	123	3.11	109	38	26	82	-2.37344	36	173	6.78	116.308	2.15	0.93	0.58	0
1588	1	150	62	27.5556	80	1	146	68	1	7.5	3.89	118	8.74	241	24	22	57	-2.87094	80	498	9.08	64.2008	1.28	1.08	1.13	0
1589	2	172	67	22.6474	60	1	130	68	0	10.1	3.95	128	7.09	225	9.5	11	70	-2.22948	62	235.5	6.51	105.423	0.83	3.01	1.08	0
1590	2	168	75	26.5731	55	1	122	76	0	7.7	3.89	120	7.74	194	18.2	21.7	67	-2.50686	150	212.5	5.79	47.1256	0.75	1.96	1.01	0
1591	2	170	75	25.9516	54	1	142	70	1	7.6	4.31	130	7.93	210	16	13	157	-2.9261	69	348	6.9	105.953	1.46	3.19	1.06	0
1592	2	170	74	25.6055	59	1	132	82	0	6.4	4.68	145	5.1	136	22	25.9	61	-3.2916	56	326.8	3.94	109.392	1.45	2.69	1.36	0
1593	2	171	70	23.939	70	1	144	85	1	6.8	4.14	122	7.51	247	12.2	17	61	-2.37626	96	343.3	5.17	73.3375	2.35	2.87	0.71	0
1594	1	158	47	18.8271	66	1	142	93	1	6.1	3.78	108	4.04	168	13.1	19.2	48	-2.5152	48	230.9	6.63	101.341	0.9	2.23	1.03	0
1595	2	172	75	25.3515	48	1	160	94	1	7.2	4.67	151	10.34	160	19	16	71	-2.8293	74	334	5.27	107.682	2.07	4.26	0.75	0
1596	1	156	55	22.6003	73	1	161	77	1	6.5	4.07	132	7.42	130	45.6	31.6	72	-2.723	55	451.8	5.61	93.8926	1.29	3.15	1.42	0
1597	1	160	80	31.25	43	1	150	90	1	7.8	4.63	145	12.21	270	69	38	66	-2.65909	49	342	6.59	116.346	1.49	2.61	0.67	1
1598	2	175	78	25.4694	52	1	121	81	0	11.1	4.61	146	7.51	181	11	15	66	-2.85774	50	419	5	118.238	2.22	1.62	0.81	1
1599	1	162	55	20.9572	65	1	119	69	0	9.6	4.01	128	2.96	134	14	15	54	-2.65398	37	236	5.92	108.575	0.65	1.25	1.17	0
1600	2	183	80	23.8884	33	1	103	73	0	12	4.39	131	10.38	164	29	170	168	-2.53412	50	311	3.7	133.069	1.29	2.33	1	0
1601	1	165	66.5	24.4261	60	2	128	84	0	7.4	3.71	115	4.4	286	10.1	19.5	108	-2.41003	56	371.3	4.87	101.358	1.24	3.07	1.23	0
1602	2	171	72	24.623	84	1	129	76	0	7.7	3.33	101	9.2	362	17.3	16	101	-2.32786	120	364	7.03	51.4304	2.11	2.05	0.97	0
1603	1	152	61	26.4024	69	1	185	91	1	9.5	3.93	115	6.49	186	18	17	105	-2.79444	50	464	7.94	98.4943	3.41	1	0.55	0
1604	1	159	70	27.6888	83	1	155	91	1	9.5	3.63	119	3.63	134	10.6	14.4	58	-2.27812	67	242.5	5.54	77.9571	0.89	2.03	1.15	0
1605	2	169	63	22.0581	67	1	99	63	0	7.6	4.43	128	3.58	198	11	18.6	60	-2.32566	121	486	12.19	56.5994	1.02	3.24	0.85	0
1606	2	170	66	22.8374	59	1	130	83	0	8.8	3.67	98	6.56	495	12	13	91	-3.05764	54	364	6.3	110.6	1.71	3.05	1.26	0
1607	2	173	78	26.0617	59	1			0	9.3	4.88	159	4.32	220	17	16.7	89	-2.6074	63	111.3	7.22	105.569	2.81	2.9	1.15	0
1608	1	153	70	29.903	55	1	170	90	1	11.1	4.14	119	5.81	183	14	12	89	-2.86966	33	164	5.3	118.772	2.16	3.21	1.26	0
1609	2	179	89	27.7769	42	1	145	92	1	6.4	4.83	160	5.67	164	28.4	24.8	52	-3.11078	48	449.8	2.68	127.386	1.43	2.6	1.4	0
1610	2	160	57	22.2656	49	1	108	68	0	6.7	3.4	70	7.69	393	4	5	93	-3.36688	71	393	11.8	108.36	1.59	1.06	0.81	0
1611	2	172	80	27.0416	39	1	135	92	1	6.1	5.23	147	5.53	193	26	19	81	-3.06029	59	400	4.98	121.944	2.05	1.56	1.2	0
1612	1	160	53	20.7031	75	1	137	79	0	7.8	3.76	117	3.7	121	20.5	23	66	-2.22596	53	293.5	5.1	93.5635	1.49	2.64	1.33	0
1613	2	173	70	23.3887	54	1	153	99	1	7.8	4.34	146	5.49	227	36.9	35.6	82	-2.55517	45	322.4	3.48	120.552	1.59	2.86	1.38	1
1614	2	175	75	24.4898	63	1	116	86	0	7.6	4.1	128	6.75	172	57	25	88	-2.309	71	496	6.22	99.3241	0.82	1.47	0.61	0
1615	2	160	55	21.4844	80	1	186	96	1	14.1	4.28	127	4.27	129	15.9	14.9	86	-1.88432	72	191	9.28	88.9822	0.36	1.06	1.14	1
1616	1	162	90.5	34.4841	37	1	128	86	0	8.4	4.73	138	5.24	176	150.2	110.6	84	-2.57676	51	460.9	3.42	119.611	4.33	3.99	0.9	0
1617	1	153	56	23.9224	61	1	122	82	0	7.5	3.54	103	8.25	189	89	23	164	-2.61998	93	418	7.6	60.3098	0.85	0.95	0.75	0
1618	1	160	63	24.6094	57	1	124	81	0	10.7	4.31	126	7.05	288	27.8	24.6	92	-2.79162	71	578.5	6.21	85.4795	3.44	2.29	0.94	1
1619	2	161	66	25.462	67	1	125	82	0	6.4	4.92	152	4.5	167	18.4	20.6	61	-2.51544	93	445.2	9.07	77.6202	1.39	1.84	0.97	1
1620	1	169	62	21.7079	58	1	153	81	1	8.9	4.61	123	8.28	315	114.7	97.4	164	-3.16504	55	376.5	4.07	103.073	3.22	3.54	1.13	0
1621	1	158	67	26.8386	44	1	119	83	0	9.6	4.25	96	3.17	180	22	16	48	-2.73715	42	239	5.02	120.001	1.37	2.62	0.95	0
1622	2	167	87	31.1951	75	1	158	81	1	10.4	4.16	130	7.24	291	6.4	11.5	66	-2.5823	54	167.4	4.94	100.124	0.62	2.18	1.15	0
1623	2	173	61	20.3816	89	1	129	76	0	7.5	3.74	115	4.75	191	5	13.6	43	-2.6442	68	507.2	10.37	85.6034	0.94	3.24	0.83	0
1624	2	170	77.4	26.782	50	1	130	95	1	10.2	5.19	151	4.52	233	12	10	78	-3.04623	51	234	5.2	119.004	2.34	2.63	0.76	0
1625	1	155	60	24.974	59	1	125	71	0	6.4	3.57	103	5.33	101	25	26	99	-3.19838	119	252	11.6	45.4269	1.5	3.1	1.13	0
1626	2	174	73	24.1115	61	1	125	86	0	6.8	4.58	144	5.87	212	23	23	43	-2.59127	58	260	7.99	106.901	0.72	1.06	1.15	0
1627	2	173	60	20.0474	60	1	94	63	0	11.3	4.28	125	4.02	101	22	25	54	-2.26832	67	269	8.47	102.982	1.2	1.42	0.93	1
1628	2	173	74	24.7252	73	1	163	88	1	14.4	4.63	137	4.97	165	20	21	88	-3.11792	81	226	6.8	88.2605	0.81	3.86	1.4	0
1629	1	160	55	21.4844	55	1	105	70	0	6.1	3.54	107	5.78	259	14	14.6	55	-2.47239	39	383.1	4.13	114.086	1.12	3.03	1.79	0
1630	1	160	46	17.9687	65	1	135	85	0	6.4	3.35	110	3.45	135	16	13	75	-3.14697	90	191	7.2	61.1889	1.1	2.65	1.2	0
1631	2	175	69	22.5306	65	1	134	89	0	8.4	4.69	139	7.26	210	43	28	105	-2.28586	76	189	5.16	96.1008	2.3	1.71	0.77	1
1632	1	155	64	26.6389	68	1	145	72	1	8.6	4.68	140	5.8	125	16	16	102	-3.16994	51	218	5.8	98.6369	2.6	2.05	0.83	0
1633	2	163	63	23.7118	48	1	159	95	1	6.8	5.47	154	6.51	177	16	19	86	-3.30621	63	329	4.4	113.044	3.44	1.33	0.92	0
1634	2	175	65	21.2245	44	1	114	76	0	11.8	4.66	139	6.56	255	22	17	79	-2.97214	55	245	5.91	120.744	0.69	1.9	0.99	0
1635	2	166	69	25.0399	67	1	136	81	0	7.9	4.06	115	4.87	215	26.9	18.4	83	-2.83871	103	453.8	11.33	68.6673	1.71	1.18	0.78	0
1636	1	162	81	30.8642	63	1	136	91	1	9.9	4.48	130	6.47	192	37.8	24.3	143	-2.66938	52	419.3	4.98	101.277	3.46	4.6	1.28	0
1637	1	155	57	23.7253	61	1	122	76	0	10.9	4.67	136	5.27	204	10.9	13.6	80	-2.5732	61	212	6	98.6749	2.09	3.32	1.29	0
1638	2	180	66	20.3704	69	1	145	70	1	6	3.03	95	5.22	178	30.9	23.1	58.6	-2.70284	101.5	364.8	15.66	69.0229	0.88	1.26	0.57	0
1639	2	175	70	22.8571	52	1	106	83	0	8.1	4.82	156	6.8	125	25	23	88	-2.69389	65	332	4.54	109.231	2.14	1.64	0.68	0
1640	2	168	61	21.6128	52	1	129	81	0	5.6	4.08	121	4.94	169	21.1	19.9	91	-2.55323	82	393.3	4.74	99.1044	1	1.9	0.95	1
1641	1	150	41	18.2222	60	1	130	79	0	5	3.4	108	7.11	221	10	12	52	-2.38257	34	210	6.83	114.31	0.71	1.14	1.76	0
1642	2	178	60	18.937	81	1	142	84	1	9.2	3.62	106	4.61	139	20	14	75	-2.44888	74	183	6.17	87.7018	0.79	1.49	0.48	0
1643	2	169	65	22.7583	60	1	109	81	0	6.5	4.03	139	4.41	123	24	17	38	-3.11404	78	366	8.02	98.3615	0.61	1.58	1.19	0
1644	1	158	59	23.634	62	1	132	80	0	5.4	2.92	89	5.57	293	11	14	66	-1.83054	125	549.8	11.2	42.0315	2	2.55	1.38	0
1645	2	175	77	25.1429	63	1	155	85	1	11.5	3.95	112	8.09	220	17	20	122	-2.75724	84	329	3.97	89.9132	1.06	1.84	0.91	1
1646	2	168	77.5	27.4589	72	1	156	91	1	7.3	2.94	90	7.18	188	13	12	67	-2.2262	137	493	13.87	47.2699	1.02	2.58	0.67	1
1647	1	157	60	24.3418	48	1	126	85	0	8.6	3.87	111	6.9	264	22	21	72	-2.93274	36	310	4.17	121.483	3.95	2.15	0.86	1
1648	2	168	65	23.03	65	1	149	83	1	6.8	4.28	139	5.19	237	25	12	68	-3.21562	70	278	6.5	98.5174	0.78	2.19	1.27	0
1649	2	174	84	27.7447	50	1	174	106	1	13.4	4.74	144	8.44	256	25	20	66	-3.07174	68	435	6.49	109.101	1.88	3.65	1.02	0
1650	1	158	53	21.2306	52	1	108	78	0	8.3	4.31	132	4.03	229	28	29	95	-2.96824	37	177	5.59	117.718	1.08	2.86	1.29	0
1651	2	181	79	24.114	50	1	117	87	0	9.4	4.5	140	5.96	194	39.1	20.7	83	-2.40964	90	341.2	4.41	89.7389	1.74	2.78	0.97	0
1652	2	178	68	21.4619	72	1	120	76	0	9.5	4.2	137	4.3	127	11.8	16	64	-2.14446	77	233.1	5.85	91.6443	0.8	1.96	1.32	1
1653	2	174	66	21.7994	62	1	130	80	0	6.8	4.04	130	5.17	127	20.2	23.5	54	-2.66638	86	397.8	4.65	87.9552	0.7	0.99	0.97	0
1654	2	170	68	23.5294	69	1	120	81	0	6.8	4.47	135	4.17	117	35.4	31.1	79	-2.51742	65	246.7	7.78	98.2718	7.85	3.12	0.74	0
1655	1	145	58	27.5862	79	1	136	69	0	6.2	3.96	123	5.76	143	21	25	117	-3.12	63	219	8.6	86.048	1.25	2.21	1.7	0
1656	2	173	78	26.0617	67	1	154	72	1	7.2	4.13	126	9.59	100	83.1	53.6	91	-2.40188	54	323.6	7.52	105.232	1.19	3.31	1.1	0
1657	1	160	60	23.4375	49	1	160	100	1	10	4.99	141	6.4	230	15.1	20.8	129	-2.78942	57	418.8	4.37	108.073	11.17	2.91	0.91	0
1658	2	171	69	23.597	56	1	153	108	1	10.8	4.5	140	7.83	152	28	18	142	-3.05086	35	257	6.04	128.45	1.44	3.44	0.94	0
1659	1	145	58	27.5862	77	1	132	82	0	6.2	4.11	142	5.18	164	14	18.3	86	-2.86256	57	269.7	5.57	90.8007	0.67	1.98	1.58	0
1660	1	163	61.5	23.1473	66	1	130	80	0	7.7	3.88	117	4.77	146	22	13.8	114	-2.46918	71	397.6	6.1	80.8263	2.05	2.27	1.23	0
1661	1	152	57	24.6711	60	1	121	80	0	6.3	4.02	112	4.03	231	15	18	80	-3.11424	39	258	6.3	110.592	1.55	1.71	0.82	0
1662	2	168	68	24.093	67	1	153	71	1	7.2	4.48	138	6.23	263	28	24	55	-3.05523	67	288	5.78	98.5953	2.05	3.91	0.73	1
1663	2	174	60	19.8177	58	1	155	91	1	7.5	4.68	146	15.59	234	19.6	33.9	101	-2.31761	73	497.6	11.21	101.605	0.68	2.18	1.31	0
1664	2	170	67	23.1834	55	1	143	90	1	9.5	4.8	150	7.57	245	20.2	24.1	73	-2.87956	69	400.5	7.48	105.296	1.93	4.08	0.93	0
1665	2	181	100	30.5241	33	1	140	90	1	10.5	5.4	164	7.68	271	87	44	111	-2.86474	81	311.1	5.5	113.19	6.31	3.57	0.94	0
1666	2	184	80	23.6295	64	1	179	92	1	7.1	4.39	123	5.46	301	6	11	83	-2.58317	102	365	7.41	70.7844	0.66	2.21	0.8	0
1667	1	160	76	29.6875	70	1	138	84	0	7.2	3.83	113	5.94	152	17	18	66	-2.3984	87	428	6.31	61.7782	1.42	2.17	0.83	0
1668	2	170	62.5	21.6263	60	1	117	74	0	9.3	3.42	112	7.88	167	16	33	57	-2.08139	85	475	9.53	90.3148	0.85	2.68	1.02	0
1669	2	180	75	23.1481	33	0	120	74	0	5.6	4.57	138	7.82	270	148.4	59.1	47	-3.45678	70	430.9	3.82	120.211	3.14	2.16	0.78	0
1670	2	178	103	32.5085	63	1	126	88	0	7.5	4.75	151	7.06	243	20	19	41	-3.36811	49	332	7.2	111.095	1.87	1.9	1.07	0
1671	2	170	70	24.2215	56	1	124	87	0	8	4.37	135	5.74	155	52.9	29.3	79	-2.44543	65	371.7	8.03	106.547	0.93	1.61	0.84	0
1672	2	173	78.56	26.2488	52	1	114	78	0	11.5	4.37	136	6.05	200	12.8	12	81	-2.1933	66	595.7	5.81	108.729	1.16	3.67	0.89	1
1673	2	168	75	26.5731	70	1	118	90	1	7.3	4.96	148	4.47	100	14.6	21.6	99	-2.72042	166	296.9	9.83	38.0121	2.77	2.56	0.77	0
1674	1	158	50	20.0288	57	1	124	72	0	7.5	4.31	134	7.07	207	16.7	12.6	71	-2.58961	41	298.4	6.16	111.325	3.5	2.97	0.95	0
1675	1	158	55	22.0317	56	1	115	73	0	6.4	3.67	116	3.63	226	8	15	78	-2.59167	60	240	7.99	102.198	1.54	2	0.76	0
1676	2	172	74	25.0135	58	1	149	89	1	7.2	4.98	145	7.65	281	33.4	22.2	76	-2.59236	75	307.5	4.96	100.779	1.74	3.13	0.83	0
1677	2	168	80	28.3447	66	1	146	82	1	7.4	4.72	138	7.45	149	26.3	33.5	136	-3.1017	49	392.8	5.29	109.042	1.89	2.35	0.92	0
1678	2	167	63	22.5896	52	2	149	97	1	7	4.44	138	5.45	228	9.2	13.7	74	-2.87355	57	236.5	5.64	113.651	1.26	2.74	2.23	0
1679	2	174	71	23.4509	56	1	144	88	1	5.8	5.15	144	5.88	201	11	20.2	77	-2.38898	83	364.8	5.28	95.2735	0.95	3.07	0.98	0
1680	1	160	50	19.5312	76	1	139	73	0	7.2	3.88	118	6.27	181	11	16	53	-2.52479	64	312	6.49	86.0274	2.06	1.9	0.74	0
1681	2	175	73	23.8367	72	1	139	93	1	10.2	4.41	138	4.86	187	17	14	88	-2.46358	51	242	4.48	103.786	1.48	2.48	0.57	0
1682	1	152	57	24.6711	63	1			0	10.6	3.82	119	5.57	131	15.2	16.6	113	-2.6648	46	299	5.93	104.314	2.79	3.21	1	0
1683	2	178	80	25.2493	32	1	133	89	0	11.5	5.27	161	8.58	181	27.2	15.4	102	-2.63102	70	314.7	4.58	120.961	5.13	4.45	1.15	0
1684	1	160	65	25.3906	62	1	136	72	0	6.8	3.78	121	6.43	165	14.4	19.9	107	-2.4093	62	286.5	6.55	97.4982	1.34	2.02	1.42	0
1685	1	164	66	24.539	66	1	148	80	1	7.1	4.12	115	6.02	160	12.3	14.5	51	-2.45705	52	298.9	6.48	99.4052	1.15	2.45	1.29	0
1686	1	158	63	25.2363	71	1	112	76	0	8.7	3.9	116	5.17	154	27	22	117	-2.9047	57	447	7.52	94.253	2.14	3.12	0.83	0
1687	2	175	85	27.7551	63	1	157	88	1	7.4	4.1	129	5.67	170	20.1	18.5	85	-2.3502	82	408.9	6.64	92.5512	3.45	3.19	0.99	0
1688	2	175	75	24.4898	78	1	134	78	0	6.8	3.21	95	12.49	167	23	33	73	-1.77288	144	553	23.9	42.8952	1.94	1.43	0.52	0
1689	2	170	61	21.1073	33	1	128	84	0	10.6	4.74	139	8.22	250	15.4	16.9	96	-2.86076	61	392.7	5.16	125.313	4.09	4.18	1.22	1
1690	2	163	48	18.0662	69	1	137	61	0	5.8	3.32	108	4.78	137	27	21	51	-2.66502	70	180	6.88	96.0968	0.74	1.36	1.17	1
1691	1	151	43	18.8588	50	1	117	72	0	9.9	4.37	138	6.54	322	13.4	17.5	94	-2.85571	53	213.5	7.18	109.303	1.44	2.86	1.15	0
1692	2	175	70	22.8571	81	1	127	65	0	6.4	3.84	120	6.11	203	21	25	152	-2.55118	71	353	5.03	88.8048	0.75	3.41	1.02	0
1693	2	175	90	29.3878	78	1	129	91	1	10.7	5.76	170	9.38	196	12	13	123	-2.88029	94	548	10.95	71.5633	1.77	3.37	0.66	0
1694	1	156	68	27.9421	68	1	122	75	0	10.5	4.19	126	6.28	139	53	33	101	-2.88806	42	329	6.4	103.362	2.13	2.71	1.24	0
1695	1	160	60	23.4375	71	1	143	85	1	11	4.28	130	8.28	157	31.8	23.5	97.2	-3.0498	39.8	169.2	3.75	102.775	1.86	2.79	1.28	0
1696	2	167	69	24.7409	48	1	122	87	0	10	5.31	162	8.34	252	31	17	87	-3.45592	56	258	8	117.138	1.82	3.38	1.22	0
1697	2	170	76	26.2976	55	1	130	93	1	7.1	4.78	142	6.1	220	25	18	71	-2.5825	75	377	4.75	102.677	2.23	2.53	0.8	0
1698	2	172	76	25.6896	37	1	114	76	0	5.9	5	152	7.67	136	27	20	72	-2.97529	78	332	8.5	113.488	1.68	3.06	1.14	0
1699	1	160	70	27.3437	62	1	129	84	0	9	4.27	126	6.24	349	10	15.9	69	-2.42448	52	275.7	4.95	101.909	1.6	1.91	0.95	0
1700	2	168	69	24.4473	74	1	130	71	0	6.6	4.4	144	4.74	137	27.6	46.2	75	-2.37978	74	366.6	4.73	91.6043	1.39	3.03	1.51	0
1701	2	170	71	24.5675	67	1	110	71	0	10.4	4.51	138	7.34	252	13	18	72	-2.21264	60	351	5.17	101.936	1.57	3.63	0.93	0
1702	2	170	59	20.4152	61	1	126	89	0	8.1	4.95	151	5.31	174	16	14	74	-2.64047	64	265	6.02	103.77	0.78	0.94	0.96	0
1703	2	172	83	28.0557	55	1	119	64	0	6	4.34	123	8.37	130	30	25	61	-3.08066	96	366	7.1	80.5084	1.1	1.82	0.96	0
1704	2	163	62	23.3355	74	1	129	87	0	6	4.66	141	5.94	172	17	17	62	-3.48061	99	724	12.24	68.9422	1.57	3.03	0.9	0
1705	1	150	47.5	21.1111	76	1	155	86	1	8.5	4.16	128	4.57	141	18	23	37	-2.4226	75	258.3	4.8	71.1179	0.73	1.59	1.43	0
1706	1	160	85	33.2031	59	1	154	98	1	8.4	4.4	132	6.44	203	55	20	102	-3.09597	61	219	5.31	99.9099	1.63	2.45	1.04	0
1707	2	170	70	24.2215	64	1	112	64	0	7.1	4.07	133	5.95	153	18	46	86	-2.87179	85	366	9.2	88.0957	5.22	2.98	1.01	0
1708	1	165	92	33.7925	58	1	150	83	1	10.4	4.36	132	6.13	251	35.3	33.1	54	-2.53384	55	275.3	3.02	103.073	1.24	1.86	0.94	0
1709	2	175	90	29.3878	55	1	181	84	1	7.9	4.38	130	8.5	197	77	14	86	-2.9312	96	397	9.7	80.5084	1.28	2.81	0.86	1
1710	2	171	70	23.939	67	1	124	75	0	9.3	5.55	163	5.83	240	21.8	20.7	119	-2.6308	59	368.4	7.68	102.455	1.29	2.92	1.19	0
1711	2	178	86	27.143	41	1	133	85	0	6.8	4.58	137	7.89	237	30	21	73	-3.205	50	516	4.31	126.61	16.59	1.39	0.77	0
1712	1	160	73	28.5156	61	1	104	65	0	9.6	4.77	148	10.41	348	16	14	71	-2.33026	66	208	7.3	91.0154	1.85	2.57	0.97	0
1713	2	170	62	21.4533	55	1	124	96	1	6.5	4.65	121	8.72	218	13.2	11.6	124	-2.57004	101	266.2	8.53	75.7497	1.67	3.55	1.12	0
1714	1	162	55	20.9572	75	1	152	86	1	9.7	4.34	122	6.93	196	13.1	12.7	66	-2.36882	46	161.2	4.18	96.8127	1.85	3.24	1.15	0
1715	2	175	65	21.2245	70	1	140	86	1	8.5	4.92	155	5.12	199	27	23	73	-2.47398	93	320	7.5	76.1854	1.14	2.48	0.81	0
1716	1	158	70	28.0404	43	1	175	100	1	8.6	4.75	146	14.46	217	17	11	56	-3.2477	55	346	4.6	113.152	6.99	3.21	1.07	1
1717	2	168	60	21.2585	60	1	135	91	1	7.1	5.06	148	4.25	206	14.2	17.3	65	-2.8757	99	369.1	5.5	75.2141	1.26	2.72	1.04	1
1718	2	177	80	25.5354	75	1	152	75	1	9	4.75	140	7.41	186	17.2	17.6	83	-2.81794	79	299	5.53	89.2564	0.96	2.09	1.46	1
1719	2	172	89	30.0838	46	1	125	86	0	8.4	5.49	165	6.11	210	86	37.2	98	-2.84122	53	500.4	4.97	120.593	3.31	2.25	0.89	0
1720	2	172	72	24.3375	75	0	121	74	0	7.9	4.38	143	5.9	174	15.7	17.7	63	-2.44494	71	300.1	5.97	92.1812	3.14	2.7	0.96	0
1721	2	179	77	24.0317	39	1	141	83	1	11.2	5.05	141	5.23	180	21.7	13.4	112	-2.68615	61	296.7	6.39	120.723	1.62	4.06	0.96	0
1722	1	151	56	24.5603	60	1	124	74	0	8	3.52	102	6	166	5.1	15.9	45	-2.8212	58	247.9	6.38	100.505	2.31	3.46	1.24	1
1723	2	174	103	34.0203	67	1	147	92	1	7.7	4.8	142	5.6	134	71	35	59	-2.53102	69	380	5.53	97.7233	1.63	2.47	0.67	0
1724	1	155	70	29.1363	52	1	120	73	0	12.4	4.88	147	6.41	162	121.7	48.7	95	-2.5472	46	216.8	5.7	111.701	1.01	3.33	1.37	0
1725	2	170	70	24.2215	68	1	149	93	1	11.2	4.92	122	5.68	285	11	16	99	-3.11444	108	344	6.83	64.4681	1.07	3.03	1.25	0
1726	2	173	81	27.0641	49	1	121	75	0	8.9	4.92	146	6.3	207	20	26	91	-3.05388	70	378	4.1	108.825	1.82	3.51	0.98	0
1727	1	162	68	25.9107	58	1	160	90	1	6.7	4.08	123	3.81	215	15	19	38	-2.9101	37	264	5.57	113.406	1.56	3.09	1.32	1
1728	2	179	67	20.9107	51	1	112	67	0	6.8	3.8	122	5.41	176	41	29	48	-2.71516	62	228	3.51	111.492	0.85	1.57	0.78	0
1729	2	175	75	24.4898	53	1	129	94	1	14.9	4.66	136	5.56	208	17.2	17.2	78	-2.32346	50	289.2	4.3	117.505	2.27	4.32	0.99	0
1730	1	157	60.5	24.5446	64	1	137	76	0	9.4	3.93	130	7.94	249	62	42	75	-2.69252	46	367	4.65	103.668	1.74	4.17	0.95	0
1731	1	168	70	24.8016	51	1	111	76	0	6.5	4.52	140	5.78	252	22.8	20.4	56	-3.16058	48	235.3	4.74	111.25	0.69	1.64	1.13	0
1732	2	182	92	27.7744	31	1	136	86	0	10.4	5.3	154	8.11	204	36	20	100	-3.17298	50	416	6.07	134.734	1.24	5.6	1.18	0
1733	1	160	52	20.3125	64	1	107	55	0	6.7	4.19	131	6.5	167	12.1	16	46	-2.43488	48	200.2	3.7	102.61	1.36	2.54	1.32	1
1734	2	170	95	32.872	59	1	149	100	1	8.7	4.1	113	7.22	214	15.6	12.5	98	-2.28252	104	212	7.5	71.3383	3.2	3.94	1.17	0
1735	1	165	67	24.6097	26	0	123	80	0	7.8	4.29	130	10.76	390	33	19	50	-3.01608	33	432	4.33	142.247	2.48	3.39	0.85	0
1736	1	160	66	25.7812	72	1	143	86	1	7.6	4.58	127	6.02	201	19	20	119	-3.03568	43	208	5.43	100.252	2.3	1.98	0.8	0
1737	2	170	60	20.7612	66	1	115	74	0	7	3.33	102	7.31	156	24	28	83	-2.79973	85	387	8.37	87.0067	1.38	3.23	1.04	0
1738	2	165	70	25.7117	59	1	114	73	0	6.3	4.95	176	5.57	137	17.8	20.5	87	-2.6165	98	408	3.87	76.611	0.84	2.71	1.07	0
1739	2	165	51	18.7328	65	1	126	84	0	5.8	4.15	133	5.22	136	37	29	57	-2.66948	96	361	5.6	75.6539	0.69	1.88	1.03	1
1740	1	155	65	27.0552	61	1	168	100	1	6.6	4.39	134	8.23	92	39.9	28.1	82	-3.39188	58	301	5.1	99.8815	1.72	2.19	1.3	0
1741	2	170	66	22.8374	50	1	110	72	0	6.6	4.62	137	5.52	128	39.4	19.8	71	-2.26656	58	294.9	4.59	114.47	1.95	1.72	0.73	0
1742	2	173	80	26.7299	57	1	118	88	0	8	2.83	76	7.16	362	19	21	62	-1.96866	91	235	4.1	84.7842	0.93	2.28	0.59	0
1743	2	170	70	24.2215	53	1	114	80	0	7.1	5.28	156	6.17	166	94.3	56.7	83	-2.94796	62	331.2	4.91	110.114	2.6	3.43	1.12	1
1744	2	169	57.5	20.1323	51	2	139	90	1	10.5	4.9	143	5.54	214	26	13	73	-2.62656	48	242	5.22	120.451	1.54	3.36	0.85	1
1745	2	176	83	26.7949	66	1	149	98	1	5.5	4.9	147	6.25	194	13	15	58	-3.21902	116	221	8.5	59.9109	3	2.88	0.86	0
1746	1	153	58	24.7768	49	1	182	119	1	8.2	4.93	140	4.57	259	97	65	82	-2.9297	40	445	5.63	117.703	1.54	3.65	0.97	1
1747	2	173	67	22.3863	50	1	122	82	0	12.2	5.12	146	4.45	170	22.7	18	78	-2.4778	53	204.3	4.54	117.63	1.1	3.1	1.13	0
1748	2	169	115	40.2647	38	1	135	82	0	10.3	5.86	165	4.69	198	112	58	90	-3.05802	52	402	4.87	127.476	1.08	2.11	0.7	1
1749	1	158	78	31.245	73	1	130	67	0	11.3	3.97	124	7.13	193	15	19	98	-2.6638	41	363	4.9	100.781	1.29	2.79	1.47	0
1750	2	179	77	24.0317	42	1	131	71	0	13	5.22	159	5.06	135	31.7	18.7	103	-2.20434	62	206.3	5.29	117.911	0.86	2.93	1.1	1
1751	1	158	55	22.0317	86	2	125	73	0	6.3	4.66	124	5.99	225	25	26	88	-2.78207	46	442	5.3	90.411	3.02	2.94	1.21	0
1752	1	160	60	23.4375	79	1	127	65	0	9.4	3.56	115	6.24	193	17.9	25.9	50	-2.54752	86	301.9	8.98	59.2313	1.46	2.85	1	0
1753	2	173	75	25.0593	45	1	155	100	1	7.9	4.75	145	6.54	197	29.8	26.8	66	-2.93052	72	364.8	5.56	110.621	2.97	3.35	1.24	0
1754	1	155	70.8	29.4693	73	1	146	70	1	6.5	3.86	118	5.33	174	10	11.9	67	-3.12188	74	382	6	73.6339	1.55	4.11	1.48	0
1755	2	165	72	26.4463	75	1	130	72	0	11.7	4.41	130	10.05	374	33	20	137	-2.60722	51	233	5.11	101.868	1.87	1.41	0.49	0
1756	2	176	70	22.5981	74	1	146	76	1	7.2	4.27	128	4.87	136	18	20	61	-2.44942	74	298	6	91.6043	0.87	1.65	0.93	0
1757	2	173	76	25.3934	42	1	125	87	0	6.8	4.47	138	9.68	203	20.4	18.2	70	-2.99764	59	286	9.2	119.69	1.28	1.91	0.84	0
1758	1	155	60	24.974	54	1	110	74	0	9.1	4.34	119	6.98	217	28.4	20.6	63	-3.00786	52	239	4.3	107.108	2.93	3.26	1.08	0
1759	1	158	55	22.0317	65	1	132	77	0	9.9	4.08	127	5.27	201	54	30	129	-3.38647	50	157	4.9	100.975	1.05	1.91	1.38	0
1760	2	169	70	24.5089	62	1	122	80	0	8.1	4.54	143	5.81	168	10	13	83	-2.95997	68	311	5.6	101.255	1.08	2.71	0.9	0
1761	2	162	62	23.6244	56	1	135	87	0	7.1	3.38	103	5.89	177	15	16	39	-2.64064	123	391	8.97	59.4264	0.85	1.84	0.75	1
1762	1	170	100	34.6021	40	1	133	97	1	11.7	5.13	157	6.82	262	24.2	25.2	109	-2.36752	51	412.5	3.05	117.4	4.07	2.69	0.7	0
1763	1	152	61	26.4024	59	1	146	77	1	8.6	4.26	122	7.95	291	10	13	128	-2.88846	50	343	3.5	104.814	3.63	1.94	1.14	0
1764	1	155	62	25.8065	56	1	115	70	0	12.6	3.96	120	8.17	367	12.4	11.1	108	-2.7804	64	239	5.4	97.422	1.96	2.64	0.69	0
1765	2	185	85	24.8356	92	2	115	75	0	9.1	3.87	122	5.94	127	20	16	75	-2.52028	96	394	8.98	63.9593	1.1	0.85	0.73	0
1766	2	170	71	24.5675	61	1	168	91	1	8.9	4.5	126	5.24	154	12	13	64	-1.9759	89	347	5.71	84.9362	0.84	3.6	0.99	0
1767	1	162	65	24.7676	77	1	145	80	1	8	3.88	122	5.34	192	50	36	87	-2.46526	52	146	5.65	92.8321	0.96	1.14	1.06	0
1768	1	160	66	25.7812	70	1	124	78	0	10.1	4.49	129	6.06	212	14	15	62	-2.90342	59	435	6.4	94.056	2.29	4.69	1.26	0
1769	2	174	86	28.4053	37	2	154	96	1	8.6	4.51	129	5.61	232	31.4	17.8	78	-2.61658	70	352.8	5.15	117.258	2.37	1.73	0.97	0
1770	1	162	72	27.4348	56	1	162	97	1	13.1	4.95	146	5.82	183	15.4	14.4	65	-2.3396	33	301.2	5.56	118.036	1.96	3.75	1.28	0
1771	1	158	58	23.2335	74	1	140	80	1	7.8	4.81	144	4.28	173	16.4	15.7	69	-2.63103	53	259.4	7.61	94.1472	1.68	4.09	1.5	1
1772	2	175	70	22.8571	80	2	124	76	0	7.2	4.14	131	8.29	145	12	18	79	-2.54446	69	279	4.07	90.1333	0.68	1.79	0.76	0
1773	2	170	50	17.301	68	1	137	92	1	10	3.85	119	5.29	126	23	29	121	-2.39644	178	346	10.3	35.3956	1.1	1.3	1.26	0
1774	2	147	63.5	29.3859	61	1	122	83	0	7.2	3.85	114	7.2	329	14	14	96	-2.7145	118	438	10	60.5483	2.89	3.3	0.99	0
1775	1	160	62	24.2187	59	1	148	75	1	6.8	4.21	127	5.87	229	45	28	108	-3.44791	70	497	4.99	85.8721	2.41	2.45	0.91	0
1776	2	168	95	33.6593	52	1	134	77	0	6.6	5.76	159	12.18	119	27.6	31.6	80.8	-2.04796	114	651.7	8.89	66.7396	0.62	1.2	0.54	0
1777	1	150	42	18.6667	57	1	106	70	0	7.6	3.06	85	2.91	86	14	21	89	-1.86642	40	142	3.41	111.99	1.12	1.78	0.71	0
1778	1	160	52	20.3125	61	1	145	88	1	6.5	3.82	116	3.35	158	13	13	43	-2.85712	53	320	5.5	102.075	0.91	2.5	1.15	0
1779	2	170	79	27.3356	37	1	154	94	1	9.1	4.92	150	5.8	260	30	22	84	-3.03208	59	364	4.88	123.471	3.43	2.94	0.9	0
1780	2	170	77	26.6436	68	1	135	84	0	7	4.21	127	7.86	246	17	17	107	-2.89836	55	329	6	104.002	1.66	1.49	0.9	0
1781	1	148	53	24.1965	69	1	174	88	1	10.9	3.44	111	4.33	175	21.9	16.6	66	-2.52076	55	225.2	4.84	96.2577	0.76	1.52	1.04	0
1782	1	160	60	23.4375	78	1	140	76	1	13.9	4.54	133	7.57	163	14	16.8	140.7	-2.48318	66.5	287.3	5.62	81.1455	2.04	5.51	1.18	0
1783	2	170	75	25.9516	43	1	136	101	1	7.4	4.76	152	6.08	192	25	12	49	-2.73692	74	254	8.17	111.083	4.48	2.81	0.98	0
1784	2	170	77	26.6436	71	2	132	61	0	8.1	3.77	118	7.83	254	24	24.5	90	-2.604	66	349.9	6.24	96.6105	2.25	2.34	0.81	0
1785	2	165	64	23.5078	71	0	122	83	0	6.5	4.24	138	5.24	290	15	19	92	-2.4926	76	339	5.2	92.5808	0.72	3.47	1.37	0
1786	2	170	87.6	30.3114	51	1	138	100	1	9.3	4.28	133	6	187	131.6	65	121	-2.74308	69	343.6	5.88	107.948	1.48	1.91	0.77	0
1787	1	164	70	26.0262	45	1	136	95	1	10.3	4.24	124	7	341	213	151	345	-2.49312	44	193	5.37	117.927	2.5	2.63	1.11	0
1788	1	150	55.5	24.6667	66	1	115	81	0	8.4	4.92	149	5.75	270	24	21	72	-3.2593	35	317	5.65	109.357	1.41	3.94	1.08	0
1789	1	162	65	24.7676	61	1	127	66	0	7.7	3.87	115	5.95	229	12	19	58	-2.51489	39	223	4.44	109.907	1.19	2.84	0.92	0
1790	1	155	61.5	25.5983	81	1	141	82	1	7.8	3.37	105	7.7	164	44	41.1	118	-2.8089	37	222	4.55	98.2911	1.18	2.4	1.2	0
1791	1	160	63	24.6094	58	1	116	81	0	7.2	4.02	124	3.68	187	14	16	72	-2.7377	40	235	4.5	111.295	2.3	2.72	1.17	0
1792	1	155	52	21.6441	75	1			0	9.7	3.88	123	5.82	171	14.1	19.6	72	-2.46757	55	296.6	6.32	92.732	1.45	2.69	0.78	0
1793	2	170	90	31.1419	70	1	141	79	1	8.3	4.77	154	3.34	83	101	59	86	-2.15041	63	436	6.86	98.5886	2.11	1.92	0.68	0
1794	1	164	72	26.7698	50	1	120	75	0	6.6	3.92	124	5.75	168	34.8	19	75	-2.68046	39	286.2	4.2	117.689	1.38	1.71	1.28	0
1795	2	170	56	19.3772	74	1	140	76	1	8.4	3.85	116	5.17	182	9.4	12.9	71	-1.89	89	400.4	8.55	78.3393	2.31	3.46	1.07	0
1796	1	158	55	22.0317	72	1	147	96	1	9.3	4.31	118	10.38	226	18	17	107	-3.10507	64	225	4.82	88.1943	0.71	2.04	1.96	0
1797	2	168	60	21.2585	62	1	120	80	0	10.2	3.78	116	5.16	158	16	28	74	-2.4487	153	452	13.15	44.0585	1.08	1.33	0.8	0
1798	2	175	65	21.2245	56	1	161	101	1	9.3	5.01	139	6.38	109	39	38	202	-2.62402	49	756	8.4	116.039	1.71	2.25	0.95	1
1799	1	155	62.5	26.0146	57	1	155	99	1	11.1	3.49	111	5.12	169	12.1	14.9	91	-2.5514	103	254.4	6.63	54.6975	4.25	3.22	1.01	0
1800	2	176	93	30.0232	60	1	142	100	1	9.4	4.01	137	3.96	62	21	26	115	-2.44552	51	198	4.8	111.828	1.74	3.46	1.4	0
1801	2	171	71	24.281	49	1	129	86	0	8.3	3.95	129	4.2	147	18.3	15.4	66	-2.69476	82	426.2	7.65	100.971	3.75	3.35	0.91	0
1802	2	174	73	24.1115	57	1	142	88	1	6.1	4.38	122	5.68	139	34	20	68	-3.25854	123	331	10.1	59.058	1.1	1.86	0.8	0
1803	2	170	61.5	21.2803	71	1	147	70	1	8.5	3.98	131	5.23	194	13	15	73	-2.87624	123	403	10.4	54.1333	1.9	2.56	0.71	0
1804	1	150	52	23.1111	80	2	109	62	0	7.2	4.16	131	7.52	201	15	18	45	-2.8684	51	396.2	9.4	91.5435	2.72	3.12	1.13	0
1805	2	170	71	24.5675	67	1	123	67	0	8	4.24	128	4.94	100	15	16	55	-2.22586	78	266.8	6.6	94.1712	0.98	1.8	1.34	1
1806	2	162	70	26.6728	40	1	132	96	1	9.4	5.15	154	7.05	285	35	21	133	-3.24414	54	323	8.1	124.473	4.79	2.73	1.11	0
1807	2	170	64	22.1453	61	1	145	89	1	12.2	5.37	159	6.3	197	21	17	134	-3.30252	58	186	11.85	106.901	2.95	3.38	0.97	0
1808	2	162	66	25.1486	58	1	131	93	1	6.5	4.6	143	4.86	212	43.1	33.7	60	-2.84311	72	231.5	5	102.029	0.79	1.21	0.78	0
1809	2	160	64	25	60	1	153	81	1	6.7	3.74	125	5.55	169	30	30	83	-3.23767	77	388	7.27	98.7455	0.45	0.83	0.84	0
1810	1	165	48	17.6309	61	1	128	62	0	6.9	3.7	109	3.57	149	14	20	64	-2.25661	57	227	9.48	100.301	1.07	2.49	1.42	1
1811	2	163	77	28.9811	50	1	138	85	0	7.3	4.55	143	6.04	159	19.6	22.5	94	-3.05859	72	397.6	4.43	107.234	2.44	3.87	1.12	0
1812	2	168	74	26.2188	59	1	116	68	0	6.5	4.64	139	5.35	159	10	16	62	-2.63276	56	294	8.03	109.392	0.95	2.52	0.93	0
1813	1	160	62.5	24.4141	59	2	155	91	1	8.3	5.18	158	7.46	225	29.6	20.3	93	-2.82054	52	294.7	5.62	103.828	1.42	3.8	1.41	0
1814	2	178	80	25.2493	59	1	128	59	0	5.8	4.44	131	6.11	136	23.9	25.2	71	-3.14166	99	316	4.8	75.6834	1.34	1.64	0.85	0
1815	2	155	48	19.9792	52	1	115	75	0	17.1	4.18	129	4.48	161	9	14	133	-2.97166	82	240	7.6	99.1044	0.79	2.47	1.3	0
1816	1	160	77	30.0781	65	1	139	90	1	6.2	4.8	143	7.98	250	38	29	120	-3.36721	54	259	8	99.1197	0.99	3.91	1.43	0
1817	2	175	79	25.7959	51	1	133	89	0	7.9	5.12	151	8.69	177	21	16.3	53	-2.72118	86	446.5	5.69	94.183	1.98	3.61	1.13	0
1818	2	180	108	33.3333	50	1	154	105	1	12.3	5.68	155	5.91	170	29.4	17.8	97	-2.40772	61	370.1	4.75	112.74	2.19	3.7	0.95	0
1819	2	168	80	28.3447	53	1	131	92	1	6.8	4.58	149	6.28	173	36	32	68	-3.03899	106	294	6.05	72.3772	1.51	1.77	0.99	0
1820	2	165	62	22.7732	48	1	115	87	0	8	4.72	151	3.76	158	13	15	61	-2.41782	65	208	5.42	111.982	1	2.19	1.36	0
1821	1	160	66	25.7812	80	1	143	82	1	7.5	4.34	136	4.87	148	21.4	28.4	70	-2.4132	61	238.3	4.91	87.6773	1.23	2.96	0.89	0
1822	1	165	65	23.8751	51	1	109	72	0	7.5	4.51	128	6.7	228	34	22.8	89	-2.58003	53	277.1	3.06	108.625	2.38	3.47	1.22	0
1823	1	150	42	18.6667	40	1	134	97	1	11.7	4.38	128	4.4	201	8.2	14	68	-2.85012	40	169.8	3.82	124.479	1.3	3.05	1.06	0
1824	2	165	60	22.0386	50	1	131	91	1	7.6	4.95	151	10.15	202	9	11	61	-2.474	59	330	5.68	113.881	2.35	2.21	0.79	0
1825	1	150	58	25.7778	55	1	117	90	1	7.3	4.35	142	5.71	177	28	28	88	-2.90048	41	264	4.51	112.719	1.81	1.69	0.75	0
1826	2	169	67	23.4586	44	1	116	87	0	8.1	4.12	126	7.52	293	29	18	89	-3.48272	88	286	8.31	95.697	2.01	3.01	0.91	0
1827	1	168	75	26.5731	54	1	114	72	0	7.8	4.28	121	5.17	265	26	19	54	-3.04753	41	193	4.9	113.422	2.83	1.92	1.02	0
1828	2	165	67	24.6097	51	1	110	72	0	10.8	4.39	126	7.06	194	27	15	70	-3.01948	107	537	10	72.462	5.86	3.67	1.19	0
1829	2	163	64	24.0882	73	1	141	74	1	6.7	3.67	112	3.95	116	17	23.3	25	-2.55911	92	347.4	7.93	75.7536	1.57	1.8	0.91	0
1830	2	176	78	25.1808	59	1	115	76	0	5.9	4.44	136	6.85	271	14.2	14.2	61	-2.53076	74	344.7	4.59	100.561	2.52	2.63	1.04	1
1831	1	164	58	21.5645	60	1	117	86	0	6.2	3.93	126	6.38	186	11.6	17.1	69	-2.83298	64	351.5	5.54	95.0283	1.15	2.79	1.44	0
1832	1	155	75	31.2175	81	2	144	74	1	6.8	3.59	118	4.87	144	109	86	80	-2.70593	69	313	6.64	76.1954	1.07	2.4	1.15	0
1833	1	160	68	26.5625	64	1	161	91	1	6.6	4.33	131	7.58	235	16	19.1	66	-3.03049	63	216	9.21	94.4618	2.88	1.15	0.84	0
1834	2	165	68	24.977	59	1	150	94	1	7	5.75	170	5.65	149	18.2	18.2	69	-2.87239	67	327.5	7.55	103.625	3.49	2.08	0.8	0
1835	1	168	65	23.03	64	1	148	87	1	7	3.8	114	6.45	226	20	17	78	-3.74082	59	230	6.7	97.6321	1.43	2.52	1.24	0
1836	2	170	85	29.4118	55	1	194	108	1	9	4.35	130	9.1	169	30.5	16.3	96	-2.41876	130	502.5	11.09	55.9545	2.74	3.43	0.86	0
1837	2	168	61	21.6128	82	1	150	82	1	6.6	3.74	137	5.22	98	13.8	19	60	-2.66088	105	287.3	8.43	61.1241	0.69	1.81	1.79	0
1838	2	170	71	24.5675	66	2	148	86	1	6.1	3.7	104	4.96	132	14	18	78	-2.98172	74	306	4.3	96.2773	1.12	1.76	0.46	0
1839	2	174	71	23.4509	71	1	129	78	0	9.7	4.93	145	6.97	257	34	27	102	-2.87511	58	387	5.43	100.455	0.98	3.05	1	0
1840	2	172	72.5	24.5065	31	1	128	87	0	9.8	6.61	129	7.34	281	145.2	76.6	125	-2.57735	67	368.6	6.26	123.337	1.64	3.18	0.91	0
1841	2	172	65	21.9713	58	1	127	79	0	6.2	3.94	119	6.7	174	20	24	84	-2.75648	150	410	8.88	46.2545	1.34	3.69	1.31	0
1842	1	155	51	21.2279	73	1	135	76	0	8.1	3.49	97	4.14	119	19.6	24.1	94	-1.88726	82	373.5	5.48	65.0997	1.49	2.63	0.66	0
1843	1	156	48	19.7239	92	1	146	81	1	7.4	3.91	109	4.33	144	12	30	65	-2.57003	52	198	8.24	84.5635	1.28	2.19	0.6	0
1844	2	170	70	24.2215	22	0	115	73	0	10.8	4.85	142	4.84	288	199.9	137.1	112	-2.47766	47	420.5	4	145.179	1.33	2.79	0.84	0
1845	2	165	66	24.2424	63	1	106	66	0	16	3.4	101	6.21	242	15.5	15	81	-1.66612	153	424.6	12.38	43.7854	2.68	3.97	1.07	0
1846	2	170	65	22.4913	54	1	156	93	1	9.2	4.31	133	7.44	248	13	17	70	-2.59334	45	383	5.36	120.552	1.73	1.49	0.86	0
1847	2	172	70	23.6614	65	1	148	85	1	7.8	5.58	166	10.54	257	18	16	105	-3.15765	88	456	6.2	83.9803	1.51	2.85	1.07	0
1848	2	168	63	22.3214	49	1	150	97	1	9.5	4.55	148	5.2	204	36.4	32.4	60	-2.52563	68	371.4	4.1	109.782	2.34	3.6	1.19	0
1849	1	152	68	29.4321	63	1	154	92	1	8.3	4.67	135	6.17	221	34	28	81	-2.88806	42	228	6.02	106.627	1.63	3.28	0.85	0
1850	1	160	70	27.3437	67	1	145	75	1	6	3.82	115	4.93	221	20	16	88	-2.8552	43	405	3.39	103.419	4.04	1.43	0.9	0
1851	2	165	69	25.3444	52	1	155	99	1	10	5.02	158	7.45	229	16.5	17.6	37	-2.32034	64	511.7	6.19	109.744	1.94	3.2	1.64	0
1852	1	168	65	23.03	56	1	122	66	0	8.4	4.5	128	13.22	226	35	264	78	-2.66416	42	287	5.2	111.371	1.99	3.84	1.89	0
1853	1	160	68	26.5625	46	1	136	91	1	6.6	4.14	122	14.36	339	10	9	43	-1.40592	70	400	6.25	93.1033	1.45	4.09	1.7	0
1854	1	157	50	20.2848	73	1	133	20	0	5.7	3.48	112	5.1	253	8.5	15.9	26	-2.7989	46	289.3	4.37	98.0244	1.33	3.43	0.92	0
1855	1	151	50	21.9289	70	1	156	82	1	7.5	3.8	118	5.31	81	13.8	21.2	100	-2.68394	42	265.7	4.18	102.084	6.65	3	0.86	0
1856	2	170	92	31.8339	33	0	125	89	0	9	4.95	150	9.28	271	67.3	35.4	60	-2.68991	65	363.5	4.77	122.932	1.37	3.96	1.03	0
1857	1	148	50	22.8269	77	1	140	76	1	9	3.35	109	4.17	249	10.4	13.4	90	-2.22153	50	221	4.97	93.7137	1.15	2.79	1.39	1
1858	2	184	86	25.4017	28	0	137	85	0	11.4	5.26	160	7.06	199	109	46	69	-3.08799	59	443	4.49	130.579	1.72	2.19	0.71	0
1859	2	157	77	31.2386	82	1	147	90	1	7.1	4.36	135	5.57	104	25.8	27.5	66	-2.21078	101	490.3	7.51	64.0404	1.32	1.56	1.2	0
1860	2	176	76	24.5351	48	1	157	92	1	9	5.02	157	4.87	240	21.5	23.6	62	-2.77221	56	352.3	4.57	117.138	3.96	3.4	1.32	0
1861	2	163	85	31.9922	51	1	169	86	1	5.7	5.01	140	8.23	170	71	27	102	-2.78696	69	359	6.65	107.948	3.32	2.7	1.02	0
1862	2	168	85	30.1162	69	1	134	74	0	6.4	5.02	144	7.48	165	29	21	79	-3.20903	109	471	7.7	63.3637	1.95	2.7	1.09	0
1863	1	165	60	22.0386	57	1	142	96	1	13.6	4.76	138	6.19	176	26.7	19	65	-1.95548	42	283.5	3.63	110.681	1.43	2.55	0.92	0
1864	2	180	75	23.1481	59	1	129	75	0	6.4	4.35	140	7.13	256	21.4	19.1	70	-2.87348	54	259.6	4.85	110.6	1.07	1.71	1.06	0
1865	2	164	70	26.0262	80	1	142	79	1	6	4.2	133	7.95	204	15.6	15.9	64	-2.76296	75	393.2	5.21	87.8919	0.96	0.7	0.77	0
1866	1	158	59	23.634	65	1	139	76	0	11.8	4.07	134	6.15	128	35	66	95	-3.48936	58	284	7.6	97.4273	1.23	1.69	0.99	0
1867	1	150	63	28	69	1	131	83	0	10.5	5.09	152	7.3	231	52	42	123	-2.44739	49	240	7.2	98.975	1.44	2.23	1.01	0
1868	1	146	53	24.864	69	1	144	87	1	7.2	4.28	135	8.38	274	16	20	76	-3.10014	71	319	7.9	79.3322	1	3.26	1.26	1
1869	1	155	55	22.8928	71	1	117	62	0	9.5	4.59	135	11.13	371	16	19	89	-2.97444	76	461	6.9	72.2073	2.65	2.42	1.07	0
1870	1	156	61	25.0657	50	1	121	77	0	5.7	4.45	128	3.91	147	16	16	77	-2.72304	52	261	5.2	109.806	0.88	1.24	1.21	1
1871	2	175	70	22.8571	51	1	136	86	0	6.8	4.68	136	6.12	168	24	24	57	-2.85907	77	367	7.25	104.43	1.73	1.12	0.65	0
1872	2	167	72	25.8166	88	2	142	87	1	8	3.87	123	7.06	130	14.6	18	53	-2.6832	60	433.3	8.43	89.4557	1.48	1.26	1	0
1873	1	152	60	25.9695	70	1	151	76	1	9.2	4.26	121	5.01	149	15	17	81	-2.87864	42	519	7.83	102.084	0.68	0.99	0.9	0
1874	2	162	56	21.3382	62	1	121	73	0	7.4	3.59	103	8.45	189	23.3	23	85	-2.36844	103	333.2	6.1	70.8361	1.09	1.4	0.69	0
1875	2	163	77	28.9811	59	1	148	86	1	12.2	5.15	151	5.71	142	22	15	81	-2.75424	94	424	7.18	80.5396	8.04	1.03	0.66	1
1876	2	170	56	19.3772	69	1	144	102	1	6.5	4.54	139	5.73	170	14	19	52	-2.84811	69	344	6.97	96.5153	1.42	2.23	0.93	0
1877	2	160	72	28.125	62	1	117	85	0	7.5	4.2	137	5.9	127	23	17	59	-2.82503	78	335	8.69	97.1456	5.45	1.56	0.7	0
1878	2	170	66	22.8374	49	1	140	95	1	6.4	3.74	117	5.09	233	26	20	79	-2.45763	62	269.1	5.14	112.888	1.45	1.77	0.9	0
1879	1	165	70	25.7117	22	1	128	80	0	5.8	4.09	118	8.11	195	16	14	65	-2.7068	45	355.2	4.76	135.328	0.86	2.34	1.1	0
1880	2	165	62	22.7732	68	1	139	75	0	6.4	3.89	125	8	207	10	16	49	-1.51557	68	471	7.48	97.5466	1.42	2.33	1.24	0
1881	2	171	83	28.3848	60	1	142	83	1	7.2	5.05	150	9.65	268	14.4	15.7	93	-2.2801	98	324.4	8.33	76.136	3.64	2.95	0.92	0
1882	1	160	68	26.5625	68	1	118	64	0	6.2	3.47	105	7.75	102	8	12	88	-2.9024	57	225	5.2	96.0281	1.14	1.07	1.09	0
1883	2	170	70	24.2215	69	1	131	96	1	7.5	4.08	125	5.61	216	28	22	58	-2.98192	62	222	6.1	99.6842	1.76	2.24	1.09	0
1884	2	168	78	27.6361	48	1	120	80	0	6.5	4.16	133	5.02	171	22	18	59	-2.56522	74	373	5.64	107.682	1.39	1.37	0.7	0
1885	1	151	48	21.0517	81	2	154	73	1	7.9	3.41	111	4.45	92	7	14	49	-2.83508	60	224	6.8	87.4815	1.23	3.94	1.57	0
1886	2	162	61	23.2434	73	1	128	77	0	6.5	4.21	129	7.08	118	36	45	75	-2.78254	72	256	4.9	92.9416	0.56	0.31	0.85	0
1887	1	160	58	22.6562	52	1	117	68	0	7.5	3.82	115	5.65	166	13.6	14.9	52	-2.13573	41	229.2	3.96	114.842	1.33	1.74	1.08	0
1888	1	170	80	27.6817	46	1	125	85	0	11.1	4.75	148	8.2	139	39	33	79	-3.10574	45	291	4.2	116.563	1.46	2.37	0.95	0
1889	2	170	68	23.5294	56	1	139	95	1	7	4.69	153	6.38	147	30	22	51	-3.03251	65	262	4.69	106.547	0.89	1.47	0.93	0
1890	1	155	55.5	23.1009	55	1	114	74	0	7	5.85	115	10.72	227	12	17	50	-2.78552	59	280	4.8	103.253	2.06	1.78	1.05	0
1891	1	160	71	27.7344	78	1	144	60	1	6.7	2.22	63	5.82	272	11	13.6	65	-2.28696	50	202.8	4.88	93.1327	1.66	1.64	0.69	0
1892	2	181	85	25.9455	33	1	115	83	0	8.3	4.7	146	6.2	211	58.3	27.8	81	-2.81914	69	327	5.25	120.735	3.5	2.93	0.85	0
1893	2	174	71	23.4509	53	1	139	86	0	10.7	5.12	157	6.96	220	9.7	15.6	89	-2.39153	89	381.2	6.66	89.269	1.39	3.25	1.13	0
1894	1	164	51	18.9619	52	1	98	68	0	10.7	4.39	129	3.96	207	22.3	25.8	86	-2.98365	28	182.5	5.85	125.897	0.93	4.07	1.67	0
1895	1	159	63	24.9199	57	1	109	79	0	7.9	4.17	133	7.61	150	17	15	111	-3.07671	90	419	11.47	64.3103	4.35	3.03	1.06	1
1896	2	164	76	28.257	60	1	129	90	1	10.2	4.86	144	5.06	150	19.7	18.2	104	-2.5318	59	235	4.26	107.014	2.48	2.53	0.78	0
1897	1	158	63	25.2363	60	1	140	83	1	9.3	4.26	123	5.56	262	15.9	15.6	78	-2.69182	53	209.7	6.31	102.712	1.78	2.44	1.01	0
1898	1	152	47.5	20.5592	62	1	133	87	0	7.8	5.05	145	8.62	254	52	38	107	-2.72118	35	234	5.67	112.111	2.35	3.67	1.13	0
1899	2	164	55	20.4491	69	1	141	81	1	8.5	4.54	143	4.71	133	22	17	96	-3.1659	67	309	7.3	97.3765	0.58	4.21	1.24	0
1900	2	170	65	22.4913	41	1	116	83	0	7.3	5.34	153	5	234	29	24	92	-3.3426	55	336	5.14	123.018	1.66	1.96	0.52	0
1901	2	168	74	26.2188	81	1			0	11.4	4.36	136	7.01	191	18.4	20.6	88	-2.19549	67	261.9	5.39	90.3737	0.56	1.92	1.17	0
1902	2	173	88	29.4029	57	1	122	76	0	10.3	4.8	149	6.49	246	47.3	25.8	36	-2.65812	97	422.9	8.13	78.5305	5.02	2.78	1.04	1
1903	2	168	58	20.5499	64	1	156	107	1	9.2	3.69	114	4.78	81	12	13	73	-2.3465	113	298	11.1	62.5984	1.25	3.43	1.42	0
1904	2	162	69	26.2917	82	1	129	83	0	7.7	4.07	122	6.79	136	22	23	61	-3.46998	63	498	8.1	91.4987	1.23	1.98	0.91	0
1905	1	160	80	31.25	34	1	145	93	1	6.7	3.56	102	6.26	307	14.2	15.2	63	-1.4867	79	353.6	7.42	86.7646	2.18	6.25	1.41	0
1906	1	158	64	25.6369	77	1	125	81	0	7.5	4.98	148	6.5	102	46	48	117	-2.55894	64	184	6	85.494	1.44	2.12	0.94	0
1907	2	170	62	21.4533	58	1	121	62	0	6.8	4.51	147	5.22	231	38	28	54	-3.03501	70	355	4.81	102.901	1.38	2.45	1.07	0
1908	1	155	65	27.0552	73	1	146	74	1	7.6	4.5	135	3.12	170	50.5	44.2	85	-2.6338	51	205.2	4.49	95.6169	1.75	2	1.04	0
1909	2	175	69	22.5306	68	1	146	91	1	11	4.49	125	6.3	260	12.7	15.1	86	-2.61532	52	211.2	3.75	105.778	1.08	2.12	0.97	0
1910	2	165	65	23.8751	70	1	163	78	1	10.7	4.06	128	3.07	153	13.9	16.2	83	-2.27148	56	172.6	7.72	102.159	1.04	2.7	1.27	0
1911	2	170	90	31.1419	51	1	144	80	1	7.5	5.53	174	8.65	225	29	13	76	-3.57303	81	563	6.2	101.202	2.22	3.08	0.89	0
1912	2	171	80	27.3588	56	1	158	97	1	6.8	4.68	146	6.15	192	43	33	60	-2.69354	85	508	6.8	92.5898	2	3.28	0.92	0
1913	1	160	61	23.8281	33	1	129	82	0	6.5	3.24	91	4.39	368	10	13	66	-1.76164	131	246	4	47.585	3.6	6.09	1.58	1
1914	1	160	68	26.5625	67	1	156	84	1	12.8	3.75	114	11.2	261	19	10	153	-2.542	100	321	15.08	53.2552	2.81	3.6	1.17	0
1915	2	171	110	37.6184	40	1	124	88	0	9.8	4.59	136	10.58	331	28.4	18.2	76	-2.71524	46	317.4	4.9	130.649	3.91	2.47	0.78	0
1916	2	173	101	33.7465	39	1	111	80	0	10.4	5.57	144	6.07	178	23.6	13.6	128	-2.58426	69	464	4.23	116.313	5.25	2.4	0.71	0
1917	2	170	75	25.9516	76	1	136	77	0	6	3.99	124	7.68	193	14	16	53	-2.83632	68	200	8.47	92.812	1.27	2.2	1.08	0
1918	2	171	89	30.4367	47	1	125	98	1	11.1	5.23	161	7.5	177	21.6	21.7	86	-2.58649	77	565.7	4.01	107.061	4.27	1.26	0.74	1
1919	2	175	75	24.4898	58	1	112	81	0	13.8	4.26	123	16.91	205	9	8	92	-1.36051	37	123.4	4.1	124.751	1.32	2.67	1.04	1
1920	2	188	90	25.464	57	1	167	100	1	9.1	4.4	142	7.01	177	13	13	61	-2.54806	63	261	6.37	106.891	0.65	3.1	1.17	0
1921	2	175	88	28.7347	42	1	144	98	1	10.7	4.61	136	4.83	197	23.1	16.3	92	-2.49594	57	268.2	5.2	120.943	1.91	2.05	1.08	0
1922	2	165	72	26.4463	58	1	140	80	1	8.1	3.98	110	5.34	154	44	21.9	104	-2.24574	54	312.6	4.24	111.29	1.07	1.23	0.7	0
1923	1	152	60	25.9695	74	2	110	61	0	6.8	4.2	126	4.55	113	14	15	86	-3.31588	77	225	6.9	69.7695	1.78	2.33	1	0
1924	2	162	79	30.1021	47	1	122	101	1	6.8	5	158	8.07	196	20	15	74	-3.24502	92	386	5.79	89.0491	2.67	1.73	0.56	1
1925	1	166	65	23.5883	78	1	149	97	1	12	3.94	116	8.07	131	14	13	67	-2.68338	83	415	12.04	62.1952	5.18	2.71	0.93	0
1926	1	150	55	24.4444	72	1	110	75	0	6.5	3.51	110	6.12	177	9	15	80	-2.93876	105	420	8.3	48.6889	2.24	2.19	1	0
1927	1	155	55	22.8928	90	2	132	72	0	7.6	3.8	117	8.85	135	24	23	82	-2.70623	117	390	10.3	38.231	12.24	2.38	0.7	0
1928	2	172	76	25.6896	66	1	129	86	0	7.5	4.9	144	6.62	151	25.6	19.9	77	-2.44947	78	285.3	4.56	94.7587	1.45	1.61	0.8	0
1929	2	174	72	23.7812	51	1	198	103	1	9.3	5.25	153	5.23	168	14.9	15.9	69	-2.7476	69	239.6	5.99	107.948	0.89	2.4	1.08	0
1930	2	163	65	24.4646	80	1	149	75	1	6.6	3.66	108	8.16	148	19.4	15.2	84	-2.68266	178	403	15.4	32.8502	1.1	2.46	0.93	0
1931	2	177	71	22.6627	57	1	131	75	0	5.7	5.19	162	4.33	281	23	19	48	-2.63431	86	363	6.18	90.7333	1.59	2.63	0.92	0
1932	1	152	53	22.9398	83	1	153	73	1	8.4	3.68	108	6.87	185	10	19	70	-3.36584	84	503	9.9	59.4306	1.08	1.38	1.1	0
1933	2	179	85	26.5285	61	1	131	80	0	6.2	5.07	156	7.74	109	35	24	61	-3.2283	82	428	8.29	93.7096	3.44	2.95	0.76	1
1934	2	179	89	27.7769	66	1	142	85	1	6.4	4.28	133	6.24	182	19.3	17	70	-2.56096	63	397.3	8.01	101.072	0.73	2.86	0.96	0
1935	1	170	82	28.3737	60	1	144	84	1	8	4.13	123	7.35	159	22	22	65	-3.01224	65	589	8.21	93.2766	1.3	1.68	0.9	1
1936	1	150	55	24.4444	67	1	158	91	1	9.7	4.5	135	6.39	203	31	27	53	-3.27186	85	371	10.07	64.7231	1.43	1.25	0.98	0
1937	1	160	50	19.5312	53	1	112	76	0	5.7	4.47	129	14.83	203	139	62	98	-2.77518	47	321	5.18	110.434	1.2	2.53	0.82	1
1938	2	186	80	23.1241	48	1	173	74	1	8.3	5.08	159	6.67	117	16	13	62	-2.84013	47	365	5.03	123.503	1.77	2.47	0.96	0
1939	2	171	74	25.3069	24	0	131	80	0	14.1	4.98	156	5.96	219	23.1	16.1	96	-2.5357	81	409.1	5.06	119.706	2.19	2.19	0.82	0
1940	2	173	79	26.3958	58	1	146	81	1	7.3	4.34	130	5.94	248	18.8	15.2	88	-2.8938	67	354.9	7.69	104.271	2.66	2.88	1.03	0
1941	2	180	72	22.2222	59	1	122	57	0	7.7	4.27	133	7.85	152	30	25	76	-3.1457	84	257	6.63	92.178	3.5	1.75	1.17	0
1942	1	162	52	19.8141	67	1	138	71	0	8	3.37	110	2.75	88	9.9	19.1	75	-2.75176	49	315.9	8.68	100.214	0.83	2.26	1.11	0
1943	2	178	65	20.5151	54	1	90	61	0	12.3	4.27	126	7.34	164	10.2	13.6	94	-2.48976	74	429.1	8.37	103.737	2.26	2.92	1.3	0
1944	2	172	70	23.6614	41	1	132	87	0	11.5	5.44	154	6.67	268	42.7	22.8	59	-3.09289	65	335.6	6.37	116.965	1.58	4.27	1.72	0
1945	1	156	64	26.2985	70	1	162	100	1	8.5	4.09	127	5	193	16	18	57	-2.68724	61	274	5.17	93.3034	1.99	3.53	1.19	0
1946	2	176	70	22.5981	55	1	150	100	1	5.7	4.98	138	6.1	198	11.9	18.5	72	-2.36348	93	374.6	6.66	83.6348	0.75	2.65	1.09	0
1947	2	175	76.5	24.9796	49	1	121	81	0	8.5	5.4	163	7.4	224	85	54	88	-2.8785	54	296	5.48	117.697	2.81	2.42	0.82	0
1948	1	163	69	25.9701	69	1	132	78	0	8.1	4.7	141	7.4	219	20.5	22.8	95	-2.48802	146	374.4	11.92	33.3992	3.29	3.27	0.81	0
1949	1	169	72	25.2092	48	1	150	102	1	6.9	4.23	125	6.08	274	50	38	67	-2.87557	44	248	4.2	115.748	5.64	1.73	0.82	0
1950	2	165	55	20.202	69	1	116	62	0	5.8	4.52	148	6.56	120	30.2	22.5	82	-2.6575	80	450.6	4.78	91.8427	1.26	1.83	1.36	0
1951	2	172	89	30.0838	29	0	128	83	0	7.6	4.62	136	7.62	217	67	32	57	-3.08439	65	570	4.78	126.029	1.9	2.42	0.42	0
1952	1	165	60	22.0386	55	1	115	78	0	12.5	3.95	116	3.54	222	13.6	13.3	64	-2.62096	57	230.5	6.5	104.115	1.05	2.78	1.29	0
1953	1	150	66	29.3333	80	1	122	65	0	9	3.26	101	5.83	180	16	21	70	-2.49676	75	423	8.5	69.3705	0.77	1.95	1.19	0
1954	2	170	73	25.2595	58	1	137	97	1	10.3	5	162	5.78	167	25.8	30.3	89	-2.82994	76	289.9	5.69	100.377	1.82	1.52	1.03	0
1955	2	171	68	23.255	42	1	120	96	1	8.8	5.17	159	5.47	271	40.4	23.1	99	-2.8339	54	371.1	7	122.934	2.57	3.88	1.17	0
1956	2	166	61	22.1367	69	1	128	77	0	6.7	4.44	137	6.31	193	22	25	104	-3.29568	63	339	5.9	99.2037	0.76	2.16	1.15	0
1957	2	178	80	25.2493	35	1	135	87	0	9.7	4.87	151	8.24	222	20.3	18.1	74	-3.19774	60	310.9	5.61	124.383	6.21	3.77	1.05	0
1958	1	163	70	26.3465	66	1	168	89	1	7.1	3.48	105	6.2	185	13	22	90	-2.73476	56	281	5.1	97.6456	1.11	2.95	0.98	0
1959	1	160	60	23.4375	34	1	130	88	0	11	3.76	112	6.53	224	18	20.8	94.3	-2.21934	41.6	351.1	1.49	127.996	3.55	6.36	0.89	0
1960	2	177	74	23.6203	52	0	140	107	1	10.3	4.83	149	4.9	137	49.1	33.8	100	-2.99741	38	285.5	6.68	128.455	5.71	2.12	0.78	0
1961	1	154	63	26.5643	68	1	162	87	1	16.3	4.11	120	8.04	360	21	17	139	-2.65058	106	278	10.57	49.3507	1.04	3.49	0.99	0
1962	1	166	79	28.6689	59	1	170	96	1	9.8	3.96	122	4.77	203	44.7	30.9	95	-2.68496	53	303.4	5.79	103.353	0.95	2.06	1.06	0
1963	2	168	81	28.699	59	1	134	79	0	7.5	5.02	157	3.51	138	60	50	101	-2.4131	65	263	5.02	104.578	0.62	1.31	0.9	0
1964	2	173	102	34.0807	51	1	128	84	0	9.8	4.55	132	6.51	123	21	14	64	-2.7532	68	330	7.7	108.425	3.54	2.78	1	0
1965	1	155	75	31.2175	74	1	158	79	1	7.6	3.62	115	6.12	157	12	13	58	-2.7885	95	355	5.9	54.2233	1.57	2.14	1.35	0
1966	2	180	88	27.1605	56	1	121	81	0	7.5	4.76	150	8.04	152	17	14	88	-2.6342	61	335	4.1	108.611	1.28	2.03	0.76	0
1967	2	173	72	24.0569	48	1	126	87	0	9.3	5.22	153	5.21	110	9.2	13	57	-2.37162	75	306.3	6.35	107.246	1.26	2.28	1.12	0
1968	2	173	71	23.7228	69	1	125	81	0	10.8	3.96	124	5.21	202	23	21	44	-2.5987	88	319	5.9	81.9169	1.11	1.64	0.73	1
1969	2	175	82	26.7755	48	1	123	88	0	8.3	4.81	149	5.54	178	28	18	61	-2.60221	73	356	4.09	108.125	3.94	2.76	0.58	0
1970	1	153	60	25.6312	50	1	126	87	0	11.9	4.65	131	5.95	115	27	19	107	-2.79173	32	290	4.33	123.436	2.15	3.29	0.99	0
1971	2	171	63	21.5451	58	1	150	95	1	9.2	4.71	147	6.32	208	17	15	75	-2.63482	34	182	3.92	127.977	0.77	2.27	1.03	0
1972	2	172	70	23.6614	33	1	133	89	0	12.9	5.11	154	8.97	229	58.1	64.7	70	-2.608	72	300	4.22	119.193	1.53	2.94	1.29	0
1973	2	172	89	30.0838	53	1	146	85	1	8.6	4.75	149	4.39	156	30	20	70	-2.6566	65	340	5.5	108.554	1.48	3.4	1.11	0
1974	2	165	57	20.9366	71	1	146	93	1	5.8	3.38	109	4.1	168	20	27	51	-2.6682	55	235	4.09	102.079	0.96	2.31	1.42	0
1975	2	170	77	26.6436	79	1	146	68	1	6.5	3.04	81	5.88	182	12	21	84	-2.62711	66	277	5.26	91.9213	0.92	1.31	1.03	0
1976	2	172	86	29.0698	75	1	119	77	0	7.4	3.63	115	5.68	171	19.9	21	59	-2.65503	122	624.5	12.41	53.323	4.53	2.02	0.9	0
1977	1	146	42	19.7035	49	1	131	98	1	9.7	4.25	134	8.79	243	11	9	120	-2.77502	69	213	6.43	92.9739	1.02	1.24	0.78	0
1978	2	155	41	17.0656	72	1	119	66	0	4.7	2.82	88	2.36	101	10	23	49	-2.94466	61	362	6.24	98.3232	0.81	1.82	2.62	0
1979	1	155	64.5	26.847	74	1	160	105	1	8.6	4.58	137	6.87	170	20	32	101	-2.69164	70	324	6.3	78.2235	1.01	3.76	1.28	0
1980	2	183	71	21.201	61	1	177	81	1	5.2	4.17	131	5.95	215	12	17	75	-3.0762	66	382	4.9	102.81	1.11	2.14	1.13	0
1981	2	168	61	21.6128	71	1	138	79	0	8.5	4.78	143	3.69	162	20	19	106	-2.93276	76	265	6.6	92.5808	1.3	2.63	0.61	0
1982	1	155	48	19.9792	74	1	129	72	0	14.5	4.26	121	4.41	184	6	8	125	-3.21644	77	397	6.5	69.7695	2.6	3.35	1.04	0
1983	2	171	60	20.5191	59	1	136	88	0	9.3	4.03	134	11.59	212	64	38	153	-2.52479	87	335	17.6	88.3771	4.87	3.6	1.49	0
1984	1	155	58	24.1415	60	1	148	90	1	8.2	4.18	114	4.05	198	7.4	13.7	58	-2.44576	39	213.1	6.38	110.592	1.77	2.38	1.1	0
1985	1	165	60	22.0386	44	1	150	106	1	10	4.75	131	5.51	282	16.4	15.5	70	-2.50689	50	253.5	4.87	115.063	1.4	2.91	1.13	0
1986	1	154	63	26.5643	72	1	132	76	0	7.2	4.23	130	4.33	221	18	22.4	82	-2.5148	52	221.3	6.94	95.7642	2.5	2.28	1.16	0
1987	2	170	65	22.4913	83	1	152	60	1	5.5	4.01	125	5.54	220	18	21	97	-2.83481	62	321	9.9	91.3718	0.65	1.72	0.91	1
1988	2	170	80	27.6817	58	1	132	83	0	7.4	5.06	155	6.79	206	29	19	104	-3.16313	73	342	4.2	101.605	2.03	1.39	0.93	0
1989	2	174	79	26.0933	54	1	148	82	1	6.3	4.3	134	6.63	216	31.7	24.9	77	-3.02646	87	436	5.84	91.1684	3.4	2.97	1.04	0
1990	1	163	67	25.2174	33	1	149	115	1	11.3	4.88	146	8.7	341	17.7	19.4	117	-2.95005	43	330.6	3.04	127.771	1.84	3.27	0.92	0
1991	2	169	69	24.1588	71	1	162	86	1	10.3	4.36	133	6.89	191	11.5	13.1	73	-2.3753	64	281.5	6.39	97.5125	1.37	2.71	0.93	0
1992	2	175	75	24.4898	51	1	118	82	0	6.5	4.51	141	7	218	22.6	22.6	72	-2.81976	84	419.7	5.35	96.8803	2.23	2.48	1.25	0
1993	2	170	75	25.9516	54	1	142	93	1	7.1	5.26	160	5.43	164	13	15.1	79	-2.53139	82	469.8	4.9	97.8793	2.21	2.37	0.93	1
1994	2	165	80	29.3848	65	1	126	68	0	8.6	4.86	101	7.64	276	14	15	84	-3.52514	57	286	6.2	104.823	2.04	2.69	0.9	0
1995	2	165	62.5	22.9568	55	1	138	72	0	11.8	4.68	151	5.66	202	15.6	15.4	112	-2.69372	66	153.4	7.07	106.719	1.49	2.74	1.03	0
1996	1	155	63	26.2227	53	1	143	98	1	7.5	4.46	134	8.3	201	16	48	127	-3.414	62	200	5.1	103.111	0.95	2.55	1.03	0
1997	1	150	45	20	53	1	120	87	0	13	4.01	122	9.9	220	12	14	119	-2.53346	30	210	4.8	123.053	0.94	3.2	0.93	1
1998	1	168	67	23.7387	57	1	112	77	0	8.5	4.27	127	3.75	90	282	179	126	-2.63191	50	233	3.8	106.126	1.31	2.74	1.17	0
1999	2	165	60	22.0386	72	1	135	84	0	11.7	3.91	119	11.81	273	11	12	96	-2.41888	124	455	11.59	53.2775	1.45	2.39	0.55	0
[truncated: 7,512 more rows]

## Sheet: Codebook
Sex	1	Female
	2	Male
Marital status	0	Never married
	1	Married
	2	Others
hypertension	0	No
	1	Yes
Renal stones	0	No
	1	Yes
